# Supplementary material for: Al(OCArF3)3 – a thermally stable Lewis superacid
Source: PubMed Central journal article supplement — Chem Sci. 2018 Oct 2;9(43):8178–83. doi: 10.1039/c8sc02981d (PMC6256356; doi:10.1039/c8sc02981d), 2018-10-02
Supplement: SC-009-C8SC02981D-s001.pdf [file SC-009-C8SC02981D-s001.pdf]

# Supporting Information

## **Al(OAr<sup>F</sup><sub>3</sub>)<sub>3</sub> – A Thermally Stable Lewis Superacid**

Julius F. Kögel, Alexey Y. Timoshkin, Artem Schröder, Enno Lork, Jens Beckmann

### Table of Contents

|                                                                                                            |     |
|------------------------------------------------------------------------------------------------------------|-----|
| General Information                                                                                        | S2  |
| Synthetic Procedures                                                                                       | S2  |
| Competition Experiments between Al(OAr <sup>F</sup> <sub>3</sub> ) <sub>3</sub> and SbF <sub>6</sub> Salts | S9  |
| Thermogravimetric Analysis                                                                                 | S9  |
| Crystallographic Data                                                                                      | S9  |
| <sup>19</sup> F NMR Spectra                                                                                | S20 |
| Computational Details                                                                                      | S27 |
| Computation of FIA                                                                                         | S29 |
| Electrostatic Potentials                                                                                   | S32 |
| Global Electrophilicity Index                                                                              | S33 |

## General Information

Reactions were carried out under inert atmosphere using standard Schlenk techniques. Moisture and air sensitive substances were stored in a conventional argon-flushed glovebox (BRAUN). Dry solvents were collected from a MB-SPS-800 (BRAUN) solvent system and kept on molecular sieves under an inert atmosphere. NMR spectra were recorded at the following spectrometers: BRUKER Avance DPX-200 and BRUKER Avance WB-360. ESI mass spectra were measured on a BRUKER Esquire LC. Elemental analyses were performed using a CHN(S) Vario Micro Cube (ELEMENTAR). IR spectra were recorded on an ATR-FT-IR spectrometer (BRUKER) in a nitrogen flushed glovebox. Thermogravimetric analyses (TGA) and differential scanning calorimetry (DSC) measurements were conducted using a Mettler Toledo TGA/DSC 3+ Star<sup>c</sup> System. The sample was heated with a temperature gradient of 10 K·min<sup>-1</sup>. The perfluorinated alcohol (C<sub>6</sub>F<sub>5</sub>)<sub>3</sub>COH was prepared according to a literature procedure.<sup>[1]</sup>

## Synthetic Procedures

### Synthesis of Al(OCaR<sup>F</sup><sub>3</sub>)<sub>3</sub> (1)

A solution of (C<sub>6</sub>F<sub>5</sub>)<sub>3</sub>COH (4.77 g, 9.00 mmol, 3.0 eq.) in toluene (100 mL) was added dropwise to a solution of triethylaluminum (0.34 g, 3.00 mmol, 1.0 eq.) in toluene (50 mL) at -78 °C. The colorless solution was allowed to reach room temperature after 1 h. After stirring the reaction mixture at room temperature for 1 h, it was heated to 90 °C until the gas evolution had ceased after 1 h. A white precipitate formed after 30 min and the suspension was left overnight at -30 °C. The solution was decanted from the white solid and the residue was washed with *n*-hexane (40 mL) twice. Drying *in vacuo* gave 3.21 g Al(OCaR<sup>F</sup><sub>3</sub>)<sub>3</sub> (1.99 mmol, 66%) as a white powder. Colorless crystals suitable for XRD analysis were obtained from an analogous procedure in which the precipitation from the reaction mixture began after removing it from the refrigerator.

<sup>13</sup>C NMR (50 MHz, THF-d<sub>8</sub>, 20 °C, TMS) (THF-d<sub>8</sub> adduct): δ=145.7 (d, <sup>1</sup>J(C,F) = 248.1 Hz, CF), 141.9 (dt, <sup>1</sup>J(C,F) = 255.0 Hz, <sup>2</sup>J(C,F) = 13.5 Hz, *p*-CF), 138.5 (dt, <sup>1</sup>J(C,F) = 253.7 Hz, <sup>2</sup>J(C,F) = 15.1 Hz, CF), 119.6 (s, *ipso*-C), 76.0 ppm (s, CO);<sup>[2]</sup> <sup>19</sup>F NMR (188 MHz, THF-d<sub>8</sub>, 20 °C, CFCl<sub>3</sub>) (THF-d<sub>8</sub> adduct): δ=-142.0 (d, <sup>3</sup>J(F,F) = 19.4 Hz, 12F, *o*-F), -142.6 (d, <sup>3</sup>J(F,F) = 20.0 Hz, 6F, *o*-F), -156.7 (t, <sup>3</sup>J(F,F) = 20.9 Hz, 6F, *p*-F), -157.7 (t, <sup>3</sup>J(F,F) = 20.7 Hz, 3F, *p*-F), -165.3 (t, <sup>3</sup>J(F,F) = 19.5 Hz, 12F, *m*-F), -165.7 ppm (t, <sup>3</sup>J(F,F) = 19.9 Hz, 6F, *m*-F);<sup>[2]</sup> elemental analysis calcd (%) for C<sub>57</sub>AlF<sub>45</sub>O<sub>3</sub>: C 42.40, H 0.00, N 0.00; found: C 42.88, H 0.27, N 0.00; IR:  $\tilde{\nu}$ =1652 (w), 1527 (m), 1486 (s), 1407 (w), 1307 (w), 1194 (w), 1134 (s), 1026 (m), 1015 (m), 985 (s), 960 (m), 896 (w), 795 (s), 754 (w), 725 (w), 704 (m), 695 (m), 637 (w), 622 (w), 580 (w), 488 (w), 463 cm<sup>-1</sup> (w).

### Synthesis of Al(OCaR<sup>F</sup><sub>3</sub>)<sub>3</sub>·MeCN·PhMe (2)

A solution of triethylaluminum in *n*-hexane (1M, 1.5 mL, 1.50 mmol, 1 eq.) was added in one portion to a solution of (C<sub>6</sub>F<sub>5</sub>)<sub>3</sub>COH (2.39 g, 4.50 mmol, 3.0 eq.) in toluene (75 mL) at -78 °C. The reaction mixture was allowed to reach room temperature after 1 h and stirred for another 1 h. It was stirred at 90 °C for 1 h. Acetonitrile was added (0.2 mL) to the hot reaction mixture leading to immediate crystallization of the product. The obtained crystals were suitable for XRD analysis. The reaction mixture was left for further crystallization over three days and the supernatant was removed by decantation. The colorless crystals were washed with toluene (25 mL) and *n*-hexane (25 mL) twice and dried *in vacuo* to yield 1.87 g Al(OCaR<sup>F</sup><sub>3</sub>)<sub>3</sub>·MeCN·PhMe (1.07 mmol, 71%) as a white solid.

<sup>1</sup>H NMR (200 MHz, CD<sub>2</sub>Cl<sub>2</sub>, 20 °C, TMS): δ=7.27-7.15 (m, 5H, C<sub>6</sub>H<sub>5</sub>), 2.57 (s, 3H, CH<sub>3</sub>CN), 2.33 ppm (s, 3H, PhCH<sub>3</sub>); <sup>19</sup>F NMR (188 MHz, CD<sub>2</sub>Cl<sub>2</sub>, 20 °C, CFCl<sub>3</sub>): δ=-142.5 (d, <sup>3</sup>J(F,F) = 20.0 Hz, 18F, *o*-F), -156.1 (t, <sup>3</sup>J(F,F) = 20.9 Hz, 9F, *p*-F), -164.7 ppm (t, <sup>3</sup>J(F,F) = 19.6 Hz, 18F, *m*-F); elemental analysis calcd (%) for C<sub>66</sub>H<sub>11</sub>AlF<sub>45</sub>NO<sub>3</sub>: C 45.36, H 0.63, N 0.80; found: C 45.30, H 0.58, N 0.83; IR:  $\tilde{\nu}$ =2344

(w), 2314 (w), 1653 (w), 1527 (m), 1489 (s), 1402 (w), 1369 (w), 1302 (m), 1200 (m), 1129 (m), 1117 (m), 1025 (m), 1008 (m), 995 (m), 980 (m), 959 (m), 890 (w), 828 (w), 796 (m), 788 (m), 767 (w), 747 (w), 731 (w), 713 (w), 698 (m), 689 (m), 646 (w), 631 (w), 618 (w), 579 (w), 487 (w), 466 (w), 453 (w), 422  $\text{cm}^{-1}$  (w).

The adduct with deuterated acetonitrile  $\text{Al}(\text{OCaR}^{\text{F}_3})_3 \cdot \text{CD}_3\text{CN} \cdot \text{PhMe}$  was prepared in an analogous procedure and revealed the following signals in the IR spectrum: IR:  $\tilde{\nu}$ =2338 (w), 1653 (w), 1527 (m), 1490 (s), 1402 (w), 1302 (w), 1200 (m), 1129 (m), 1117 (m), 1025 (m), 1008 (s), 995 (s), 980 (m), 960 (m), 889 (w), 872 (w), 796 (m), 788 (m), 767 (w), 747 (w), 731 (w), 713 (w), 698 (m), 689 (m), 646 (w), 632 (w), 618 (w), 579 (w), 487 (w), 466 (w), 453 (w), 421  $\text{cm}^{-1}$  (w).

### Synthesis of $\text{Al}(\text{OCaR}^{\text{F}_3})_3 \cdot \text{THF}$ (3)

A solution of triethylaluminum in *n*-hexane (1M, 1.5 mL, 1.50 mmol, 1 eq.) was added in one portion to a solution of  $(\text{C}_6\text{F}_5)_3\text{COH}$  (2.39 g, 4.50 mmol, 3.0 eq.) in toluene (75 mL) at  $-78^\circ\text{C}$ . The reaction mixture was allowed to reach room temperature after 1 h and stirred for another 1 h. It was stirred at  $90^\circ\text{C}$  for 1 h. THF was added (0.2 mL) to the hot reaction mixture leading to crystallization of the product after 1 h. The obtained crystals were suitable for XRD analysis. The reaction mixture was left for further crystallization over three days and the supernatant was decanted from the colorless crystals. They were washed with *n*-hexane (25 mL) twice and dried *in vacuo* to yield 1.78 g  $\text{Al}(\text{OCaR}^{\text{F}_3})_3 \cdot \text{THF}$  (1.06 mmol, 70%) as a white solid.

$^1\text{H}$  NMR (200 MHz,  $\text{CD}_2\text{Cl}_2$ ,  $20^\circ\text{C}$ , TMS):  $\delta$ =3.91-3.84 (m, 4H,  $\text{OCH}_2$ ), 1.99-1.92 ppm (m, 4H,  $\text{OCH}_2\text{CH}_2$ );  $^{19}\text{F}$  NMR (188 MHz,  $\text{CD}_2\text{Cl}_2$ ,  $20^\circ\text{C}$ ,  $\text{CFCl}_3$ ):  $\delta$ =-141.7 (d,  $^3J(\text{F},\text{F}) = 19.5$  Hz, 18F, *o*-F), -155.4 (t,  $^3J(\text{F},\text{F}) = 20.9$  Hz, 9F, *p*-F), -164.3 ppm (t,  $^3J(\text{F},\text{F}) = 20.0$  Hz, 18F, *m*-F); elemental analysis calcd (%) for  $\text{C}_{61}\text{H}_8\text{AlF}_{45}\text{O}_4$ : C 43.44, H 0.48, N 0.00; found: C 43.15, H 0.51, N 0.00; IR:  $\tilde{\nu}$ =1651 (w), 1527 (m), 1486 (s), 1406 (w), 1306 (w), 1176 (m), 1130 (m), 1025 (m), 1009 (m), 998 (m), 980 (m), 855 (w), 860 (w), 796 (m), 787 (m), 769 (w), 749 (w), 735 (w), 711 (w), 699 (m), 674 (w), 648 (w), 631 (w), 581 (w), 488 (w), 444 (w), 411  $\text{cm}^{-1}$  (w).

### Synthesis of $\text{Al}(\text{OCaR}^{\text{F}_3})_3 \cdot \text{Et}_2\text{O}$ (4)

A solution of  $(\text{C}_6\text{F}_5)_3\text{COH}$  (2.39 g, 4.50 mmol, 3 eq.) in toluene (100 ml) was added dropwise to a solution of triethylaluminum in toluene (50 mL) at  $-78^\circ\text{C}$ . The yellow reaction mixture was stirred at  $-78^\circ\text{C}$  for 1 h and allowed to reach room temperature. It was stirred at that temperature for 1 h and another 1 h at  $90^\circ\text{C}$  until the gas evolution had ceased. After cooling the solution to room temperature, diethyl ether (0.3 mL) was added and the reaction mixture was kept at  $-78^\circ\text{C}$  overnight. Colorless crystals suitable for XRD analysis formed after removing the flask from the fridge. They were separated from the supernatant by decantation, washed with toluene (15 mL) and twice with hexane (20 mL). After drying *in vacuo* at  $50^\circ\text{C}$ , 762 mg  $\text{Al}(\text{OCaR}^{\text{F}_3})_3 \cdot \text{Et}_2\text{O}$  (0.45 mmol, 30%) were obtained as a white solid.

$\text{Al}(\text{OCaR}^{\text{F}_3})_3 \cdot \text{Et}_2\text{O}$  reveals more complicated  $^1\text{H}$  and  $^{19}\text{F}$  NMR spectra compared to the other Lewis acid base adducts of  $\text{Al}(\text{OCaR}^{\text{F}_3})_3$  (for  $^{19}\text{F}$  NMR spectrum see Figure S14);  $^1\text{H}$  NMR (200 MHz,  $\text{C}_6\text{D}_6$ ,  $20^\circ\text{C}$ , TMS):  $\delta$ =3.65 (quart,  $^3J(\text{H},\text{H}) = 6.9$  Hz,  $\text{OCH}_2$ ), 3.51 (quart,  $^3J(\text{H},\text{H}) = 7.0$  Hz,  $\text{OCH}_2$ ), 3.25 (quart,  $^3J(\text{H},\text{H}) = 7.0$  Hz,  $\text{OCH}_2$ ), 1.10 (t,  $^3J(\text{H},\text{H}) = 7.0$  Hz,  $\text{CH}_3$ ), 0.54 (t,  $^3J(\text{H},\text{H}) = 7.0$  Hz,  $\text{CH}_3$ ), 0.45 ppm (t,  $^3J(\text{H},\text{H}) = 7.0$  Hz,  $\text{CH}_3$ ) (the quartets are in a 0.89 : 0.70 : 1.00 ratio, the ratio of the triplets is 1.00 : 0.64 : 0.81 (different ratios due to signal overlap)); elemental analysis calcd (%) for  $\text{C}_{61}\text{H}_{10}\text{AlF}_{45}\text{O}_4$ : C 43.39, H 0.60, N 0.00; found: C 43.56, H 0.86, N 0.20; IR:  $\tilde{\nu}$ =1652 (w), 1528 (m), 1481 (s), 1403 (w), 1302 (w), 1130 (w), 1023 (m), 1009 (s), 993 (s), 981 (s), 981 (s), 881 (w), 796 (m), 789 (m), 767 (w), 749 (w), 700 (m), 676 (w), 644 (w), 630 (w), 580 (w), 555 (w), 488 (w), 455 (w), 445 (w), 417  $\text{cm}^{-1}$  (w).

### Synthesis of Al(OCAr<sup>F</sup><sub>3</sub>)<sub>3</sub>·Pyridine (5)

A solution of (C<sub>6</sub>F<sub>5</sub>)<sub>3</sub>COH (2.39 g, 4.50 mmol, 3 eq.) in toluene (100 ml) was added dropwise to a solution of triethylaluminum in toluene (50 mL) at -78 °C. The yellow reaction mixture was stirred at -78 °C for 1 h and allowed to reach room temperature. It was stirred at that temperature for 1 h and another 1 h at 90 °C until the gas evolution had ceased. Pyridine (0.3 mL) was added leading to the precipitation of a white solid. The reaction mixture was filtered through a syringe filter and left for crystallization at 4 °C overnight. It was separated from the supernatant by decantation and washed with toluene (20 mL) and twice with hexane (50 mL). Drying *in vacuo* yielded 797 mg Al(OCAr<sup>F</sup><sub>3</sub>)<sub>3</sub>·pyridine (0.47 mmol, 31%) as a white solid.

<sup>1</sup>H NMR (200 MHz, CD<sub>2</sub>Cl<sub>2</sub>, 20 °C, TMS): δ=8.28 (d, <sup>3</sup>J(H,H) = 5.3 Hz, 2H, *o*-H), 8.13 (d, <sup>3</sup>J(H,H) = 7.7 Hz, 1H, *p*-H), 7.47 ppm (d, <sup>3</sup>J(H,H) = 7.1 Hz, 2H, *m*-H); <sup>19</sup>F NMR (188 MHz, CD<sub>2</sub>Cl<sub>2</sub>, 20 °C, CFCl<sub>3</sub>): δ=-141.6 (d, <sup>3</sup>J(F,F) = 20.0 Hz, 18F, *o*-F), -155.8 (t, <sup>3</sup>J(F,F) = 21.2 Hz, 9F, *p*-F), -164.4 ppm (t, <sup>3</sup>J(F,F) = 19.6 Hz, 18F, *m*-F); elemental analysis calcd (%) for C<sub>62</sub>H<sub>5</sub>AlF<sub>45</sub>NO<sub>3</sub>: C 43.97, H 0.30, N 0.83; found: C 44.29, H 0.44, N 1.11; IR:  $\tilde{\nu}$ =1652 (w), 1621 (w), 1528 (m), 1491 (s), 1480 (s), 1455 (w), 1402 (w), 1303 (w), 1213 (w), 1176 (w), 1130 (m), 1076 (w), 1058 (w), 1026 (m), 1011 (s), 992 (s), 982 (m), 883 (w), 796 (m), 788 (m), 766 (w), 749 (w), 699 (m), 658 (w), 646 (w), 631 (w), 619 (w), 580 (w), 488 (w), 459 (w), 412 cm<sup>-1</sup> (w).

### Synthesis of Al(OCAr<sup>F</sup><sub>3</sub>)<sub>3</sub>·OPET<sub>3</sub> (6)

A solution of triethylphosphine oxide (42 mg, 0.310 mmol, 1.0 eq.) in dichloromethane (7.5 mL) was added dropwise to a suspension of Al(OCAr<sup>F</sup><sub>3</sub>)<sub>3</sub> (500 mg, 0.310 mmol, 1.0 eq.) in dichloromethane (7.5 mL). A clear solution formed. After stirring at room temperature overnight, the formation of a white precipitate was observed which was separated from the supernatant by decantation by a syringe. It was washed with hexane twice (15 mL) and dried *in vacuo* to yield 353 mg Al(OCAr<sup>F</sup><sub>3</sub>)<sub>3</sub>·OPET<sub>3</sub> (0.202 mmol, 65%) as a white solid. Colorless crystals suitable for XRD analysis formed from the supernatant at 4 °C.

<sup>1</sup>H NMR (200 MHz, CD<sub>2</sub>Cl<sub>2</sub>, 20 °C, TMS): δ=2.01 (dq, <sup>2</sup>J(P,H) = 14.1 Hz, <sup>3</sup>J(H,H) = 7.8 Hz, 6H, CH<sub>2</sub>), 1.14-0.98 ppm (dt, <sup>3</sup>J(P,H) = 18.7 Hz, <sup>3</sup>J(H,H) = 7.6 Hz, 9H, CH<sub>3</sub>); <sup>19</sup>F NMR (188 MHz, CD<sub>2</sub>Cl<sub>2</sub>, 20 °C, CFCl<sub>3</sub>): δ=-141.7 (d, <sup>3</sup>J(F,F) = 20.8 Hz, 18F, *o*-F), -157.0 (t, <sup>3</sup>J(F,F) = 20.9 Hz, 9F, *p*-F), -165.3 ppm (t, <sup>3</sup>J(F,F) = 19.8 Hz, 18F, *m*-F); <sup>31</sup>P NMR (81 MHz, CD<sub>2</sub>Cl<sub>2</sub>, 20 °C, 85% H<sub>3</sub>PO<sub>4</sub>): δ=73.9 ppm; elemental analysis calcd (%) for C<sub>63</sub>H<sub>15</sub>AlF<sub>45</sub>O<sub>4</sub>P: C 43.27, H 0.86, N 0.00; found: C 43.34, H 0.73, N 0.12; IR:  $\tilde{\nu}$ =1652 (w), 1526 (m), 1489 (s), 1480 (s), 1402 (w), 1302 (w), 1176 (m), 1126 (m), 1022 (s), 1007 (s), 992 (s), 979 (s), 955 (s), 878 (m), 795 (w), 787 (m), 767 (m), 748 (w), 697 (m), 685 (w), 674 (w), 646 (w), 626 (m), 603 (w), 581 (w), 514 (w), 485 (w), 454 (w), 441 cm<sup>-1</sup> (w).

### Synthesis of [Cs(THF)][FAl(OCAr<sup>F</sup><sub>3</sub>)<sub>3</sub>] (7)

Acetonitrile (50 mL) was added to a mixture of Al(OCAr<sup>F</sup><sub>3</sub>)<sub>3</sub> (1000 mg, 0.619 mmol, 1.0 eq.) and CsF (188 mg, 1.239 mmol, 2.0 eq.) and the suspension was stirred at room temperature for 1 h. The white solid dissolved after 30 min and the reaction mixture changed color to yellow and finally to pink. It was filtered through a syringe filter and the pink filtrate was evaporated to dryness *in vacuo*. The red residue was washed with diethyl ether (15 mL) three times. The remaining white solid was recrystallized from THF / *n*-hexane (10 mL / 20 mL) at -30 °C overnight. The colorless prisms were separated by decantation and washed with *n*-hexane (20 mL) twice. After drying *in vacuo*, 665 mg [Cs(THF)][FAl(OCAr<sup>F</sup><sub>3</sub>)<sub>3</sub>] (0.362 mmol, 58%) were obtained as a white solid. Single crystals suitable for XRD measurements were obtained by layering a solution of [Cs(THF)][FAl(OCAr<sup>F</sup><sub>3</sub>)<sub>3</sub>] in THF with *n*-hexane (1:2) at 4 °C.

<sup>1</sup>H NMR (200 MHz, CD<sub>3</sub>CN, 20 °C, TMS): δ=3.67-3.60 (m, 4H, OCH<sub>2</sub>), 1.83-1.76 ppm (m, 4H, OCH<sub>2</sub>CH<sub>2</sub>); <sup>13</sup>C NMR (50 MHz, CD<sub>3</sub>CN, 20 °C, TMS): δ=146.0 (d, <sup>1</sup>J(C,F) = 250.1 Hz, CF), 141.3 (dt,

$^1J(\text{C},\text{F}) = 248.4$  Hz,  $^2J(\text{C},\text{F}) = 13.7$  Hz, *p*-CF), 138.4 (dt,  $^1J(\text{C},\text{F}) = 248.0$  Hz,  $^2J(\text{C},\text{F}) = 14.4$  Hz, CF), 120.9 (s, *ipso*-C C<sub>6</sub>F<sub>5</sub>), 76.8 (s, CO), 68.3 (s, OCH<sub>2</sub>), 26.3 ppm (s, OCH<sub>2</sub>CH<sub>2</sub>);  $^{19}\text{F}$  NMR (188 MHz, CD<sub>3</sub>CN, 20 °C, CFCl<sub>3</sub>):  $\delta = -135.5$  (d,  $^3J(\text{F},\text{F}) = 17.1$  Hz, 18F, *o*-F), -154.9 (t,  $^3J(\text{F},\text{F}) = 20.4$  Hz, 9F, *p*-F), -162.4 (t,  $^3J(\text{F},\text{F}) = 17.9$  Hz, 18F, *m*-F), -171.1 ppm (s, 1F, Al-F); (-)-ESI-MS (MeCN): *m/z* (%): 1633 (100) [*M*]<sup>-</sup>; elemental analysis calcd (%) for C<sub>57</sub>AlC<sub>5</sub>F<sub>46</sub>O<sub>3</sub>: C 39.85, H 0.44, N 0.00; found: C 39.41, H 0.56, N 0.24; IR:  $\tilde{\nu} = 1651$  (w), 1524 (m), 1491 (s), 1479 (s), 1402 (w), 1298 (w), 1245 (w), 1200 (w), 1125 (m), 1112 (m), 1022 (s), 1006 (s), 980 (s), 956 (m), 874 (w), 815 (w), 795 (m), 787 (m), 768 (w), 749 (w), 723 (m), 695 (m), 683 (w), 668 (w), 644 (w), 625 (m), 580 (w), 489 (w), 453 (w), 437 cm<sup>-1</sup> (w).

### Synthesis of [Ag(Et<sub>2</sub>O)(MeCN)][FAl(OCAr<sup>F</sup><sub>3</sub>)<sub>3</sub>] (8)

Acetonitrile (40 mL) was added to a mixture of Al(OCAr<sup>F</sup><sub>3</sub>)<sub>3</sub> (1000 mg, 0.619 mmol, 1.0 eq.) and AgF (157 mg, 1.239 mmol, 2.0 eq.). The suspension was stirred in the dark at room temperature for 3 h. The reaction mixture had changed color to brown and was filtered through a syringe filter. The slightly brown filtrate was evaporated to dryness *in vacuo* and the red residue was suspended in diethyl ether (25 mL). It was filtered through a syringe filter and the colorless filtrate was mixed with *n*-hexane (60 mL) and left at 4 °C overnight for precipitation. The precipitated colorless needles were separated from the supernatant by decantation and washed with *n*-hexane (20 mL) twice. It was dried *in vacuo* to give 831 mg [Ag(Et<sub>2</sub>O)(MeCN)][FAl(OCAr<sup>F</sup><sub>3</sub>)<sub>3</sub>] (0.448 mmol, 72%) as a white solid. Single crystals suitable for XRD analysis were obtained by slow evaporation of a solution of [Ag(Et<sub>2</sub>O)(MeCN)][FAl(OCAr<sup>F</sup><sub>3</sub>)<sub>3</sub>] in a mixture of diethyl ether and *n*-hexane.

$^1\text{H}$  NMR (200 MHz, CD<sub>3</sub>CN, 20 °C, TMS):  $\delta = 3.42$  (q,  $^3J(\text{H},\text{H}) = 7.0$  Hz, 4H, CH<sub>2</sub>), 1.96 (s, 3H, CH<sub>3</sub>CN), 1.12 ppm (t, 6H,  $^3J(\text{H},\text{H}) = 7.0$  Hz, CH<sub>2</sub>CH<sub>3</sub>);  $^{13}\text{C}$  NMR (50 MHz, CD<sub>3</sub>CN, 20 °C, TMS):  $\delta = 146.0$  (d,  $^1J(\text{C},\text{F}) = 252.0$  Hz, CF), 142.2 (dd,  $^1J(\text{C},\text{F}) = 248.6$  Hz,  $^2J(\text{C},\text{F}) = 13.2$  Hz, *p*-CF), 138.3 (d,  $^1J(\text{C},\text{F}) = 249.4$  Hz, CF), 120.8 (s, *ipso*-C C<sub>6</sub>F<sub>5</sub>), 76.8 (s, CO), 66.3 (s, OCH<sub>2</sub>CH<sub>3</sub>), 15.6 ppm (s, OCH<sub>2</sub>CH<sub>3</sub>) (the signals of MeCN were not observed due to overlay with the signals of CD<sub>3</sub>CN);  $^{19}\text{F}$  NMR (188 MHz, CD<sub>3</sub>CN, 20 °C, CFCl<sub>3</sub>):  $\delta = -135.4$  (d,  $^3J(\text{F},\text{F}) = 16.4$  Hz, 18F, *o*-F), -154.9 (t,  $^3J(\text{F},\text{F}) = 20.4$  Hz, 9F, *p*-F), -162.4 (t,  $^3J(\text{F},\text{F}) = 18.0$  Hz, 18F, *m*-F), -171.1 ppm (s, 1F, Al-F); (+)-ESI-MS (MeCN): *m/z* (%): 148 (100) [Ag(MeCN)]<sup>+</sup>, 107 (65) [Ag]<sup>+</sup>; (-)-ESI-MS (MeCN): *m/z* (%): 1633 (100) [*M*]<sup>-</sup>; IR:  $\tilde{\nu} = 1651$  (w), 1524 (m), 1490 (s), 1399 (w), 1301 (w), 1154 (m), 1131 (m), 1111 (m), 1068 (w), 1023 (s), 1009 (s), 992 (s), 980 (m), 955 (w), 870 (w), 813 (m), 795 (m), 786 (w), 768 (w), 748 (w), 737 (m), 701 (m), 684 (w), 651 (w), 627 (w), 617 (w), 581 (w), 504 (w), 488 (w), 466 (w), 441 (w), 422 cm<sup>-1</sup> (w).

### Synthesis of [Ti(MeCN)][FAl(OCAr<sup>F</sup><sub>3</sub>)<sub>3</sub>] (9)

Acetonitrile (50 mL) was added to a mixture of Al(OCAr<sup>F</sup><sub>3</sub>)<sub>3</sub> (1000 mg, 0.619 mmol, 1.0 eq.) and TIF (138 mg, 0.619 mmol, 1.0 eq.) and the white suspension was stirred for 20 h at 60 °C. It was filtered through a syringe filter and the filtrate was evaporated to dryness *in vacuo*. The remaining greasy residue was recrystallized from dichloromethane / *n*-hexane (10 mL / 20 mL) at -30 °C. The resulting colorless crystals were washed twice with *n*-hexane (20 mL) and dried *in vacuo* to give 948 mg [Ti(MeCN)][FAl(OCAr<sup>F</sup><sub>3</sub>)<sub>3</sub>] (0.504 mmol, 82%) as a white solid. Single crystals suitable for XRD analysis were obtained by layering a solution of [Ti(MeCN)][FAl(OCAr<sup>F</sup><sub>3</sub>)<sub>3</sub>] in THF with *n*-hexane resulting in the crystallization of [Ti(THF)][FAl(OCAr<sup>F</sup><sub>3</sub>)<sub>3</sub>].

$^1\text{H}$  NMR (200 MHz, CD<sub>2</sub>Cl<sub>2</sub>, 20 °C, TMS):  $\delta = 1.99$  ppm (s, 3H, CH<sub>3</sub>CN);  $^{13}\text{C}$  NMR (50 MHz, CD<sub>3</sub>CN, 20 °C, TMS):  $\delta = 146.0$  (d,  $^1J(\text{C},\text{F}) = 251.7$  Hz, CF), 141.3 (dd,  $^1J(\text{C},\text{F}) = 248.6$  Hz,  $^2J(\text{C},\text{F}) = 13.4$  Hz, *p*-CF), 138.3 (dt,  $^1J(\text{C},\text{F}) = 248.9$  Hz,  $^2J(\text{C},\text{F}) = 14.6$  Hz, CF), 120.9 (s, *ipso*-C C<sub>6</sub>F<sub>5</sub>), 76.8 ppm (s, CO) (the signals of MeCN were not observed due to overlay with the signals of CD<sub>3</sub>CN);  $^{19}\text{F}$  NMR (188 MHz, CD<sub>3</sub>CN, 20 °C, CFCl<sub>3</sub>):  $\delta = -141.2$  (d,  $^3J(\text{F},\text{F}) = 16.5$  Hz, 18F, *o*-F), -160.8 (t,  $^3J(\text{F},\text{F}) = 20.4$  Hz, 9F, *p*-

F), -168.3 (t,  $^3J(\text{F},\text{F}) = 18.1$  Hz, 18F, *m*-F), -176.9 ppm (s, 1F, Al-F); (+)-ESI-MS (MeCN): m/z (%): 205 (100)  $[\text{Ti}]^+$ ; (-)-ESI-MS (MeCN): m/z (%): 1633 (100)  $[\text{M}]^-$ ; elemental analysis calcd (%) for  $\text{C}_{59}\text{H}_3\text{AlF}_{46}\text{NO}_3\text{Ti}$ : C 37.71, H 0.16, N 0.75; found: C 37.85, H 0.08, N 0.88; IR:  $\tilde{\nu}=1651$  (w), 1524 (w), 1478 (s), 1402 (s), 1335 (w), 1298 (w), 1240 (w), 1183 (w), 1125 (w), 1022 (m), 1006 (s), 989 (s), 977 (s), 957 (w), 875 (w), 822 (w), 795 (m), 788 (m), 767 (w), 749 (w), 734 (w), 698 (m), 686 (m), 662 (w), 644 (w), 627 (m), 580 (w), 552 (w), 488 (w), 455 (w), 439  $\text{cm}^{-1}$  (w).

### Synthesis of $[\text{S}(\text{NMe}_2)_3][\text{FAl}(\text{OC}(\text{C}_6\text{F}_5)_3)_3]$ (10)

A suspension of  $[(\text{Me}_2\text{N})_3\text{S}][\text{F}_2\text{Si}(\text{CH}_3)_3]$  (34 mg, 0.124 mmol, 1.0 eq.) in THF (5 mL) was added dropwise to a solution of  $\text{Al}(\text{OCAr}^{\text{F}_3})_3$  (200 mg, 0.124 mmol, 1.0 eq.) in THF (5 mL). The reaction mixture was stirred overnight and evaporated to dryness *in vacuo*. The white residue was washed twice with diethyl ether (15 mL) and dried *in vacuo* to give 125 mg of  $[\text{S}(\text{NMe}_2)_3][\text{AlF}(\text{OC}(\text{C}_6\text{F}_5)_3)_3]$  (0.070 mmol, 56%) as a white solid.

$^1\text{H}$  NMR (360 MHz,  $\text{CD}_2\text{Cl}_2$ , 20 °C, TMS):  $\delta=2.93$  ppm (s, 18H);  $^{13}\text{C}$  NMR (91 MHz,  $\text{CD}_2\text{Cl}_2$ , 20 °C, TMS):  $\delta=146.6$  (d,  $^1J(\text{C},\text{F}) = 254.3$  Hz, CF), 140.7 (dt,  $^1J(\text{C},\text{F}) = 253.1$  Hz,  $^2J(\text{C},\text{F}) = 13.2$  Hz, *p*-CF), 137.7 (dt,  $^1J(\text{C},\text{F}) = 249.3$  Hz,  $^2J(\text{C},\text{F}) = 15.1$  Hz, CF), 120.6 (s, *ipso*-C), 76.2 (s, CO), 38.9 ppm (s,  $\text{CH}_3$ );  $^{19}\text{F}$  NMR (188 MHz,  $\text{CD}_2\text{Cl}_2$ , 20 °C,  $\text{CFCl}_3$ ):  $\delta=-140.6$  (d,  $^3J(\text{F},\text{F}) = 18.2$  Hz, 18F, *o*-F), -159.6 (t,  $^3J(\text{F},\text{F}) = 21.1$  Hz, 9F, *p*-F), -167.0 (t,  $^3J(\text{F},\text{F}) = 19.1$  Hz, 18F, *m*-F), -178.4 ppm (s, 1F, Al-F); (+)-ESI-MS (MeCN): m/z (%): 164 (100)  $[\text{M}]^+$ , 120 (30)  $[\text{M}-\text{NMe}_2]^+$ ; (-)-ESI-MS (MeCN): m/z (%): 1633 (100)  $[\text{M}]^-$ ; IR:  $\tilde{\nu}=1650$  (w), 1522 (m), 1493 (s), 1401 (w), 1295 (w), 1185 (w), 1153 (m), 1132 (m), 1115 (m), 1023 (s), 1013 (s), 992 (m), 979 (m), 959 (m), 946 (m), 908 (w), 870 (w), 813 (w), 794 (m), 783 (m), 770 (w), 748 (w), 734 (w), 699 (s), 686 (m), 650 (w), 630 (w), 617 (w), 581 (w), 507 (w), 488 (w), 469 (w), 440  $\text{cm}^{-1}$  (w).

### Synthesis of $[\text{Ph}_3\text{C}][\text{FAl}(\text{OCAr}^{\text{F}_3})_3]$ (11)

A solution of triphenylmethyl fluoride (162 mg, 0.619 mmol, 1.0 eq.) in toluene (15 mL) was added to a suspension of  $\text{Al}(\text{OCAr}^{\text{F}_3})_3$  (1000 mg, 0.619 mmol, 1.0 eq.) in toluene (5 mL). The reaction mixture changed color to red and was stirred at room temperature for 10 min and another 30 min at 90 °C. It was stirred at room temperature overnight leading to precipitation of an orange solid. All volatiles were removed *in vacuo* and the orange residue was recrystallized twice from dichloromethane / *n*-hexane (15 mL / 30 mL) at 4 °C. The orange crystals were washed with *n*-hexane (30 mL) and dried *in vacuo* to give 747 mg (0.398 mmol, 64%) of  $[\text{Ph}_3\text{C}][\text{FAl}(\text{OCAr}^{\text{F}_3})_3]$ . Single crystals suitable for XRD analysis were obtained by layering a solution of  $[\text{Ph}_3\text{C}][\text{FAl}(\text{OCAr}^{\text{F}_3})_3]$  in dichloromethane with *n*-hexane at 4 °C.

$^1\text{H}$  NMR (360 MHz,  $\text{CD}_2\text{Cl}_2$ , 20 °C, TMS):  $\delta=8.29$  (t,  $^3J(\text{H},\text{H}) = 7.5$  Hz, 3H, *p*-H), 7.91 (t,  $^3J(\text{H},\text{H}) = 7.9$  Hz, 6H, *m*-H), 7.69 ppm (d,  $^3J(\text{H},\text{H}) = 7.3$  Hz, 6H, *o*-H);  $^{13}\text{C}$  NMR (91 MHz,  $\text{CD}_2\text{Cl}_2$ , 20 °C, TMS):  $\delta=211.3$  (s,  $[\text{Ph}_3\text{C}]^+$ ), 145.6 (d,  $^1J(\text{C},\text{F}) = 249.5$  Hz, CF), 144.1 (s, *p*-C  $[\text{Ph}_3\text{C}]^+$ ), 143.1 (s, *o*-C  $[\text{Ph}_3\text{C}]^+$ ), 140.7 (dt,  $^1J(\text{C},\text{F}) = 253.1$  Hz,  $^2J(\text{C},\text{F}) = 13.4$  Hz, *p*-CF), 140.4 (s, *ipso*-C  $[\text{Ph}_3\text{C}]^+$ ), 138.4 (dt,  $^1J(\text{C},\text{F}) = 249.4$  Hz,  $^2J(\text{C},\text{F}) = 14.8$  Hz, CF), 131.1 (s, *m*-C  $[\text{Ph}_3\text{C}]^+$ ), 120.6 (s, *ipso*-C  $\text{C}_6\text{F}_5$ ), 76.2 ppm (s, CO);  $^{19}\text{F}$  NMR (188 MHz,  $\text{CD}_2\text{Cl}_2$ , 20 °C,  $\text{CFCl}_3$ ):  $\delta=-140.9$  (d,  $^3J(\text{F},\text{F}) = 17.8$  Hz, 18F, *o*-F), -159.9 (t,  $^3J(\text{F},\text{F}) = 21.1$  Hz, 9F, *p*-F), -167.2 (t,  $^3J(\text{F},\text{F}) = 19.1$  Hz, 18F, *m*-F), -178.6 ppm (s, 1F, Al-F); (+)-ESI-MS (MeCN): m/z (%): 243 (100)  $[\text{Ph}_3\text{C}]^+$ , (-)-ESI-MS (MeCN): m/z (%): 1633 (100)  $[\text{M}]^-$ ; elemental analysis calcd (%) for  $\text{C}_{76}\text{H}_{15}\text{AlF}_{46}\text{O}_3$ : C 48.64, H 0.81, N 0.00; found: C 48.49, H 1.20, N 0.24; IR:  $\tilde{\nu}=1650$  (w), 1584 (w), 1522 (m), 1483 (s), 1450 (m), 1403 (w), 1357 (m), 1296 (m), 1172 (m), 1127 (m), 1104 (m), 1022 (m), 1005 (m), 990 (s), 979 (s), 955 (m), 872 (w), 842 (w), 813 (w), 794 (m), 787 (m), 766 (m), 748 (m), 700 (s), 691 (s), 645 (w), 625 (m), 609 (w), 579 (w), 488 (w), 469 (w), 440  $\text{cm}^{-1}$  (m).

### Synthesis of $[\text{Ph}_3\text{C}][\text{ClAl}(\text{OCAr}^{\text{F}_3})_3]$ (12)

Triphenylmethyl chloride (173 mg, 0.619 mmol, 1.0 eq.) was added to a suspension of  $\text{Al}(\text{OC}(\text{C}_6\text{F}_5)_3)_3$  (1000 mg, 0.619 mmol, 1.0 eq.) in toluene (25 mL). The reaction mixture changed color to red and was stirred at room temperature for 10 min and another 30 min at 90 °C. It was stirred at room temperature overnight leading to precipitation of a yellow solid. All volatiles were removed *in vacuo* and the yellow residue was recrystallized twice from dichloromethane / hexane (15 mL / 30 mL) at 4 °C. The yellow crystals were washed with hexane (30 mL) and dried *in vacuo* to give 920 mg of  $[\text{Ph}_3\text{C}][\text{ClAl}(\text{OCAr}^{\text{F}_3})_3]$  (0.486 mmol, 79%). Single crystals suitable for XRD analysis were obtained by layering a solution of  $[\text{Ph}_3\text{C}][\text{ClAl}(\text{OCAr}^{\text{F}_3})_3]$  in dichloromethane with hexane at 4 °C.

$^1\text{H}$  NMR (200 MHz,  $\text{CD}_2\text{Cl}_2$ , 20 °C, TMS):  $\delta=8.28$  (t,  $^3J(\text{H,H}) = 7.2$  Hz, 3H, *p*-H), 7.89 (t,  $^3J(\text{H,H}) = 7.9$  Hz, 6H, *m*-H), 7.68 ppm (d,  $^3J(\text{H,H}) = 7.7$  Hz, 6H, *o*-H);  $^{13}\text{C}$  NMR (50 MHz,  $\text{CD}_2\text{Cl}_2$ , 20 °C, TMS):  $\delta=211.3$  (s,  $[\text{CPh}_3]^+$ ), 145.5 (d,  $^1J(\text{C,F}) = 251.8$  Hz, CF), 144.1 (s, *p*-C  $[\text{CPh}_3]^+$ ), 143.1 (s, *o*-C  $[\text{CPh}_3]^+$ ), 140.6 (dt,  $^1J(\text{C,F}) = 246.1$  Hz,  $^2J(\text{C,F}) = 13.7$  Hz, *p*-CF), 137.8 (dt,  $^1J(\text{C,F}) = 251.7$  Hz,  $^2J(\text{C,F}) = 15.0$  Hz, CF), 131.1 (s, *m*-C  $[\text{CPh}_3]^+$ ), 120.3 (s, *ipso*-C  $\text{C}_6\text{F}_5$ ), 75.9 ppm (s, CO), *ipso*-C  $[\text{CPh}_3]^+$  was not observed due to signal overlay;  $^{19}\text{F}$  NMR (188 MHz,  $\text{CD}_2\text{Cl}_2$ , 20 °C,  $\text{CFCl}_3$ ):  $\delta=-140.8$  (d,  $^3J(\text{F,F}) = 18.1$  Hz, 18F, *o*-F), -160.2 (t,  $^3J(\text{F,F}) = 21.0$  Hz, 9F, *p*-F), -167.5 ppm (t,  $^3J(\text{F,F}) = 17.9$  Hz, 18F, *m*-F); (+)-ESI-MS (MeCN): *m/z* (%): 243 (100)  $[\text{CPh}_3]^+$ , (-)-ESI-MS (MeCN): *m/z* (%): 1649 (100)  $[M]$ ; elemental analysis calcd (%) for  $\text{C}_{76}\text{H}_{15}\text{AlClF}_{45}\text{O}_3$ : C 48.21, H 0.80, N 0.00; found: C 47.88, H 0.85, N 0.17; IR:  $\tilde{\nu}=1650$  (w), 1586 (m), 1523 (m), 1482 (s), 1451 (m), 1402 (w), 1359 (m), 1297 (m), 1189 (w), 1164 (w), 1126 (m), 1109 (m), 1021 (m), 1007 (m), 991 (m), 978 (m), 953 (w), 875 (w), 794 (m), 786 (m), 766 (m), 747 (w), 694 (m), 682 (w), 647 (w), 635 (w), 623 (m), 609 (w), 579 (w), 489 (w), 457 (m), 438  $\text{cm}^{-1}$  (w).

### Synthesis of $[\text{Li}(\text{THF})_2][\text{FAl}(\text{OCAr}^{\text{F}_3})_3]$ (13)

A solution of LiBr (12 mg, 0.138 mmol, 1.0 eq.) in THF (0.1 mL) was added dropwise to a solution of  $[\text{Ag}(\text{Et}_2\text{O})(\text{MeCN})][\text{AlF}(\text{OC}(\text{C}_6\text{F}_5)_3)_3]$  (266 mg, 0.138 mmol, 1.0 eq.) in diethyl ether (15 mL). A beige precipitate formed immediately and the suspension was stirred for 1 h at room temperature. It was filtered through a syringe filter and the colorless filtrate was evaporated to dryness *in vacuo*. The white residue was washed twice with hexane (15 mL) and dried *in vacuo* to give 196 mg of  $[\text{Li}(\text{THF})_2][\text{FAl}(\text{OCAr}^{\text{F}_3})_3]$  (0.110 mmol, 80%) as a white powder. Single crystals suitable for XRD analysis were obtained from cooling a concentrated solution of  $[\text{Li}(\text{THF})_2][\text{FAl}(\text{OCAr}^{\text{F}_3})_3]$  in diethyl ether to -30 °C revealing  $[\text{Li}(\text{Et}_2\text{O})_2][\text{FAl}(\text{OCAr}^{\text{F}_3})_3] \cdot 0.5\text{Et}_2\text{O}$ .

$^1\text{H}$  NMR (200 MHz,  $[\text{D}_3]\text{MeCN}$ , 20 °C, TMS):  $\delta=3.67$ -3.61 (m, 8H,  $\text{OCH}_2$ ), 1.83-1.77 ppm (m, 8H,  $\text{OCH}_2\text{CH}_2$ );  $^{13}\text{C}$  NMR (50 MHz,  $[\text{D}_3]\text{MeCN}$ , 20 °C, TMS):  $\delta=145.9$  (d,  $^1J(\text{C,F}) = 251.1$  Hz, CF), 141.1 (dd,  $^1J(\text{C,F}) = 236.7$  Hz,  $^2J(\text{C,F}) = 13.5$  Hz, *p*-CF), 138.2 (dt,  $^1J(\text{C,F}) = 248.9$  Hz,  $^2J(\text{C,F}) = 14.5$  Hz, CF), 120.8 (s, *ipso*-C  $\text{C}_6\text{F}_5$ ), 76.7 (s, CO), 68.3 ( $\text{OCH}_2$ ), 26.2 ppm ( $\text{OCH}_2\text{CH}_2$ );  $^{19}\text{F}$  NMR (188 MHz,  $[\text{D}_3]\text{MeCN}$ , 20 °C,  $\text{CFCl}_3$ ):  $\delta=-141.2$  (d,  $^3J(\text{F,F}) = 16.4$  Hz, 18F, *o*-F), -160.6 (t,  $^3J(\text{F,F}) = 20.5$  Hz, 9F, *p*-F), -168.2 (t,  $^3J(\text{F,F}) = 18.2$  Hz, 18F, *m*-F), -177.3 ppm (s, 1F, Al-F); (-)-ESI-MS (MeCN): *m/z* (%): 1633 (100)  $[M]$ ; IR:  $\tilde{\nu}=2891$  (w), 1651 (w), 1621 (w), 1524 (m), 1481 (s), 1404 (w), 1335 (w), 1301 (w), 1244 (w), 1183 (w), 1128 (m), 1022 (s), 1007 (s), 992 (s), 979 (s), 956 (w), 917 (w), 879 (w), 822 (w), 795 (m), 787 (m), 768 (w), 749 (w), 733 (w), 697 (m), 669 (w), 647 (w), 628 (m), 581 (w), 553 (w), 488 (w), 454 (w), 444  $\text{cm}^{-1}$  (m).

### Synthesis of [NBu<sub>4</sub>][FAl(OCAr<sup>F</sup><sub>3</sub>)<sub>3</sub>] (14)

NBu<sub>4</sub>Br (35 mg, 0.108 mmol, 1.0 eq.) was added to a solution of [Ag(Et<sub>2</sub>O)(MeCN)][FAl(OC(C<sub>6</sub>F<sub>5</sub>)<sub>3</sub>)<sub>3</sub>] (200 mg, 0.108 mmol, 1.0 eq.) in dichloromethane (10 mL) leading to immediate precipitation of AgBr. The white suspension was stirred for 1 h at room temperature, filtered through a syringe filter and reduced to about half of its volume *in vacuo*. It was layered with hexane (12 mL) and left for crystallization at 4 °C for 2 h. The white crystals were separated from the colorless supernatant by decantation with a syringe, washed with hexane (15 mL) and dried *in vacuo* to give 79 mg of [NBu<sub>4</sub>][FAl(OCAr<sup>F</sup><sub>3</sub>)<sub>3</sub>] (0.042 mmol, 39%) as a white solid.

<sup>1</sup>H NMR (200 MHz, [D<sub>3</sub>]MeCN, 20 °C, TMS): δ=3.11-3.03 (m, 8H, NCH<sub>2</sub>), 1.68-1.52 (m, 8H, NCH<sub>2</sub>CH<sub>2</sub>), 1.35 (sext, <sup>3</sup>J(H,H) = 7.3 Hz, 8H, CH<sub>2</sub>CH<sub>3</sub>), 0.96 ppm (t, <sup>3</sup>J(H,H) = 7.2 Hz, 12H, CH<sub>3</sub>); <sup>13</sup>C NMR (50 MHz, CD<sub>3</sub>CN, 20 °C, TMS): δ=146.1 (d, <sup>1</sup>J(C,F) = 251.4 Hz, CF), 141.2 (dd, <sup>1</sup>J(C,F) = 249.7 Hz, <sup>2</sup>J(C,F) = 13.7 Hz, *p*-CF), 138.3 (dt, <sup>1</sup>J(C,F) = 247.1 Hz, <sup>2</sup>J(C,F) = 14.3 Hz, CF), 120.8 (s, *ipso*-C C<sub>6</sub>F<sub>5</sub>), 76.8 (s, CO), 59.4 (NCH<sub>2</sub>), 24.3 (NCH<sub>2</sub>CH<sub>2</sub>), 20.3 (CH<sub>2</sub>CH<sub>3</sub>), 13.7 ppm (CH<sub>3</sub>); <sup>19</sup>F NMR (188 MHz, [D<sub>3</sub>]MeCN, 20 °C, CFCl<sub>3</sub>): δ=-141.2 (d, <sup>3</sup>J(F,F) = 16.2 Hz, 18F, *o*-F), -160.6 (t, <sup>3</sup>J(F,F) = 20.4 Hz, 9F, *p*-F), -168.2 (t, <sup>3</sup>J(F,F) = 18.2 Hz, 18F, *m*-F), -176.8 ppm (s, 1F, Al-F); (+)-ESI-MS (MeCN): m/z (%): 242 (100) [C<sub>16</sub>H<sub>36</sub>N]<sup>+</sup>; (-)-ESI-MS (MeCN): m/z (%): 1633 (100) [M]<sup>-</sup>; elemental analysis calcd (%) for C<sub>73</sub>H<sub>36</sub>AlF<sub>46</sub>NO<sub>3</sub>: C 46.74, H 1.93, N 0.75; found: C 46.56, H 1.93, N 1.10; IR:  $\tilde{\nu}$ =2963 (w), 2081 (w), 1651 (w), 1523 (m), 1491 (s), 1400 (w), 1299 (w), 1209 (w), 1155 (w), 1130 (m), 1108 (m), 1023 (m), 1009 (s), 991 (s), 979 (s), 954 (s), 869 (m), 813 (w), 795 (w), 786 (m), 768 (s), 747 (w), 734 (m), 701 (m), 683 (m), 649 (w), 627 (w), 616 (w), 581 (w), 489 (w), 467 (w), 443 cm<sup>-1</sup> (w).

### Synthesis of [FeCp<sub>2</sub>][FAl(OCAr<sup>F</sup><sub>3</sub>)<sub>3</sub>] (15)

A solution of [Ag(Et<sub>2</sub>O)(MeCN)][FAl(OC(C<sub>6</sub>F<sub>5</sub>)<sub>3</sub>)<sub>3</sub>] (200 mg, 0.108 mmol, 1.0 eq.) in dichloromethane (6 mL) was added dropwise to a solution of ferrocene (29 mg, 0.156 mmol, 1.5 eq.) in dichloromethane (6 mL) at 0 °C leading to an immediate color change to dark blue. The reaction mixture was stirred for 30 min at 0 °C and another 30 min at room temperature. It was filtered through a syringe filter to remove elemental silver, reduced to about half of its volume *in vacuo* and layered with hexane (12 mL). Leaving the reaction mixture for crystallization at 4 °C for 2 h resulted in the formation a dark blue precipitate. The yellow supernatant was removed by decantation and the blue solid was washed twice with hexane (15 mL). Drying *in vacuo* yielded 138 mg [FeCp<sub>2</sub>][FAl(OCAr<sup>F</sup><sub>3</sub>)<sub>3</sub>] (0.076 mmol, 70%) as a blue solid. Dark blue needles suitable for XRD analysis were obtained by layering a concentrated solution of [FeCp<sub>2</sub>][FAl(OCAr<sup>F</sup><sub>3</sub>)<sub>3</sub>] in dichloromethane with hexane.

<sup>19</sup>F NMR (188 MHz, [D<sub>3</sub>]MeCN, 20 °C, CFCl<sub>3</sub>): δ=-141.2 (d, <sup>3</sup>J(F,F) = 16.0 Hz, 18F, *o*-F), -160.6 (t, <sup>3</sup>J(F,F) = 20.4 Hz, 9F, *p*-F), -168.2 (t, <sup>3</sup>J(F,F) = 18.1 Hz, 18F, *m*-F), -176.8 ppm (s, 1F, Al-F); (+)-ESI-MS (MeCN): m/z (%): 186 (100) [C<sub>10</sub>H<sub>10</sub>Fe]<sup>+</sup>; (+)-ESI-HRMS (MeCN): m/z calcd for C<sub>10</sub>H<sub>10</sub>Fe<sup>+</sup>: 186.0126 [M]<sup>+</sup>; found: 186.0126; (-)-ESI-MS (MeCN): m/z (%): 1633 (100) [M]<sup>-</sup>; (-)-ESI-HRMS (MeCN): m/z calcd for C<sub>57</sub>AlF<sub>46</sub>O<sub>3</sub><sup>-</sup>: 1632.8934 [M]<sup>-</sup>; found: 1632.8947; elemental analysis calcd (%) for C<sub>67</sub>H<sub>10</sub>AlF<sub>46</sub>FeO<sub>3</sub>: C 44.23, H 0.55, N 0.00; found: C 43.85, H 0.64, N 0.51; IR:  $\tilde{\nu}$ =3114 (w), 1651 (w), 1522 (m), 1494 (s), 1401 (w), 1295 (w), 1152 (m), 1133 (m), 1116 (m), 1024 (s), 1014 (s), 980 (m), 960 (w), 870 (w), 854 (w), 813 (w), 795 (m), 783 (m), 770 (w), 748 (w), 734 (w), 700 (m), 651 (w), 630 (w), 617 (w), 581 (w), 507 (w), 440 cm<sup>-1</sup> (w).



## Competition Experiments between $\text{Al}(\text{OCAr}^{\text{F}_3})_3$ and $\text{SbF}_6$ Salts

Toluene (0.5 mL) is added to a mixture of  $\text{Al}(\text{OCAr}^{\text{F}_3})_3$  (10.1 mg, 6.3  $\mu\text{mol}$ , 1 eq.) and  $\text{NBu}_4\text{SbF}_6$  (3.0 mg, 6.3  $\mu\text{mol}$ , 1 eq.) and the suspension is treated with ultrasonic for 1 h. The previously white solid turned grey and the  $^{19}\text{F}$  NMR spectrum of the supernatant reveals the formation of  $[\text{FAl}(\text{OCAr}^{\text{F}_3})_3]^-$  and the free alcohol  $\text{Ar}^{\text{F}_3}\text{COH}$ . The formation of  $\text{Ar}^{\text{F}_3}\text{COH}$  can be referred to the decomposition of  $\text{Al}(\text{OCAr}^{\text{F}_3})_3$  by HF which is formed from the reaction of  $\text{SbF}_5$  with toluene.<sup>[3]</sup> A similar  $^{19}\text{F}$  NMR spectrum was observed when the experiment is repeated in dichloromethane resulting in the formation of a beige reaction mixture. Suspending equimolar mixtures of  $\text{Al}(\text{OCAr}^{\text{F}_3})_3$  and  $\text{AgSb}_6$  in 1,2-difluorobenzene or dichloromethane led to a color change to dark blue (in  $\text{C}_6\text{H}_4\text{F}_2$ ) or beige (in  $\text{CH}_2\text{Cl}_2$ ).  $[\text{FAl}(\text{OCAr}^{\text{F}_3})_3]^-$  could not be detected in the  $^{19}\text{F}$  NMR spectra which revealed very unselective reactions due to the formation of  $\text{SbF}_5$ .

## Thermogravimetric Analysis and Differential Scanning Calorimetry

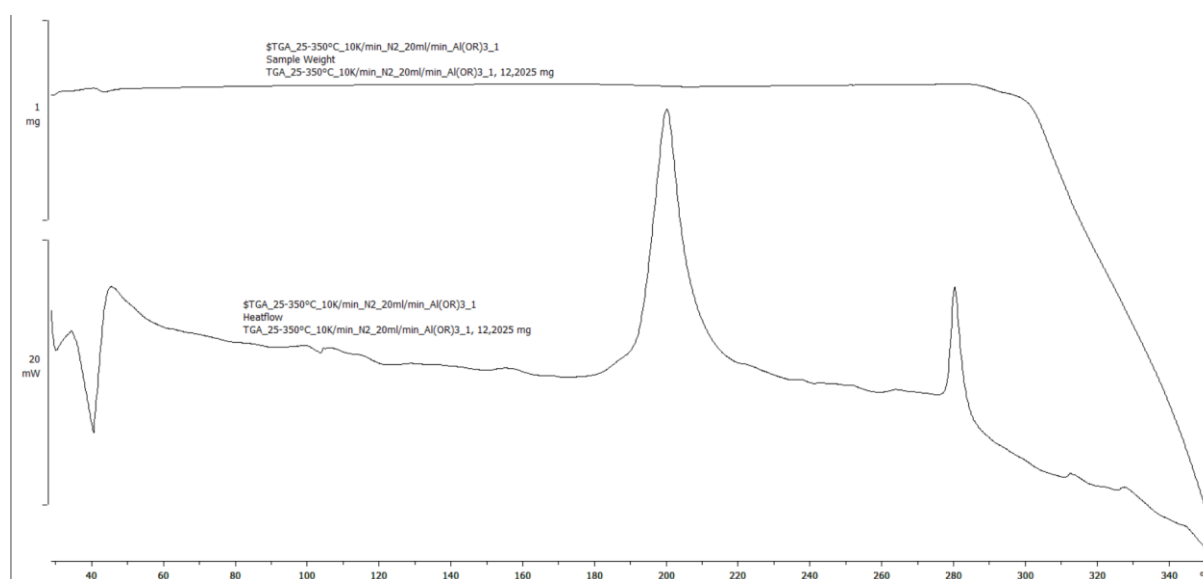

**Figure S1.** Thermogravimetric analysis (top curve) and differential scanning calorimetry (bottom curve) of  $\text{Al}(\text{OCAr}^{\text{F}_3})_3$ .

## Crystallographic Data

Intensity data were collected using a Bruker Venture D8 diffractometer at 100 K with graphite-monochromated  $\text{Mo-K}\alpha$  (0.7107 Å) radiation. All the structures were solved by direct methods and refined based on  $F^2$  by use of the SHELX program package implemented in WinGX.<sup>[4]</sup> Mercury (version 3.8)<sup>[5]</sup> and Platon<sup>[6]</sup> were used for evaluation during refinement. All non-hydrogen atoms were refined by using anisotropic displacement parameters. Hydrogen atoms were refined at idealized positions and fixed thermal parameters. Molecular structures were illustrated with Diamond 3<sup>[7]</sup> using thermal ellipsoids at the 50% probability level and balls with an arbitrarily fixed radius. Hydrogen atoms are omitted for clarity. Crystal structures were deposited at the Cambridge Crystallographic Data Centre (CCDC, <https://www.ccdc.cam.ac.uk/>) with the numbers 1818681-1818687, 1863847-1863852 and 1866467.

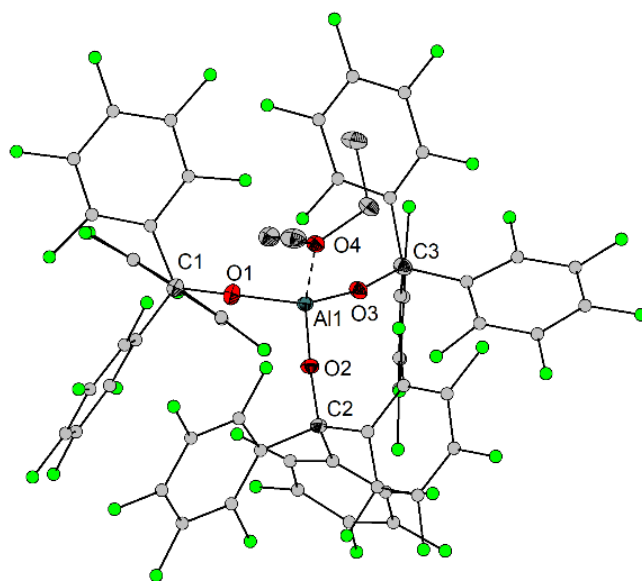

**Figure S2.** Molecular structure of  $\text{Al}(\text{OCArF}_3)_3 \cdot \text{Et}_2\text{O}$  (ellipsoids with 50% probability, balls with a arbitrarily fixed radius; hydrogen atoms are omitted for clarity, the unit cell contains residual electron density representing a severely disordered molecule of diethyl ether and toluene which has been treated as a diffuse contribution to the overall scattering without specific atom positions by Squeeze/OLEX). Selected bond lengths /Å: Al1-O1 1.696(1), Al1-O2 1.707(1), Al1-O3 1.705(1), Al1-O4 1.877(1).

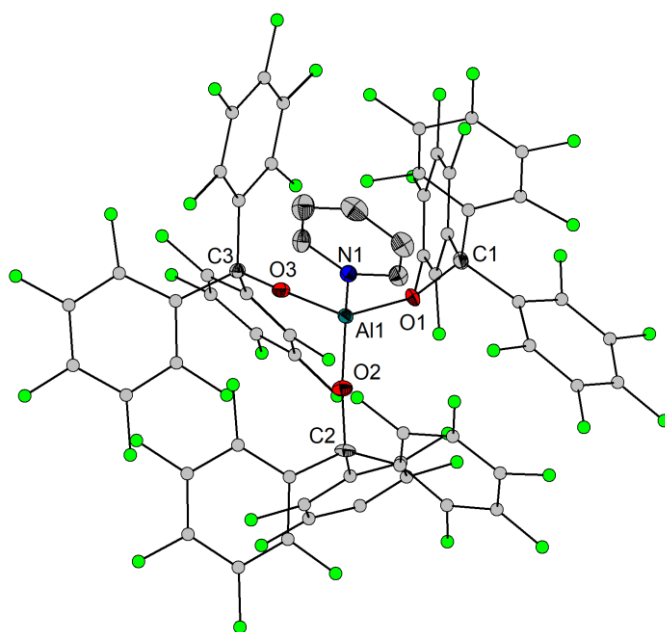

**Figure S3.** Molecular structure of  $\text{Al}(\text{OCArF}_3)_3 \cdot \text{pyridine}$  (ellipsoids with 50% probability, balls with a arbitrarily fixed radius; hydrogen atoms are omitted for clarity, only one out of five molecules in the asymmetric unit is displayed). Selected bond lengths /Å: Al1-O1 1.711(3), Al1-O2 1.699(3), Al1-O3 1.704(3), Al1-N1 1.974(3), Al2-N2 1.971(3), Al3-N3 1.956(3), Al4-N4 1.964(3), Al5-N5 1.965(3).

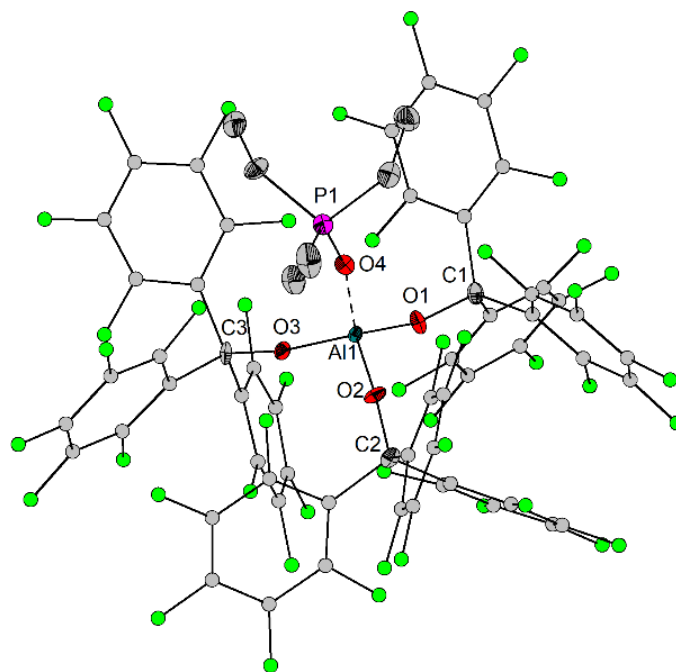

**Figure S4.** Molecular structure of  $\text{Al}(\text{OCArF}_3)_3 \cdot \text{OPET}_3$  (ellipsoids with 50% probability, balls with a arbitrarily fixed radius; hydrogen atoms are omitted for clarity, only one out of two molecules in the asymmetric unit is displayed). Bond parameters are not discussed due to the low quality of the crystal structure.

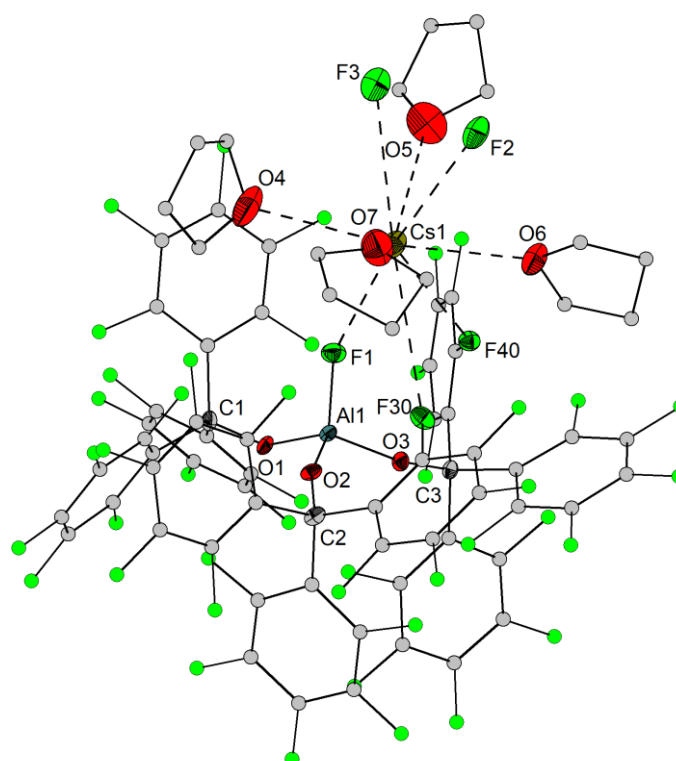

**Figure S5.** Molecular structure of  $[\text{Cs}(\text{THF})_4][\text{FAl}(\text{OCArF}_3)_3]$  (ellipsoids with 50% probability, balls with a arbitrarily fixed radius; hydrogen atoms omitted for clarity, only one out of two molecules in the asymmetric unit is displayed). Selected bond lengths /Å and angles /°: Al1-O1 1.739(2), Al1-O2 1.724(2), Al1-O3 1.718(2), Al1-F1 1.695(2), Cs1··F1 2.886(2), Cs1-O4 3.108(3), Cs1-O5 3.035(4), Cs1-O6 3.074(3), Cs1-O7 3.075(4), Al2-O8 1.723(2), Al2-O9 1.717(2), Al2-O10 1.734(3), Al2-F100 1.696(2), Cs2··F100 2.869(2), Cs2-O11 3.037(4), Cs2-O12 3.174(4), Cs2-O13 3.024(4), Cs2-O14 3.077(3), Al1-F1-Cs1 151.5(1), Al2-F100-Cs2 153.6(1).

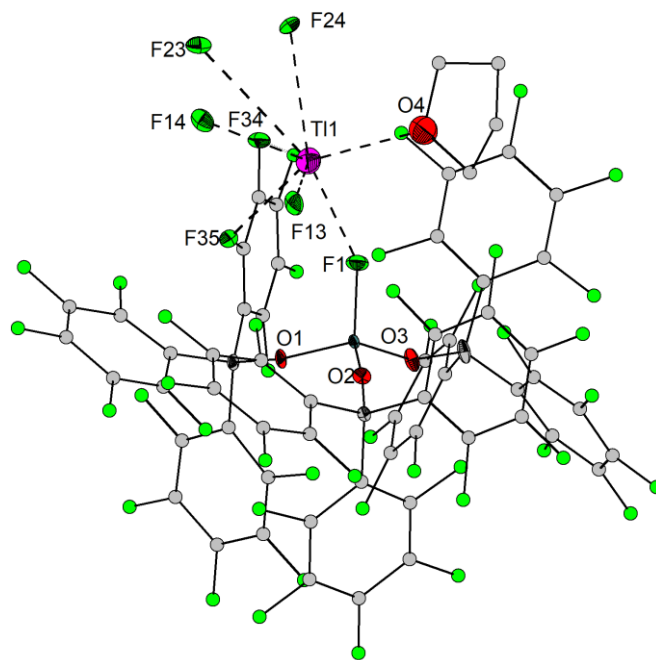

**Figure S6.** Molecular structure of  $[\text{Ti}(\text{THF})][\text{FAl}(\text{OCAr}^{\text{F}}_3)_3]$  (ellipsoids with 50% probability, balls with a arbitrarily fixed radius; hydrogen atoms omitted for clarity). Selected bond lengths /Å and angles /°: Al1-O1 1.716(2), Al1-O2 1.699(2), Al1-O3 1.720(2), Al1-F1 1.716(2), F1-Ti1 2.506(2), Ti1-O4 2.556(4), Al1-F1-Ti1 152.3(1).

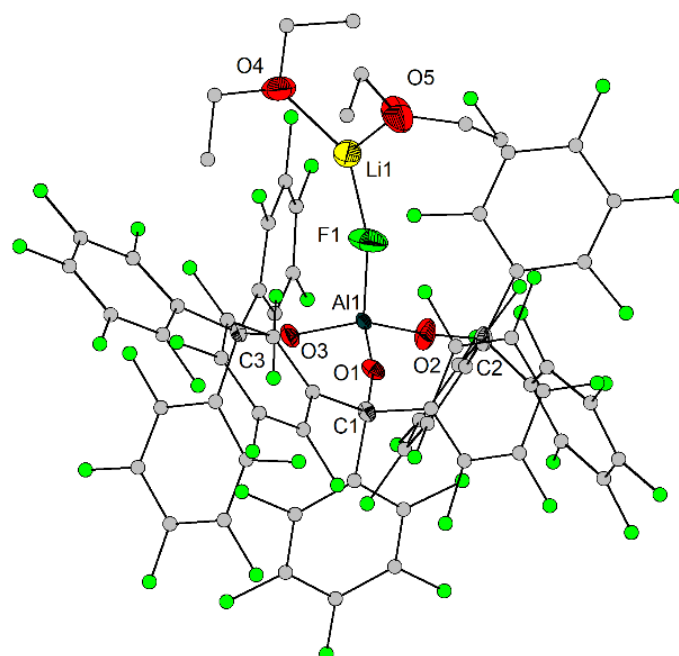

**Figure S7.** Molecular structure of  $[\text{Li}(\text{Et}_2\text{O})_2][\text{FAl}(\text{OCAr}^{\text{F}}_3)_3] \cdot 0.5\text{Et}_2\text{O}$  (ellipsoids with 50% probability, balls with a arbitrarily fixed radius; hydrogen and a non-coordinating ether molecule are omitted for clarity). Selected bond lengths /Å and angles /°: Al1-O1 1.727(2), Al1-O2 1.708(2), Al1-O3 1.708(2), Al1-F1 1.759(2), Li1...F1 1.828(6), Li1...O4 1.941(6), Li1...O5 1.980(6), Al1-F1-Li1 159.9(2).

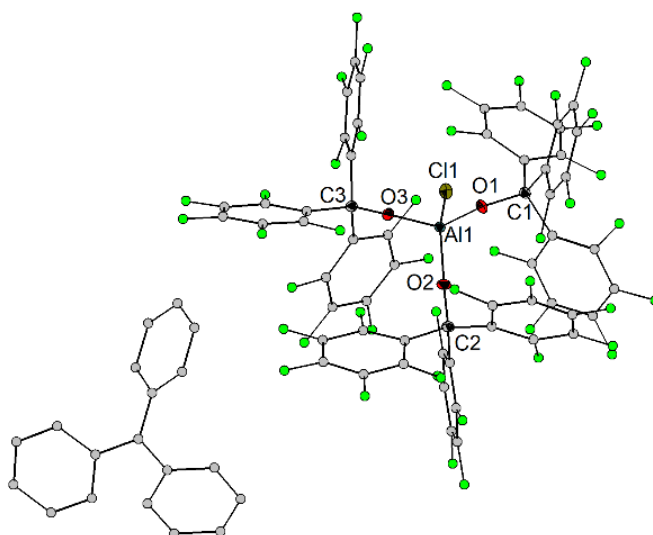

**Figure S8.** Molecular structure of  $[\text{Ph}_3\text{C}][\text{ClAl}(\text{OCAr}^{\text{F}_3})_3]$  (ellipsoids with 50% probability, balls with a arbitrarily fixed radius; hydrogen atoms omitted for clarity). Selected bond lengths /Å and angles /°: Al1-Cl1 2.1748(6), Al1-O1 1.729(1), Al1-O2 1.722(1), Al1-O3 1.711(1).

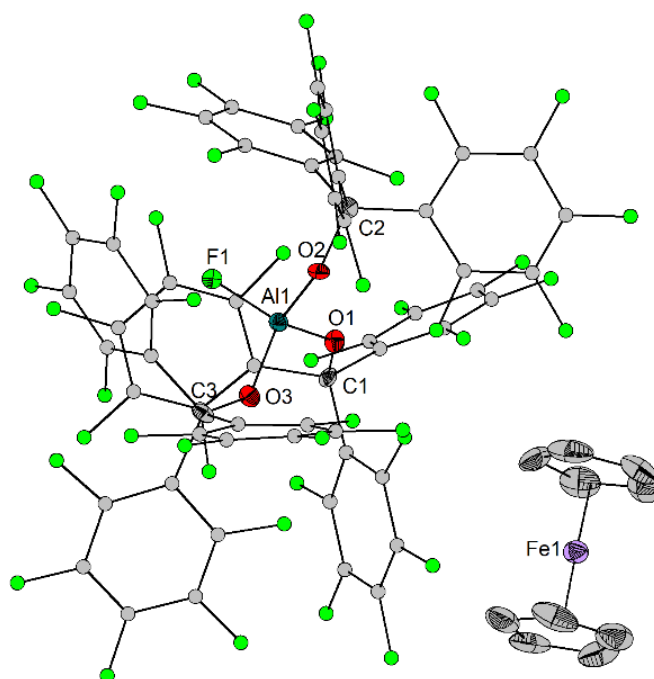

**Figure S9.** Molecular structure of  $[\text{FeCp}_2][\text{FAl}(\text{OCAr}^{\text{F}_3})_3]$  (ellipsoids with 50% probability, balls with a arbitrarily fixed radius; hydrogen atoms omitted for clarity). Selected bond lengths /Å and angles /°: Al1-F1 1.681(4), Al1-O1 1.743(5), Al1-O2 1.732(4), Al1-O3 1.739(5). Distances between Fe1 and the centroids of the Cp rings: 1.705(1) and 1.708(1) Å.

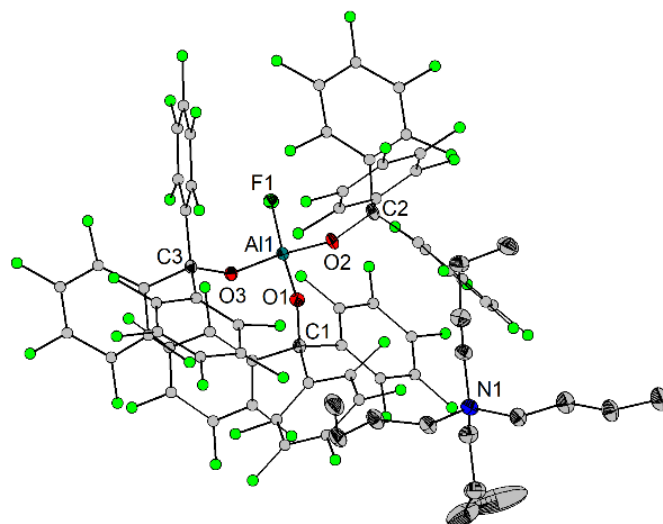

**Figure S10.** Molecular structure of  $[\text{NBu}_4][\text{FAI}(\text{OCAr}^{\text{F}_3})_3]$  (ellipsoids with 50% probability, balls with a arbitrarily fixed radius; hydrogen atoms omitted for clarity). Selected bond lengths /Å and angles /°: Al1-F1 1.678(1), Al1-O1 1.724(1), Al1-O2 1.744(1), Al1-O3 1.723(1).

**Table S1.** Crystal data and structure refinement.

|                                               | <b>Al(OCAr<sup>F</sup><sub>3</sub>)<sub>3</sub></b> | <b>Al(OCAr<sup>F</sup><sub>3</sub>)<sub>3</sub><br/>·MeCN·PhMe</b>                               | <b>Al(OCAr<sup>F</sup><sub>3</sub>)<sub>3</sub><br/>·THF·PhMe</b>                               |
|-----------------------------------------------|-----------------------------------------------------|--------------------------------------------------------------------------------------------------|-------------------------------------------------------------------------------------------------|
| empirical formula                             | C <sub>57</sub> AlF <sub>45</sub> O <sub>3</sub>    | C <sub>59</sub> H <sub>3</sub> AlF <sub>45</sub> NO <sub>3</sub> , C <sub>7</sub> H <sub>8</sub> | C <sub>61</sub> H <sub>8</sub> AlF <sub>45</sub> O <sub>4</sub> , C <sub>7</sub> H <sub>8</sub> |
| mol. weight [g mol <sup>-1</sup> ]            | 1614.55                                             | 1747.74                                                                                          | 1778.79                                                                                         |
| crystal habit                                 | colorless block                                     | colorless block                                                                                  | colorless block                                                                                 |
| crystal size [mm <sup>3</sup> ]               | 0.30 · 0.25 · 0.15                                  | 0.14 · 0.14 · 0.08                                                                               | 0.23 · 0.14 · 0.14                                                                              |
| crystal system                                | triclinic                                           | triclinic                                                                                        | triclinic                                                                                       |
| space group                                   | P -1                                                | P -1                                                                                             | P -1                                                                                            |
| a [Å]                                         | 13.5287(3)                                          | 13.2289(3)                                                                                       | 12.9745(6)                                                                                      |
| b [Å]                                         | 14.9354(3)                                          | 14.1466(3)                                                                                       | 14.9114(7)                                                                                      |
| c [Å]                                         | 15.4422(3)                                          | 17.4224(4)                                                                                       | 32.7214(15)                                                                                     |
| α [°]                                         | 87.6480(10)                                         | 86.2990(10)                                                                                      | 84.388(2)                                                                                       |
| β [°]                                         | 65.2530(10)                                         | 85.7940(10)                                                                                      | 88.756(2)                                                                                       |
| γ [°]                                         | 71.9140(10)                                         | 67.5030(10)                                                                                      | 88.372(2)                                                                                       |
| volume [Å <sup>3</sup> ]                      | 2679.32(10)                                         | 3001.90(12)                                                                                      | 6296.5(5)                                                                                       |
| Z                                             | 2                                                   | 2                                                                                                | 4                                                                                               |
| density [g cm <sup>-3</sup> ]                 | 2.001                                               | 1.934                                                                                            | 1.876                                                                                           |
| T [K]                                         | 100                                                 | 100                                                                                              | 100                                                                                             |
| absorption coeff. [mm <sup>-1</sup> ]         | 0.246                                               | 0.228                                                                                            | 0.220                                                                                           |
| Θ range [°]                                   | 2.51 to 30.10                                       | 2.23 to 30.09                                                                                    | 2.32 to 30.25                                                                                   |
| index ranges                                  | -18 ≤ h ≤ 18,<br>-20 ≤ k ≤ 20,<br>-20 ≤ l ≤ 20      | -18 ≤ h ≤ 18,<br>-19 ≤ k ≤ 19,<br>-24 ≤ l ≤ 24                                                   | -18 ≤ h ≤ 18,<br>-21 ≤ k ≤ 21,<br>-46 ≤ l ≤ 46                                                  |
| reflns collected                              | 245897                                              | 341249                                                                                           | 351222                                                                                          |
| independent reflns                            | 15751<br>[R(int) = 0.1021]                          | 17626<br>[R(int) = 0.0643]                                                                       | 36947<br>[R(int) = 0.0947]                                                                      |
| absorption correction                         | multi-scan                                          | multi-scan                                                                                       | multi-scan                                                                                      |
| max. and min. transmission                    | 0.7460 and 0.7162                                   | 0.7460 and 0.7046                                                                                | 0.7460 and 0.6971                                                                               |
| transmissiondata/restraints/<br>parameters    | 15751 / 0 / 955                                     | 17626 / 0 / 1047                                                                                 | 36947 / 0 / 2127                                                                                |
| goodness-of-fit on F <sup>2</sup>             | 1.016                                               | 1.037                                                                                            | 1.046                                                                                           |
| final R indices [I>2s(I)]                     | R1 = 0.0437                                         | R1 = 0.0345                                                                                      | R1 = 0.0700                                                                                     |
| R indices (all data)                          | wR2 = 0.0924                                        | wR2 = 0.0864                                                                                     | wR2 = 0.1762                                                                                    |
| larg. diff. peak/hole<br>[e Å <sup>-3</sup> ] | 0.402 / -0.308                                      | 0.487 / -0.304                                                                                   | 1.045 / -0.499                                                                                  |
| treatment of H atoms                          | none                                                | constr                                                                                           | constr                                                                                          |
| CCDC-number                                   | 1818681                                             | 1818682                                                                                          | 1818684                                                                                         |

**Table S1** (continued).

|                                               | <b>Al(OCAr<sup>F</sup><sub>3</sub>)<sub>3</sub>·Et<sub>2</sub>O</b>                              | <b>Al(OCAr<sup>F</sup><sub>3</sub>)<sub>3</sub><br/>·Pyridine</b> | <b>Al(OCAr<sup>F</sup><sub>3</sub>)<sub>3</sub>·OPEt<sub>3</sub></b> |
|-----------------------------------------------|--------------------------------------------------------------------------------------------------|-------------------------------------------------------------------|----------------------------------------------------------------------|
| empirical formula                             | C <sub>61</sub> H <sub>10</sub> AlF <sub>45</sub> O <sub>4</sub> , C <sub>7</sub> H <sub>8</sub> | C <sub>62</sub> H <sub>5</sub> AlF <sub>45</sub> NO <sub>3</sub>  | C <sub>63</sub> H <sub>15</sub> AlF <sub>45</sub> O <sub>4</sub> P   |
| mol. weight [g mol <sup>-1</sup> ]            | 1780.80                                                                                          | 1693.65                                                           | 1748.70                                                              |
| crystal habit                                 | colorless block                                                                                  | colorless block                                                   | colorless block                                                      |
| crystal size [mm <sup>3</sup> ]               | 0.3 · 0.2 · 0.1                                                                                  | 0.24 · 0.14 · 0.08                                                | 0.25 · 0.20 · 0.15                                                   |
| crystal system                                | triclinic                                                                                        | triclinic                                                         | monoclinic                                                           |
| space group                                   | P -1                                                                                             | P -1                                                              | P 21/c                                                               |
| a [Å]                                         | 12.4730(5)                                                                                       | 22.4236(10)                                                       | 24.8884(12)                                                          |
| b [Å]                                         | 12.4862(5)                                                                                       | 24.0454(11)                                                       | 23.4948(12)                                                          |
| c [Å]                                         | 24.3363(9)                                                                                       | 29.5270(14)                                                       | 22.4273(10)                                                          |
| α [°]                                         | 92.2640(10)                                                                                      | 91.684(2)                                                         | 90                                                                   |
| β [°]                                         | 102.0690(10)                                                                                     | 111.560(2)                                                        | 105.820(2)                                                           |
| γ [°]                                         | 109.5180(10)                                                                                     | 98.389(2)                                                         | 90                                                                   |
| volume [Å <sup>3</sup> ]                      | 3468.7(2)                                                                                        | 14588.4(12)                                                       | 12617.6(11)                                                          |
| Z                                             | 2                                                                                                | 10                                                                | 8                                                                    |
| density [g cm <sup>-3</sup> ]                 | 1.705                                                                                            | 1.928                                                             | 1.841                                                                |
| T [K]                                         | 100                                                                                              | 100                                                               | 100                                                                  |
| absorption coeff. [mm <sup>-1</sup> ]         | 0.200                                                                                            | 0.232                                                             | 0.242                                                                |
| Θ range [°]                                   | 2.16 to 25.03                                                                                    | 2.22 to 25.00                                                     | 2.17 to 26.00                                                        |
| index ranges                                  | -14 ≤ h ≤ 14,<br>-14 ≤ k ≤ 14,<br>-28 ≤ l ≤ 28                                                   | -26 ≤ h ≤ 26,<br>-28 ≤ k ≤ 28,<br>-34 ≤ l ≤ 35                    | -30 ≤ h ≤ 30,<br>-28 ≤ k ≤ 28,<br>-27 ≤ l ≤ 26                       |
| reflns collected                              | 121416                                                                                           | 553523                                                            | 411726                                                               |
| independent reflns                            | 12246<br>[R(int) = 0.0435]                                                                       | 51367<br>[R(int) = 0.0852]                                        | 24752<br>[R(int) = 0.1120]                                           |
| absorption correction                         | multi-scan                                                                                       | multi-scan                                                        | multi-scan                                                           |
| max. and min. transmission                    | 0.7455 and 0.6814                                                                                | 0.746 and 0.689                                                   | 0.7456 and 0.6137                                                    |
| transmissiondata/restraints/<br>parameters    | 12246 / 0 / 1067                                                                                 | 51367 / 18 / 5041                                                 | 24752 / 0 / 2060                                                     |
| goodness-of-fit on F <sup>2</sup>             | 1.043                                                                                            | 1.099                                                             | 1.128                                                                |
| final R indices [I>2σ(I)]                     | R1 = 0.0310                                                                                      | R1 = 0.0614                                                       | R1 = 0.0975                                                          |
| R indices (all data)                          | wR2 = 0.0842                                                                                     | wR2 = 0.1449                                                      | wR2 = 0.2412                                                         |
| larg. diff. peak/hole<br>[e Å <sup>-3</sup> ] | 0.435 and -0.291                                                                                 | 0.907 / -0.692                                                    | 1.076 / -0.721                                                       |
| treatment of H atoms                          | constr                                                                                           | constr                                                            | constr                                                               |
| CCDC-number                                   | 1863847                                                                                          | 1866467                                                           | 1863848                                                              |



**Table S1** (continued).

|                                               | [Cs(THF) <sub>4</sub> ]<br>[FAl(OCaF <sub>3</sub> ) <sub>3</sub> ] | [Ag(MeCN)(Et <sub>2</sub> O)]<br>[FAl(OCaF <sub>3</sub> ) <sub>3</sub> ] | [Tl(THF)]<br>[FAl(OCaF <sub>3</sub> ) <sub>3</sub> ]               |
|-----------------------------------------------|--------------------------------------------------------------------|--------------------------------------------------------------------------|--------------------------------------------------------------------|
| empirical formula                             | C <sub>73</sub> H <sub>32</sub> AlCsF <sub>46</sub> O <sub>7</sub> | C <sub>63</sub> H <sub>13</sub> AgAlF <sub>46</sub> NO <sub>4</sub>      | C <sub>61</sub> H <sub>8</sub> AlF <sub>46</sub> O <sub>4</sub> Tl |
| mol. weight [g mol <sup>-1</sup> ]            | 2054.87                                                            | 1856.59                                                                  | 1910.02                                                            |
| crystal habit                                 | colorless block                                                    | colorless block                                                          | colorless block                                                    |
| crystal size [mm <sup>3</sup> ]               | 0.30 · 0.30 · 0.20                                                 | 0.20 · 0.20 · 0.15                                                       | 0.07 · 0.07 · 0.05                                                 |
| crystal system                                | triclinic                                                          | monoclinic                                                               | triclinic                                                          |
| space group                                   | P -1                                                               | P 1 21/c 1                                                               | P -1                                                               |
| a [Å]                                         | 13.4499(5)                                                         | 11.7732(3)                                                               | 12.8874(3)                                                         |
| b [Å]                                         | 13.5054(5)                                                         | 24.2075(7)                                                               | 13.3620(4)                                                         |
| c [Å]                                         | 44.2327(16)                                                        | 21.9598(6)                                                               | 19.1533(5)                                                         |
| α [°]                                         | 98.1980(10)                                                        | 90                                                                       | 81.2440(10)                                                        |
| β [°]                                         | 92.5750(10)                                                        | 90.5680(10)                                                              | 86.3460(10)                                                        |
| γ [°]                                         | 90.2870(10)                                                        | 90                                                                       | 65.3350(10)                                                        |
| volume [Å <sup>3</sup> ]                      | 7944.0(5)                                                          | 6258.2(3)                                                                | 2962.38(14)                                                        |
| Z                                             | 4                                                                  | 4                                                                        | 2                                                                  |
| density [g cm <sup>-3</sup> ]                 | 1.718                                                              | 1.970                                                                    | 2.141                                                              |
| T [K]                                         | 100                                                                | 100                                                                      | 100                                                                |
| absorption coeff. [mm <sup>-1</sup> ]         | 0.638                                                              | 0.527                                                                    | 2.939                                                              |
| Θ range [°]                                   | 2.21 to 26.00                                                      | 2.41 to 27.50                                                            | 2.15 to 30.05                                                      |
| index ranges                                  | -16 ≤ h ≤ 16,<br>-16 ≤ k ≤ 16,<br>-54 ≤ l ≤ 54                     | -15 ≤ h ≤ 15,<br>-31 ≤ k ≤ 31,<br>-28 ≤ l ≤ 28                           | -18 ≤ h ≤ 18,<br>-18 ≤ k ≤ 18,<br>-26 ≤ l ≤ 26                     |
| reflns collected                              | 535842                                                             | 356555                                                                   | 214376                                                             |
| independent reflns                            | 31254<br>[R(int) = 0.0912]                                         | 14369<br>[R(int) = 0.0425]                                               | 17307<br>[R(int) = 0.0565]                                         |
| absorption correction                         | multi-scan                                                         | multi-scan                                                               | multi-scan                                                         |
| max. and min. transmission                    | 0.7462 and 0.6808                                                  | 0.7461 and 0.7014                                                        | 0.7460 and 0.6591                                                  |
| transmissiondata/restraints/<br>parameters    | 31254 / 0 / 2306                                                   | 14369 / 0 / 1056                                                         | 17307 / 0 / 1018                                                   |
| goodness-of-fit on F <sup>2</sup>             | 1.080                                                              | 1.100                                                                    | 1.035                                                              |
| final R indices [I>2s(I)]                     | R1 = 0.0550                                                        | R1 = 0.0297                                                              | R1 = 0.0449                                                        |
| R indices (all data)                          | wR2 = 0.1140                                                       | wR2 = 0.0709                                                             | wR2 = 0.1121                                                       |
| larg. diff. peak/hole<br>[e Å <sup>-3</sup> ] | 1.338 / -1.736                                                     | 0.702 / -0.599                                                           | 4.010 / -3.358                                                     |
| treatment of H atoms                          | constr                                                             | constr                                                                   | constr                                                             |
| CCDC-number                                   | 1818683                                                            | 1818687                                                                  | 1818685                                                            |

**Table S1** (continued).

|                                               | <b>[Ph<sub>3</sub>C]</b><br><b>[FAl(OCaF<sub>3</sub>)<sub>3</sub>]</b><br><b>·CH<sub>2</sub>Cl<sub>2</sub></b> | <b>[Ph<sub>3</sub>C]</b><br><b>[ClAl(OCaF<sub>3</sub>)<sub>3</sub>]</b> | <b>[Li(Et<sub>2</sub>O)<sub>2</sub>]</b><br><b>[FAl(OCaF<sub>3</sub>)<sub>3</sub>]</b><br><b>·0.5Et<sub>2</sub>O</b>      |
|-----------------------------------------------|----------------------------------------------------------------------------------------------------------------|-------------------------------------------------------------------------|---------------------------------------------------------------------------------------------------------------------------|
| empirical formula                             | C <sub>76</sub> H <sub>15</sub> AlF <sub>46</sub> O <sub>3</sub> ,<br>CH <sub>2</sub> Cl <sub>2</sub>          | C <sub>76</sub> H <sub>15</sub> AlClF <sub>45</sub> O <sub>3</sub>      | C <sub>65</sub> H <sub>20</sub> AlF <sub>46</sub> LiO <sub>5</sub> ,<br>(C <sub>4</sub> H <sub>10</sub> O) <sub>0.5</sub> |
| mol. weight [g mol <sup>-1</sup> ]            | 1961.79                                                                                                        | 1893.31                                                                 | 1825.79                                                                                                                   |
| crystal habit                                 | yellow block                                                                                                   | yellow block                                                            | colorless block                                                                                                           |
| crystal size [mm <sup>3</sup> ]               | 0.20 · 0.20 · 0.15                                                                                             | 0.43 · 0.35 · 0.28                                                      | 0.06 · 0.06 · 0.05                                                                                                        |
| crystal system                                | triclinic                                                                                                      | triclinic                                                               | monoclinic                                                                                                                |
| space group                                   | P -1                                                                                                           | P -1                                                                    | P 2(1)/n                                                                                                                  |
| a [Å]                                         | 11.8720(2)                                                                                                     | 13.8546(4)                                                              | 13.5375(3)                                                                                                                |
| b [Å]                                         | 13.5786(3)                                                                                                     | 14.2421(4)                                                              | 24.2062(5)                                                                                                                |
| c [Å]                                         | 22.6501(4)                                                                                                     | 20.1247(6)                                                              | 20.9262(4)                                                                                                                |
| α [°]                                         | 83.4410(10)                                                                                                    | 94.5130(10)                                                             | 90                                                                                                                        |
| β [°]                                         | 84.2750(10)                                                                                                    | 96.0290(10)                                                             | 104.0200(10)                                                                                                              |
| γ [°]                                         | 85.1470(10)                                                                                                    | 119.0260(10)                                                            | 90                                                                                                                        |
| volume [Å <sup>3</sup> ]                      | 3599.41(12)                                                                                                    | 3414.42(17)                                                             | 6653.1(2)                                                                                                                 |
| Z                                             | 2                                                                                                              | 2                                                                       | 4                                                                                                                         |
| density [g cm <sup>-3</sup> ]                 | 1.810                                                                                                          | 1.842                                                                   | 1.823                                                                                                                     |
| T [K]                                         | 100                                                                                                            | 100                                                                     | 100                                                                                                                       |
| absorption coeff. [mm <sup>-1</sup> ]         | 0.275                                                                                                          | 0.246                                                                   | 0.214                                                                                                                     |
| Θ range [°]                                   | 2.21 to 28.58                                                                                                  | 2.44 to 28.36                                                           | 2.18 to 30.07                                                                                                             |
| index ranges                                  | -15 ≤ h ≤ 15,<br>-18 ≤ k ≤ 18,<br>-30 ≤ l ≤ 30                                                                 | -18 ≤ h ≤ 18,<br>-19 ≤ k ≤ 19,<br>-26 ≤ l ≤ 26                          | -19 ≤ h ≤ 19,<br>-34 ≤ k ≤ 34,<br>-29 ≤ l ≤ 29                                                                            |
| reflns collected                              | 244883                                                                                                         | 154736                                                                  | 753649                                                                                                                    |
| independent reflns                            | 18346<br>[R(int) = 0.0613]                                                                                     | 17021<br>[R(int) = 0.0545]                                              | 19478 [R(int) =<br>0.0878]                                                                                                |
| absorption correction                         | multi-scan                                                                                                     | multi-scan                                                              | multi-scan                                                                                                                |
| max. and min. transmission                    | 0.7457 and 0.7159                                                                                              | 0.7457 and 0.6940                                                       | 0.7460 and 0.7112                                                                                                         |
| transmissiondata/restraints/<br>parameters    | 18346 / 0 / 1162                                                                                               | 17021 / 0 / 1135                                                        | 19478 / 0 / 1106                                                                                                          |
| goodness-of-fit on F <sup>2</sup>             | 1.096                                                                                                          | 1.014                                                                   | 1.061                                                                                                                     |
| final R indices [I>2σ(I)]                     | R1 = 0.0439                                                                                                    | R1 = 0.0388                                                             | R1 = 0.0617                                                                                                               |
| R indices (all data)                          | wR2 = 0.0916                                                                                                   | wR2 = 0.0836                                                            | wR2 = 0.1675                                                                                                              |
| larg. diff. peak/hole<br>[e Å <sup>-3</sup> ] | 0.370 / -0.542                                                                                                 | 0.349 / -0.331                                                          | 1.883 / -1.253                                                                                                            |
| treatment of H atoms                          | constr                                                                                                         | constr                                                                  | constr                                                                                                                    |
| CCDC-number                                   | 1818686                                                                                                        | 1863850                                                                 | 1863849                                                                                                                   |

**Table S1** (continued).

|                                               | <b>[FeCp<sub>2</sub>]<br/>[FAl(OCAr<sup>F</sup><sub>3</sub>)<sub>3</sub>]</b> | <b>[NBu<sub>4</sub>]<br/>[FAl(OCAr<sup>F</sup><sub>3</sub>)<sub>3</sub>]</b>         |
|-----------------------------------------------|-------------------------------------------------------------------------------|--------------------------------------------------------------------------------------|
| empirical formula                             | C <sub>67</sub> H <sub>10</sub> AlF <sub>46</sub> FeO <sub>3</sub>            | C <sub>57</sub> AlF <sub>46</sub> O <sub>3</sub> , C <sub>16</sub> H <sub>36</sub> N |
| mol. weight [g mol <sup>-1</sup> ]            | 1819.58                                                                       | 1876.01                                                                              |
| crystal habit                                 | blue block                                                                    | colorless block                                                                      |
| crystal size [mm <sup>3</sup> ]               | 0.15 · 0.15 · 0.10                                                            | 0.30 · 0.30 · 0.10                                                                   |
| crystal system                                | triclinic                                                                     | triclinic                                                                            |
| space group                                   | P 1                                                                           | P -1                                                                                 |
| a [Å]                                         | 11.6429(4)                                                                    | 13.3297(5)                                                                           |
| b [Å]                                         | 11.6834(4)                                                                    | 14.3059(4)                                                                           |
| c [Å]                                         | 12.0655(4)                                                                    | 22.5568(8)                                                                           |
| α [°]                                         | 97.981(2)                                                                     | 71.8670(10)                                                                          |
| β [°]                                         | 101.382(2)                                                                    | 75.4450(10)                                                                          |
| γ [°]                                         | 98.800(2)                                                                     | 63.6220(10)                                                                          |
| volume [Å <sup>3</sup> ]                      | 1565.64(9)                                                                    | 3629.8(2)                                                                            |
| Z                                             | 1                                                                             | 2                                                                                    |
| density [g cm <sup>-3</sup> ]                 | 1.930                                                                         | 1.716                                                                                |
| T [K]                                         | 100                                                                           | 100                                                                                  |
| absorption coeff. [mm <sup>-1</sup> ]         | 0.445                                                                         | 0.197                                                                                |
| Θ range [°]                                   | 2.22 to 28.47                                                                 | 2.34 to 28.38                                                                        |
| index ranges                                  | -15 ≤ h ≤ 15,<br>-15 ≤ k ≤ 15,<br>-16 ≤ l ≤ 16                                | -17 ≤ h ≤ 17,<br>-18 ≤ k ≤ 19,<br>-30 ≤ l ≤ 30                                       |
| reflns collected                              | 36831                                                                         | 195049                                                                               |
| independent reflns                            | 15488<br>[R(int) = 0.0716]                                                    | 18093 [R(int) =<br>0.0415]                                                           |
| absorption correction                         | multi-scan                                                                    | multi-scan                                                                           |
| max. and min. transmission                    | 0.7457 and 0.6743                                                             | 0.7456 and 0.6681                                                                    |
| transmissiondata/restraints/<br>parameters    | 15488 / 0 / 1063                                                              | 18093 / 0 / 1121                                                                     |
| goodness-of-fit on F <sup>2</sup>             | 1.023                                                                         | 1.054                                                                                |
| final R indices [I>2σ(I)]                     | R1 = 0.0539                                                                   | R1 = 0.0389                                                                          |
| R indices (all data)                          | wR2 = 0.1377                                                                  | wR2 = 0.0906                                                                         |
| larg. diff. peak/hole<br>[e Å <sup>-3</sup> ] | 0.653 / -0.505                                                                | 0.491 / -0.369                                                                       |
| treatment of H atoms                          | constr                                                                        | constr.                                                                              |
| CCDC-number                                   | 1863852                                                                       | 1863851                                                                              |

## <sup>19</sup>F NMR Spectra

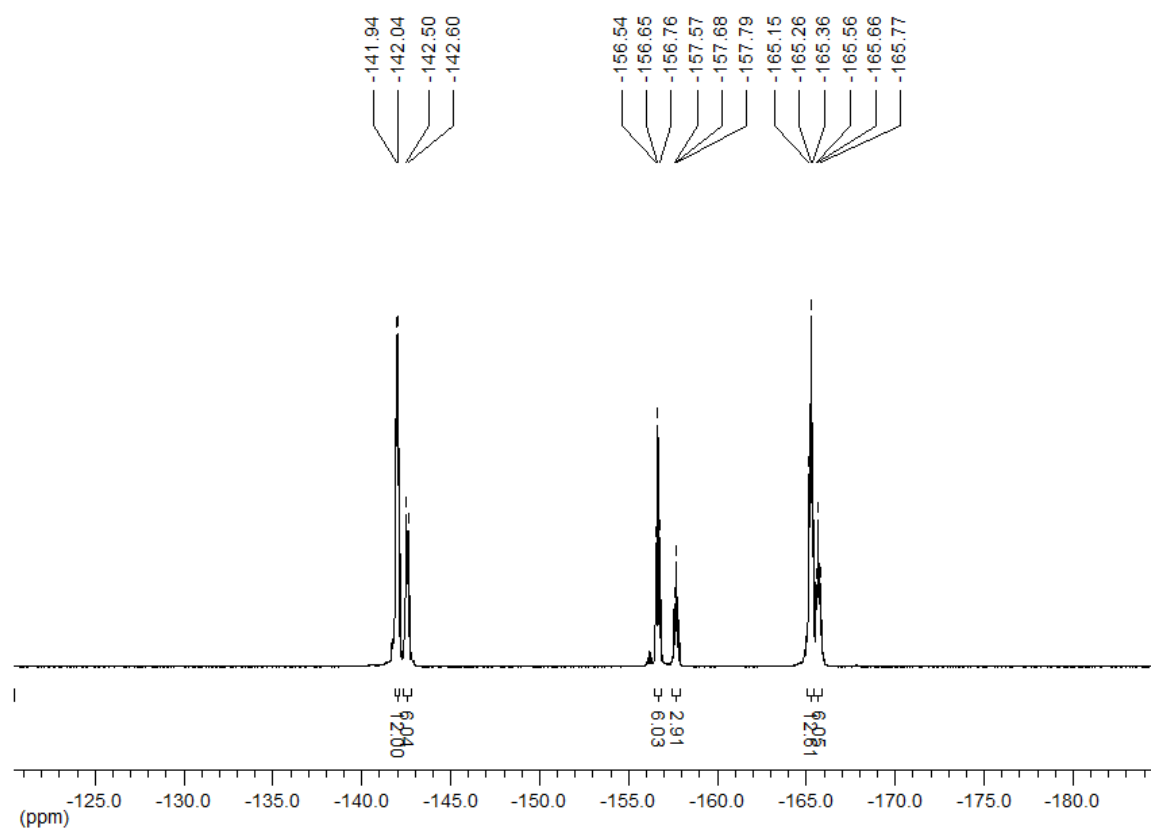

**Figure S11.** <sup>19</sup>F NMR spectrum of Al(OCAr<sup>F</sup><sub>3</sub>)<sub>3</sub>·THFd<sub>8</sub> (188 MHz, THF-d<sub>8</sub>, 20 °C).

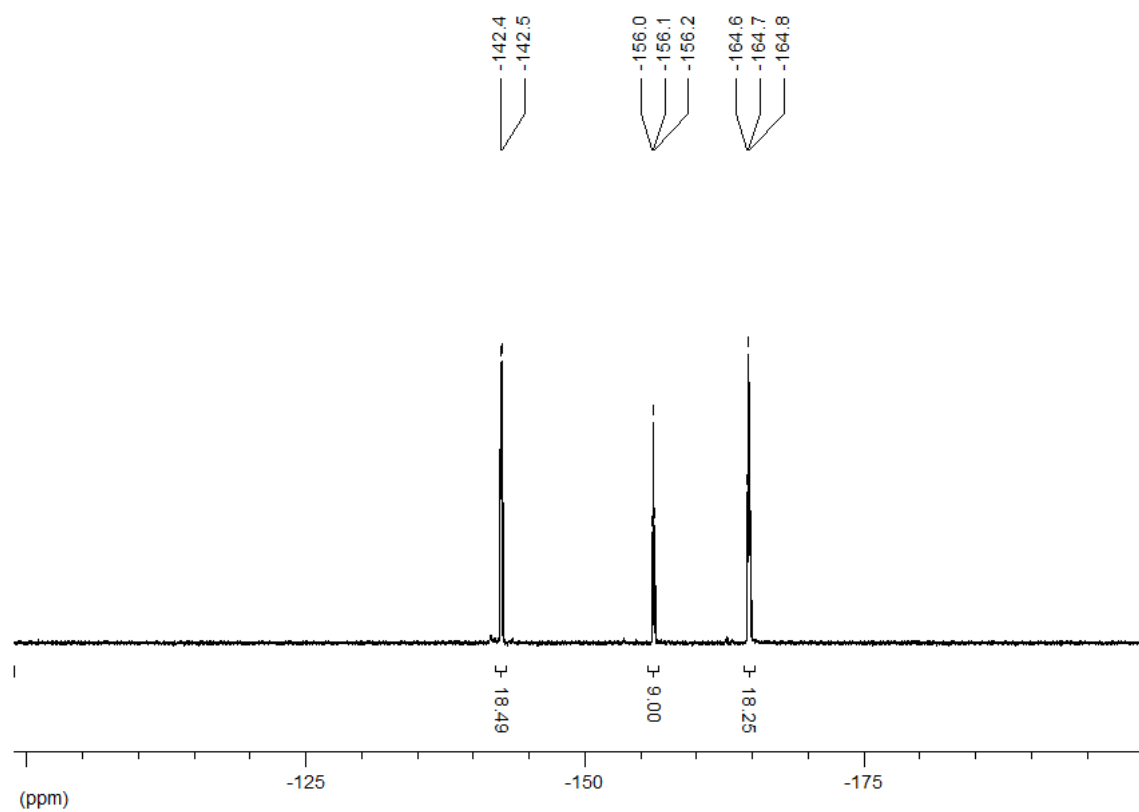

**Figure S12.** <sup>19</sup>F NMR spectrum of Al(OCAr<sup>F</sup><sub>3</sub>)<sub>3</sub>·MeCN·PhMe (188 MHz, CD<sub>2</sub>Cl<sub>2</sub>, 20 °C).

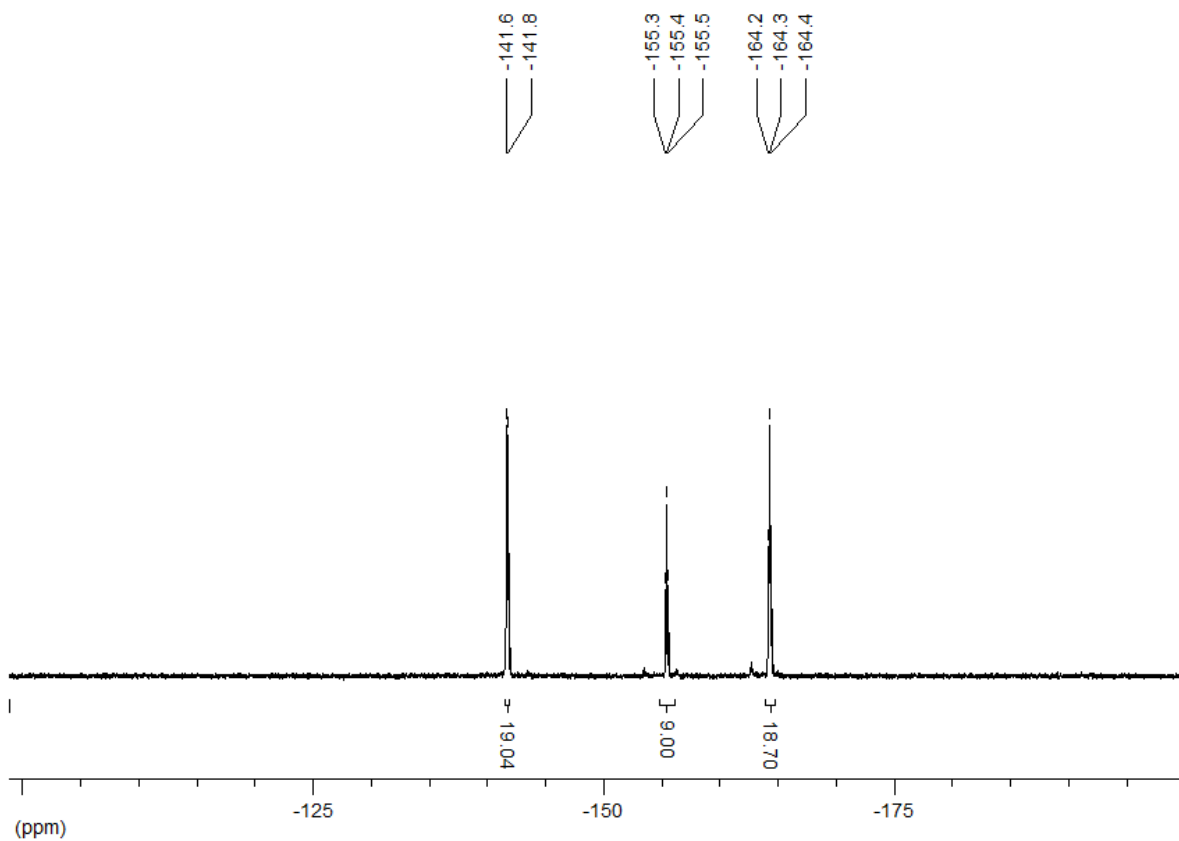

**Figure S13.**  $^{19}\text{F}$  NMR spectrum of  $\text{Al}(\text{OCAr}^{\text{F}_3})_3 \cdot \text{THF}$  (188 MHz,  $\text{CD}_2\text{Cl}_2$ , 20 °C).

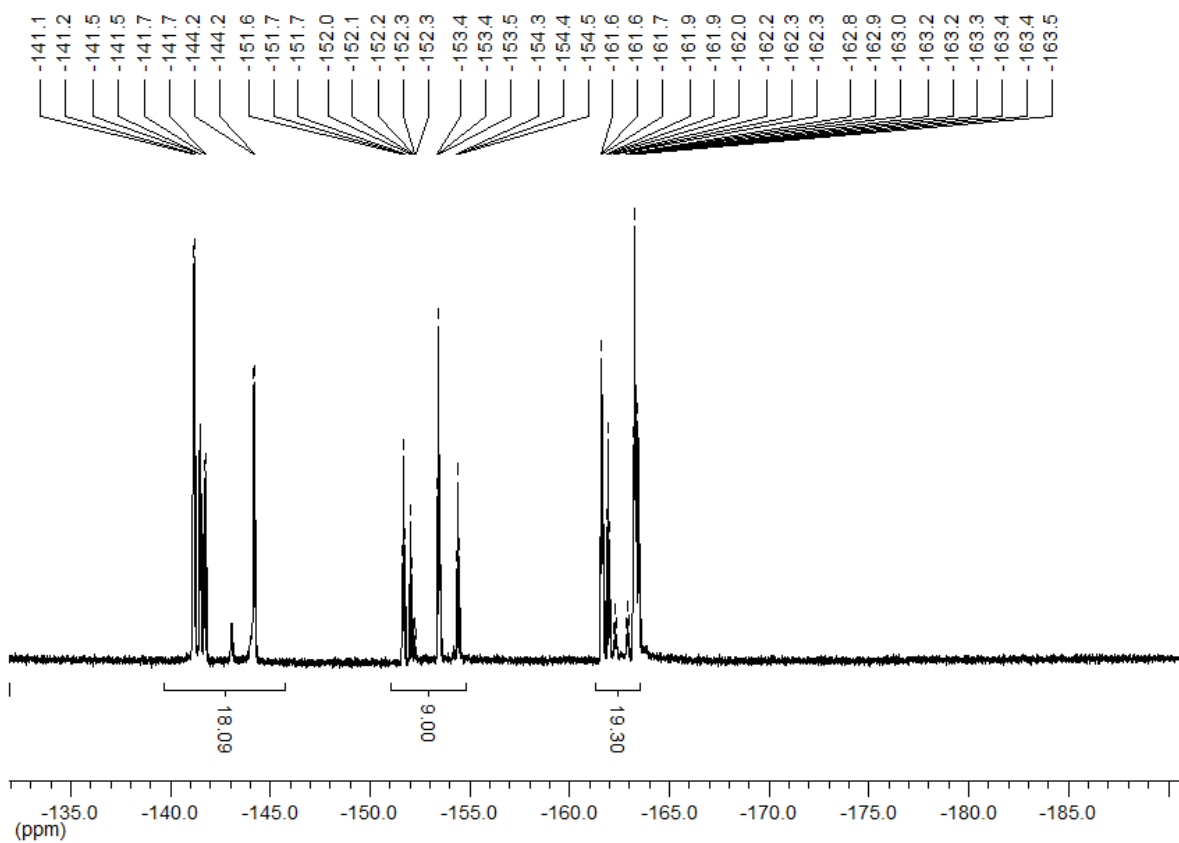

**Figure S14.**  $^{19}\text{F}$  NMR spectrum of  $\text{Al}(\text{OCAr}^{\text{F}_3})_3 \cdot \text{Et}_2\text{O}$  (188 MHz,  $\text{C}_6\text{D}_6$ , 20 °C).

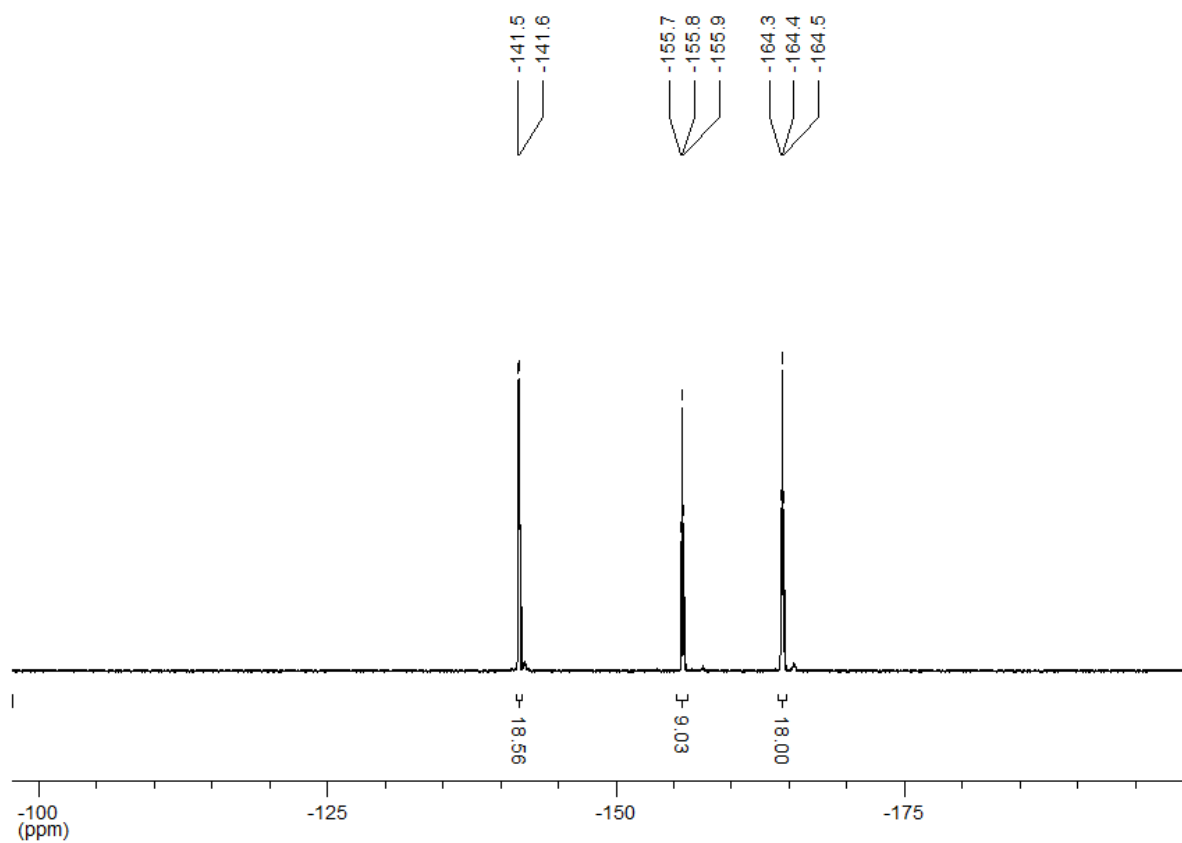

**Figure S15.**  $^{19}\text{F}$  NMR spectrum of  $\text{Al}(\text{OCAr}^{\text{F}_3})_3 \cdot \text{pyridine}$  (188 MHz,  $\text{CD}_2\text{Cl}_2$ , 20 °C).

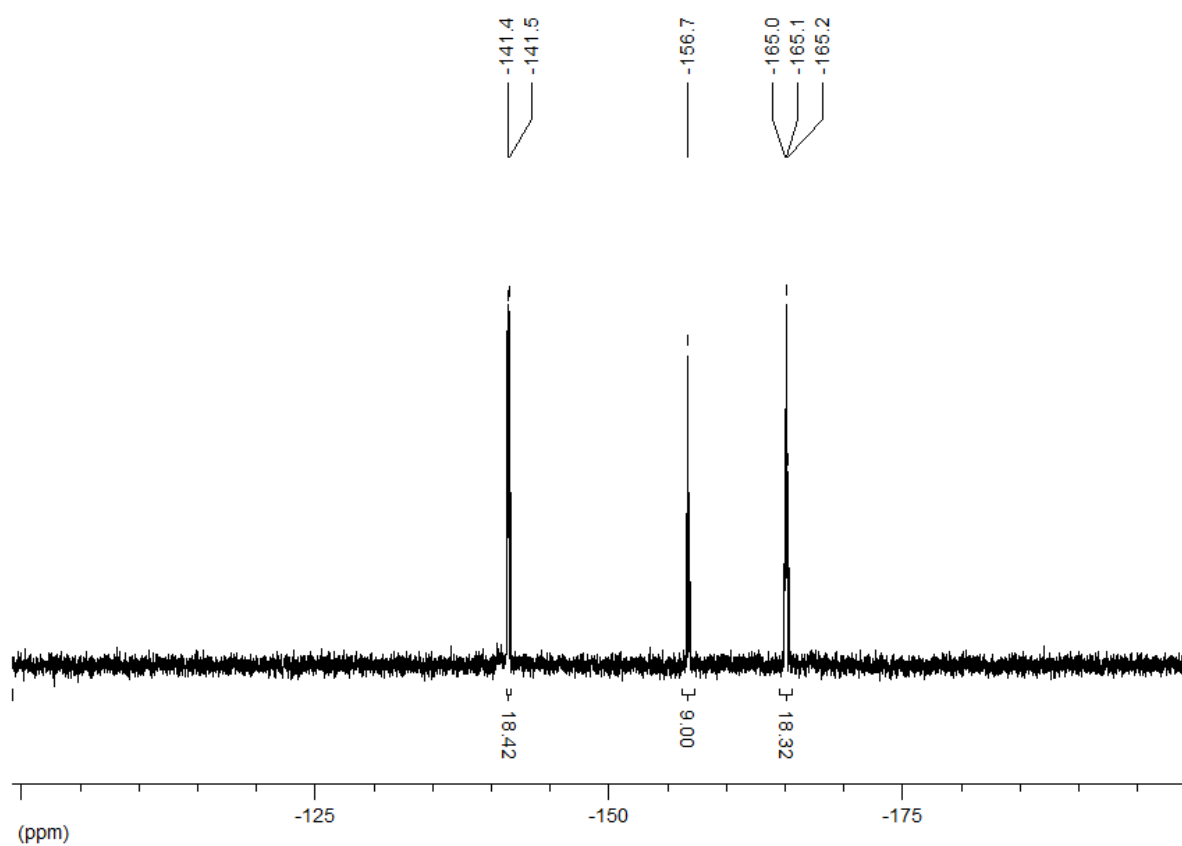

**Figure S16.**  $^{19}\text{F}$  NMR spectrum of  $\text{Al}(\text{OCAr}^{\text{F}_3})_3 \cdot \text{OPEt}_3$  (188 MHz,  $\text{CD}_2\text{Cl}_2$ , 20 °C).

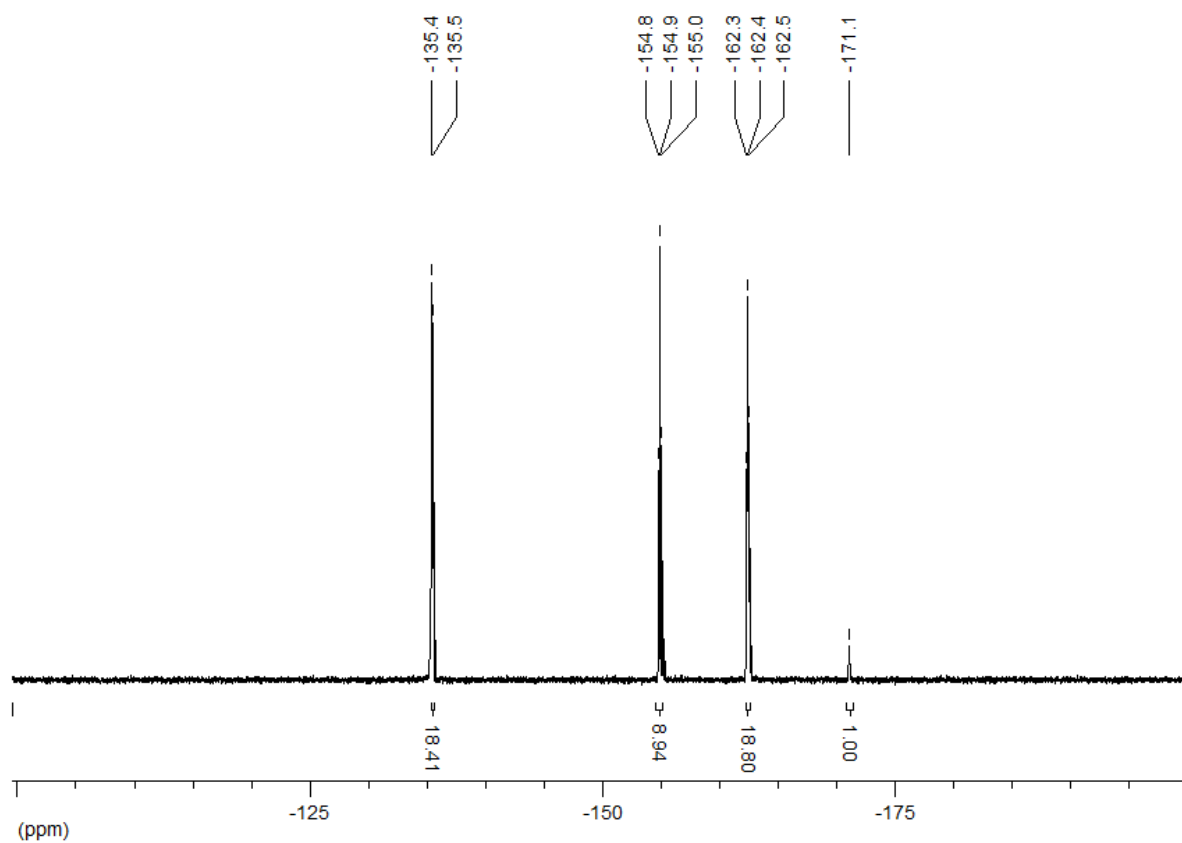

**Figure S17.**  $^{19}\text{F}$  NMR spectrum of  $[\text{Cs}(\text{THF})][\text{FAl}(\text{OCAr}^{\text{F}}_3)_3]$  (188 MHz,  $[\text{D}_3]\text{MeCN}$ , 20 °C).

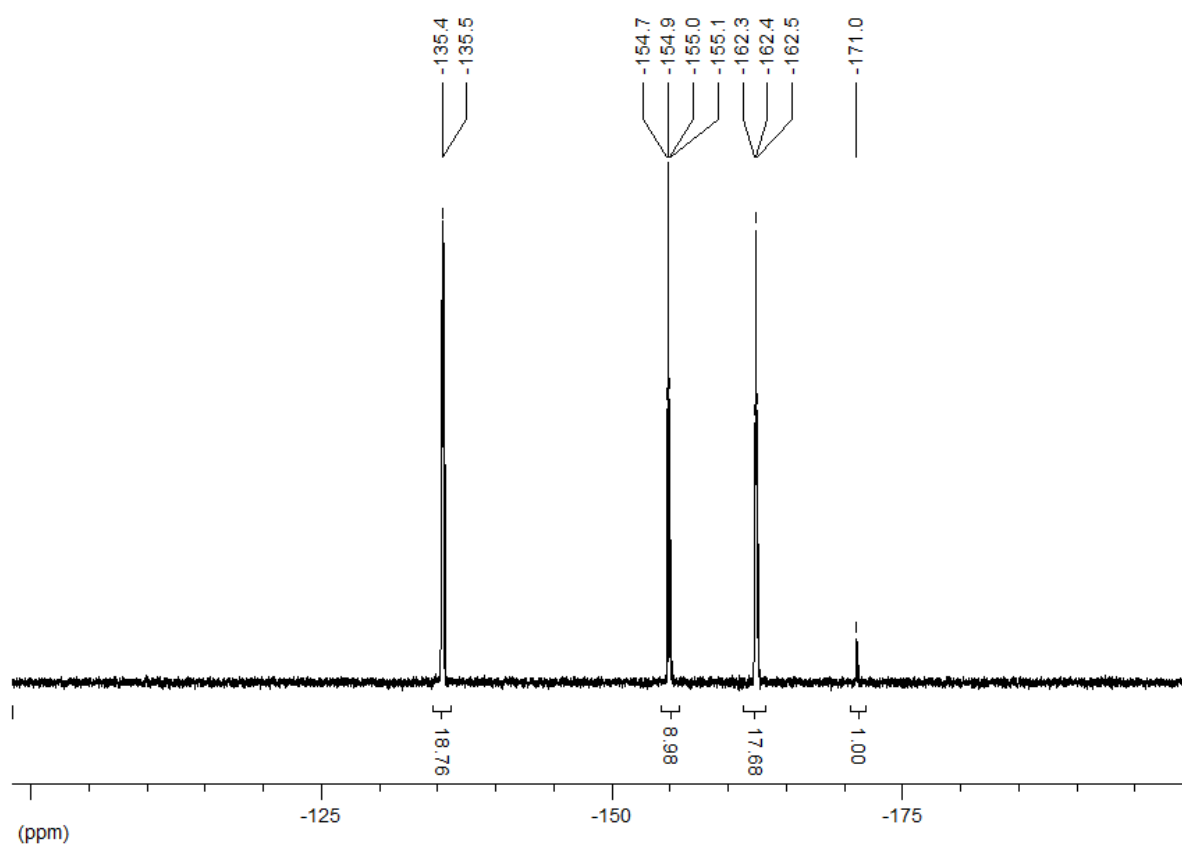

**Figure S18.**  $^{19}\text{F}$  NMR spectrum of  $[\text{Ag}(\text{Et}_2\text{O})(\text{MeCN})][\text{FAl}(\text{OCAr}^{\text{F}}_3)_3]$  (188 MHz,  $[\text{D}_3]\text{MeCN}$ , 20 °C).

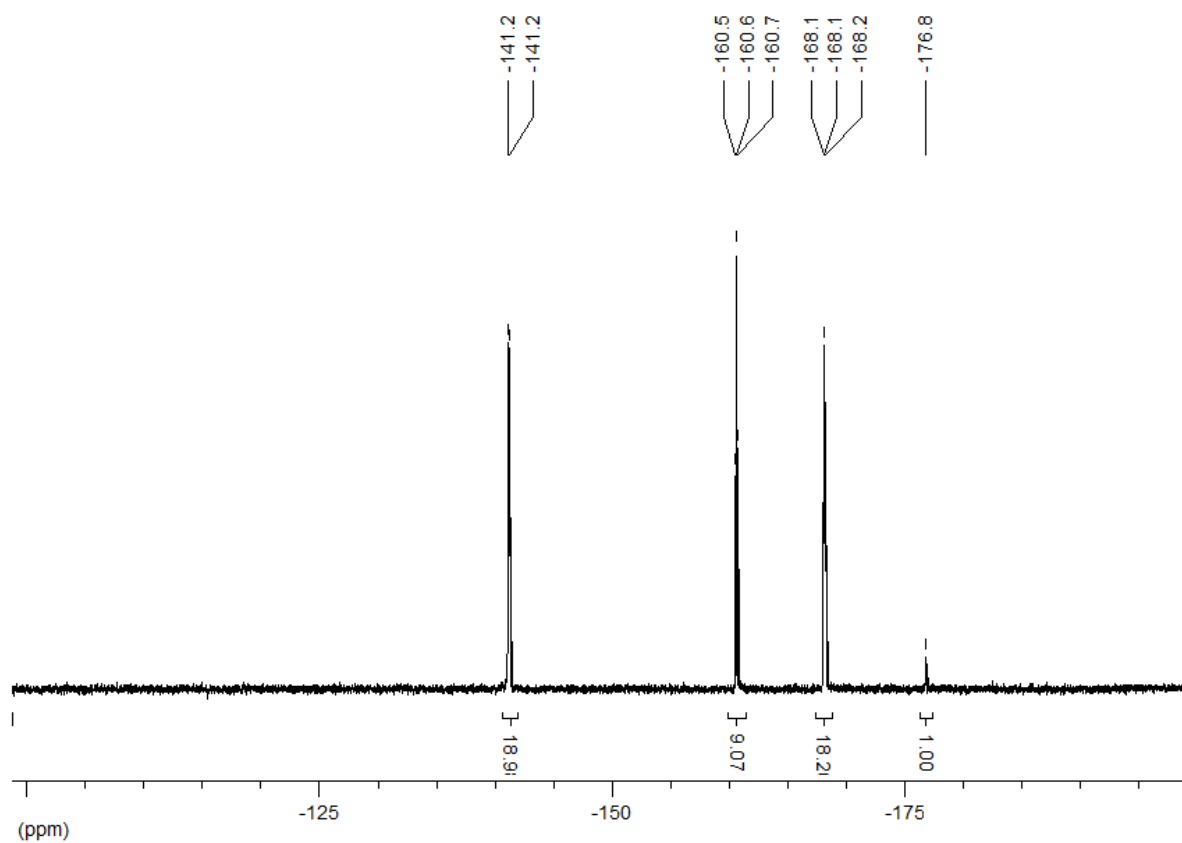

**Figure S19.**  $^{19}\text{F}$  NMR spectrum of  $[\text{Ti}(\text{MeCN})][\text{FAl}(\text{OCAr}^{\text{F}_3})_3]$  (188 MHz,  $[\text{D}_3]\text{MeCN}$ , 20 °C).

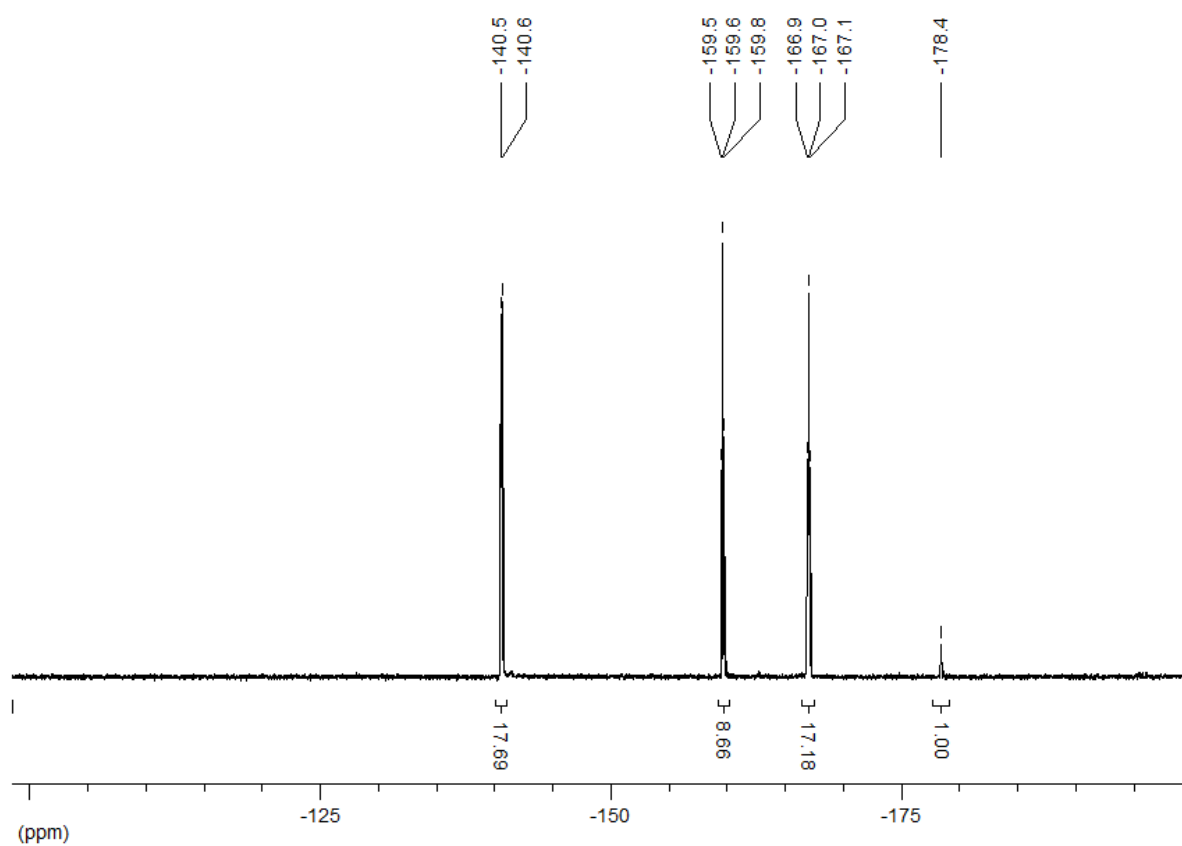

**Figure S20.**  $^{19}\text{F}$  NMR spectrum of  $[\text{S}(\text{NMe}_2)_3][\text{FAl}(\text{OC}(\text{C}_6\text{F}_5)_3)_3]$  (188 MHz,  $\text{CD}_2\text{Cl}_2$ , 20 °C).



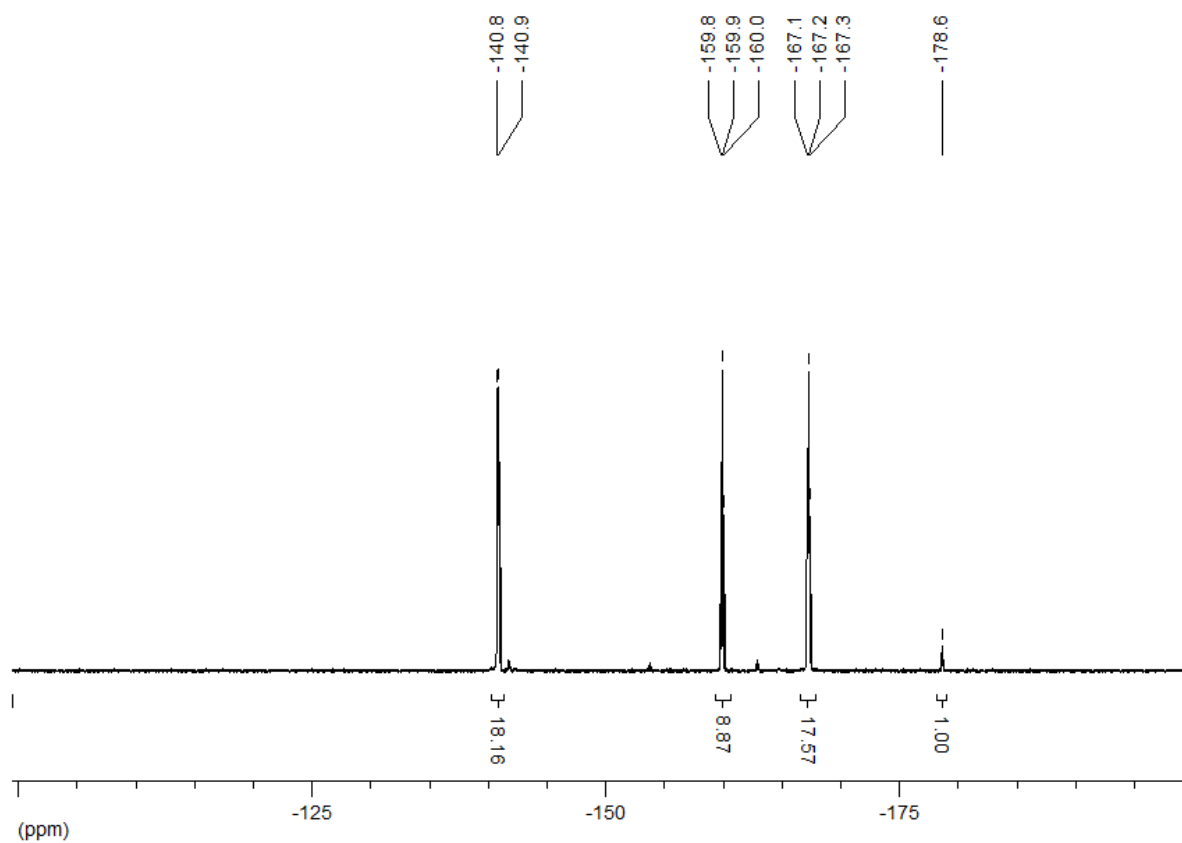

**Figure S21.**  $^{19}\text{F}$  NMR spectrum of  $[\text{Ph}_3\text{C}][\text{FAl}(\text{OCAr}^{\text{F}_3})_3]$  (188 MHz,  $\text{CD}_2\text{Cl}_2$ , 20 °C).

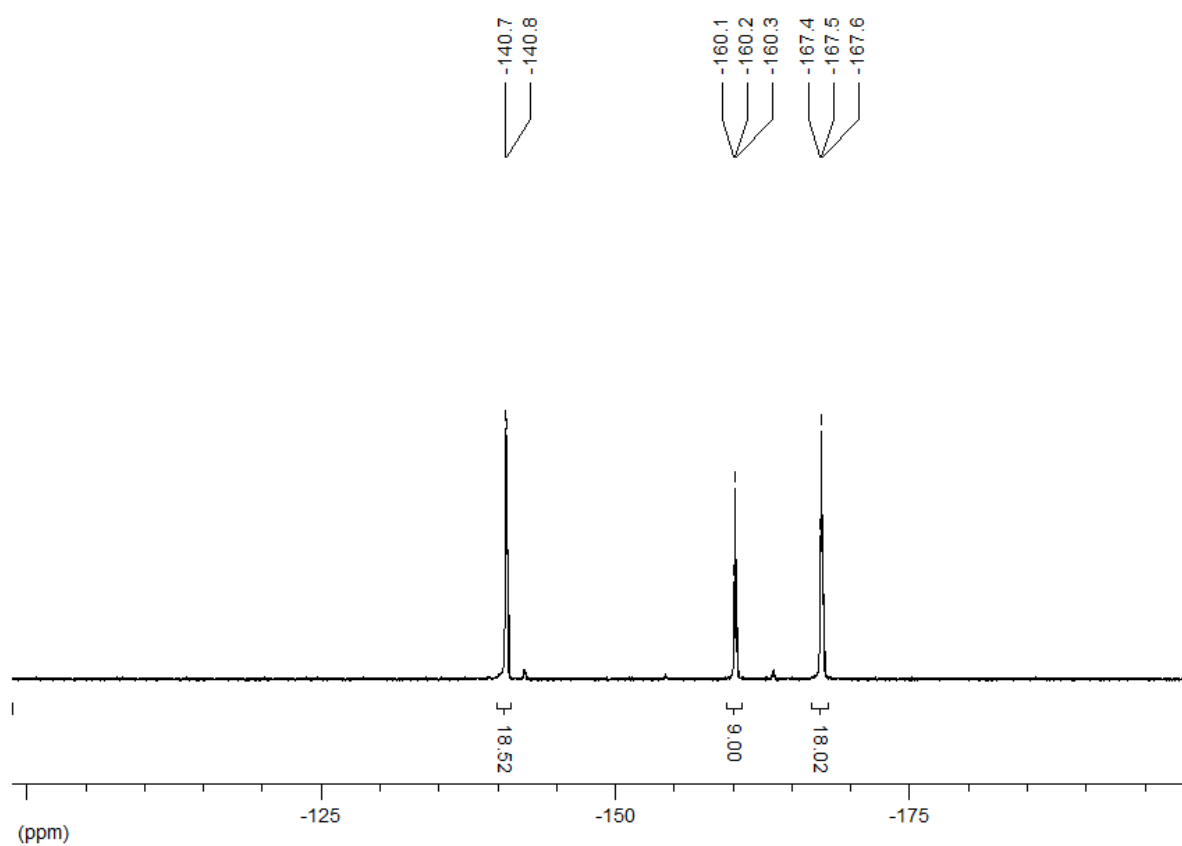

**Figure S22.**  $^{19}\text{F}$  NMR spectrum of  $[\text{Ph}_3\text{C}][\text{ClAl}(\text{OCAr}^{\text{F}_3})_3]$  (188 MHz,  $\text{CD}_2\text{Cl}_2$ , 20 °C).

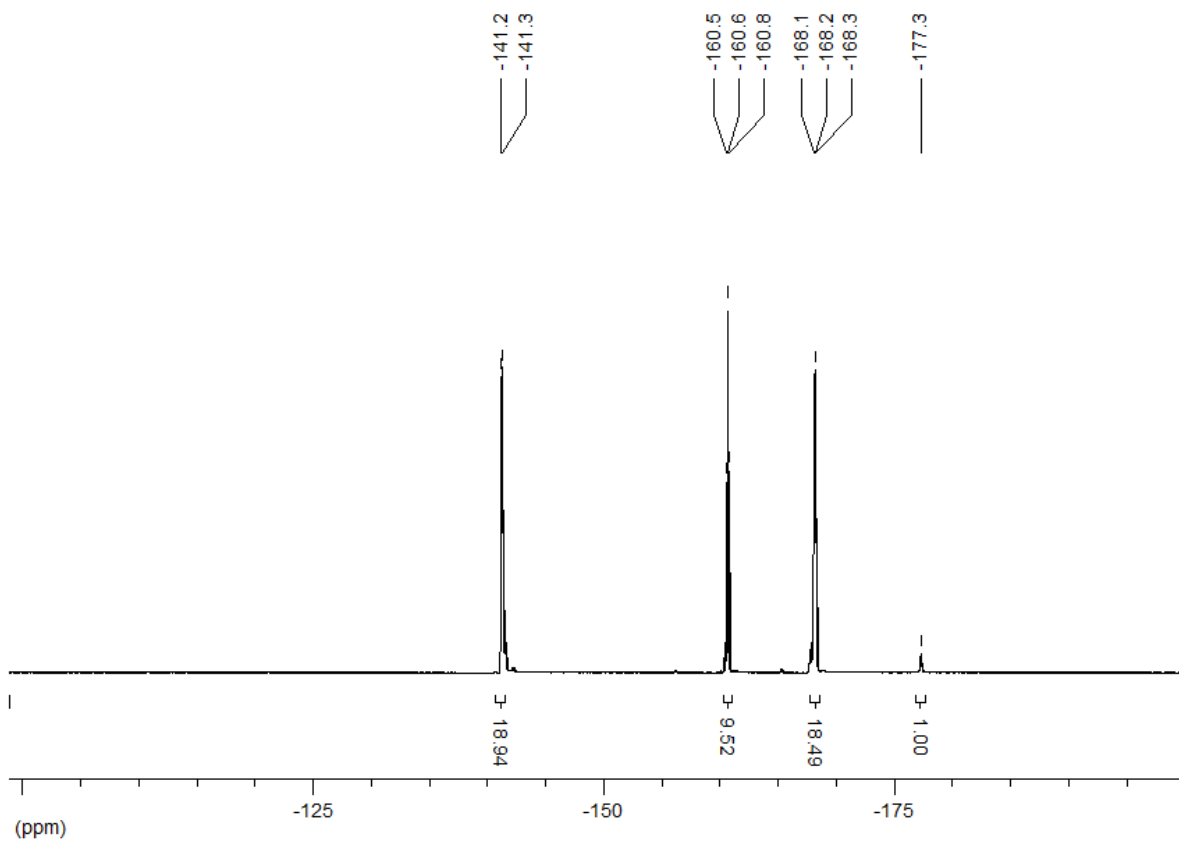

**Figure S23.**  $^{19}\text{F}$  NMR spectrum of  $[\text{Li}(\text{THF})_2][\text{Al}(\text{OAr}^{\text{F}_3})_3]$  (188 MHz,  $[\text{D}_3]\text{MeCN}$ , 20 °C).

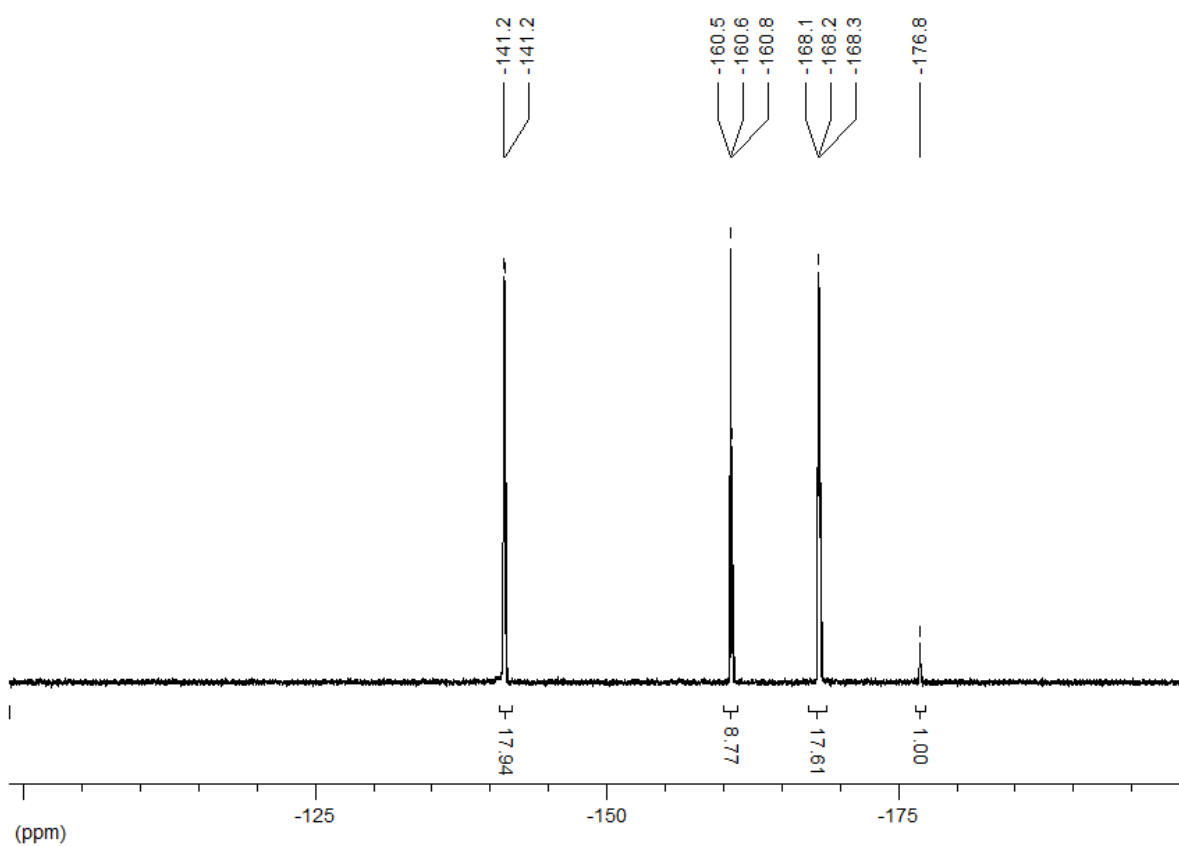

**Figure S24.**  $^{19}\text{F}$  NMR spectrum of  $[\text{FeCp}_2][\text{Al}(\text{OAr}^{\text{F}_3})_3]$  (188 MHz,  $[\text{D}_3]\text{MeCN}$ , 20 °C).

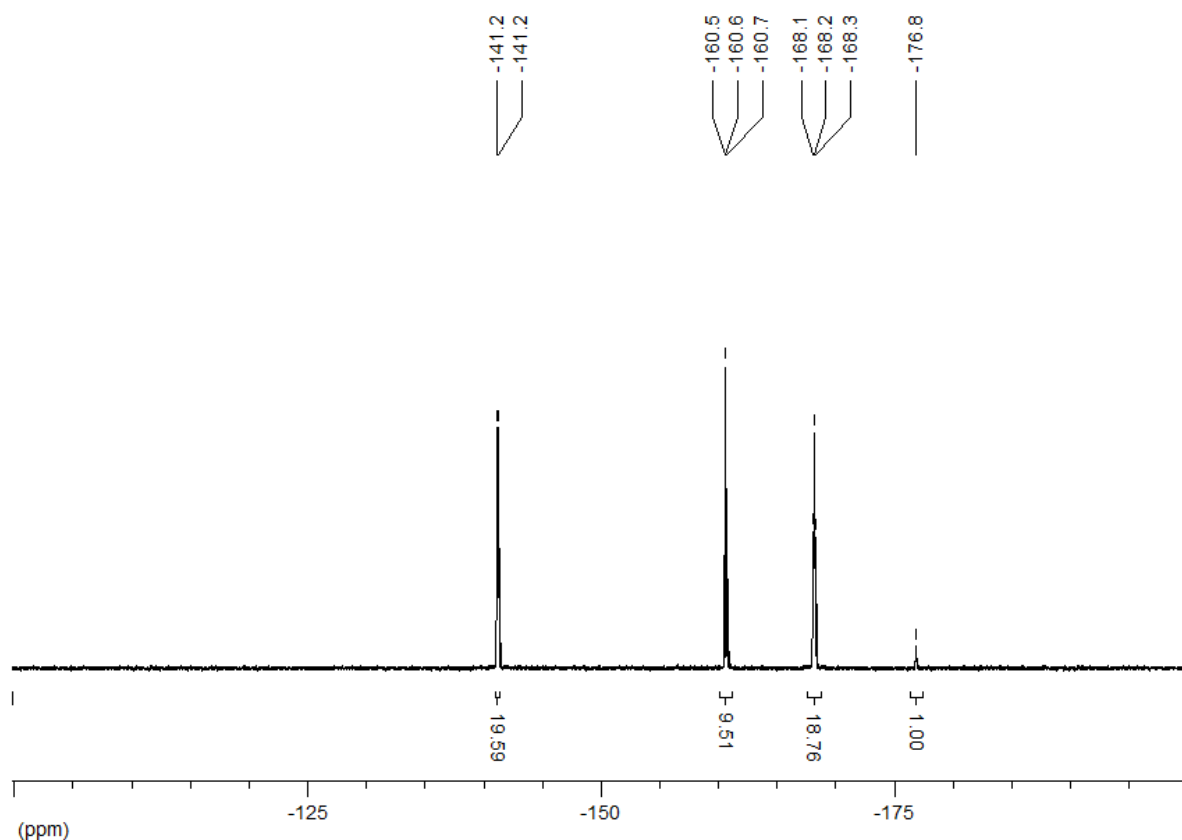

**Figure S25.**  $^{19}\text{F}$  NMR spectrum of  $[\text{NBu}_4][\text{FAl}(\text{OCAr}^{\text{F}_3})_3]$  (188 MHz,  $[\text{D}_3]\text{MeCN}$ , 20 °C).

### Computational Details

The geometries of the compounds have been fully optimized with gradient-corrected density functional theory (DFT) in the form of Becke's three-parameter hybrid B3LYP<sup>[8]</sup> functional with 6-311++G(2d,2p) all electron basis set<sup>[9]</sup> using the Gaussian 09 program package.<sup>[10]</sup> Basis set superposition error (BSSE) was evaluated using the counterpoise method<sup>[11]</sup> and amounts 12-17 kJ mol<sup>-1</sup> for the FIA. Since the counterpoise method overestimates BSSE, the computed FIA lies in between BSSE corrected and BSSE uncorrected values.<sup>[12]</sup> All stationary points of the potential energy surface (PES) were characterized by analytic evaluation of second derivatives, with the exception of highly demanding  $\text{Al}(\text{OCAr}^{\text{F}_3})_3$  and its anion. In all other cases optimized structures correspond to minima on their respective potential energy surfaces.

**Table S2.** Fluoride ion affinities (FIA) for the studied Lewis acids,  $\text{kJ}\cdot\text{mol}^{-1}$ . BSSE-corrected values in *italics*.

| Compound                                                                          | FIA                   | Level of theory                                | Reference    |
|-----------------------------------------------------------------------------------|-----------------------|------------------------------------------------|--------------|
| <b>AlCl<sub>3</sub></b>                                                           | 484, 472              | B3LYP/6-311++G(2d,2p)                          | present work |
|                                                                                   | 503                   | MP2/6-311++G(2d,2p)//<br>B3LYP/6-311++G(2d,2p) | present work |
|                                                                                   | 498                   | BP86/SV(P)                                     | [13]         |
|                                                                                   | 457                   | BP86/SV(P)                                     | [14]         |
|                                                                                   | 502                   | CCSD(T)(FC) <sup>a</sup>                       | [13]         |
|                                                                                   | 479                   | MP2/PDZ                                        | [15]         |
| <b>SbF<sub>5</sub></b>                                                            | 478, 466              | B3LYP/6-311++G(2d,2p)                          | present work |
|                                                                                   | 501                   | MP2/6-311++G(2d,2p)//<br>B3LYP/6-311++G(2d,2p) | present work |
|                                                                                   | 495                   | CCSD(T)FC <sup>a</sup>                         | [13]         |
|                                                                                   | 493                   | BP86/SV(P)                                     | [13]         |
|                                                                                   | 489                   | RI-BP86/SV(P)                                  | [16]         |
|                                                                                   | 503                   | MP2/PDZ                                        | [15]         |
| <b>B(C<sub>6</sub>F<sub>5</sub>)<sub>3</sub></b>                                  | 413, 398              | B3LYP/6-311++G(2d,2p)                          | present work |
|                                                                                   | 451                   | MP2/6-311++G(2d,2p)//<br>B3LYP/6-311++G(2d,2p) | present work |
|                                                                                   | 444                   | BP86/SV(P)                                     | [14,16]      |
|                                                                                   | 452                   | BP86/SV(P)                                     | [13]         |
| <b>C<sub>6</sub>H<sub>5</sub>F·Al(OC(CF<sub>3</sub>)<sub>3</sub>)<sub>3</sub></b> | 495, 492 <sup>b</sup> | B3LYP/6-311++G(2d,2p)                          | present work |
|                                                                                   | 505                   | BP86/SV(P)                                     | [14]         |
|                                                                                   | 465                   | MP2/6-311++G(2d,2p)//<br>B3LYP/6-311++G(2d,2p) | present work |
|                                                                                   |                       |                                                |              |
| <b>Al(OCaF<sub>3</sub>)<sub>3</sub></b>                                           | 536, 520              | B3LYP/6-311++G(2d,2p)                          | present work |
|                                                                                   | 555                   | MP2/6-311++G(2d,2p)//<br>B3LYP/6-311++G(2d,2p) | present work |
|                                                                                   |                       |                                                |              |
| <b>Al(OC(CF<sub>3</sub>)<sub>3</sub>)<sub>3</sub></b>                             | 541, 525              | B3LYP/6-311++G(2d,2p)                          | present work |
|                                                                                   | 547                   | MP2/6-311++G(2d,2p)//<br>B3LYP/6-311++G(2d,2p) | present work |
|                                                                                   | 543                   | BP86/SV(P)                                     | [13]         |
|                                                                                   | 537                   | BP86/SV(P)                                     | [14,16]      |
|                                                                                   |                       |                                                |              |
| <b>Al(N(C<sub>6</sub>F<sub>5</sub>)<sub>2</sub>)<sub>3</sub></b>                  | 555                   | BP86-D3/def-TZVP                               | [17]         |

<sup>a</sup>  $\Delta E = \Delta E(\text{CCSD(T)/AVDZ}) - \Delta E(\text{MP2/AVDZ}) + \Delta E(\text{MP2/AVQZ})$ .

<sup>b</sup> Values for the process  $\text{C}_6\text{H}_5\text{F}\cdot\text{Al}(\text{OC}(\text{CF}_3)_3)_3 + \text{F}^- = [\text{FAl}(\text{OC}(\text{CF}_3)_3)_3]^- + \text{C}_6\text{H}_5\text{F}$

**Table S3.** FIA, kJ mol<sup>-1</sup>, of selected Lewis acids, computed at different computational levels and using different computational schemes.

| Compound                                                                             | Exp.<br>(high level) | BP86/SVP<br>[143] | B3LYP/6-311++G(2d,2p) |                  |           | B3LYP-D3/6-<br>311++G(2d,2p)//<br>B3LYP/6-<br>311++G(2d,2p) |           | M06/6-311++G(2d,2p)//<br>B3LYP/6-311++G(2d,2p) |           | MP2/6-<br>311++G(2d,2p)//<br>B3LYP/6-<br>311++G(2d,2p) |           |
|--------------------------------------------------------------------------------------|----------------------|-------------------|-----------------------|------------------|-----------|-------------------------------------------------------------|-----------|------------------------------------------------|-----------|--------------------------------------------------------|-----------|
|                                                                                      |                      |                   | direct                | direct<br>(BSSE) | isodesmic | direct                                                      | isodesmic | direct                                         | isodesmic | direct                                                 | isodesmic |
| COF <sub>2</sub>                                                                     | 209                  | -                 | 205                   | 194              | -         | 207                                                         | -         | 211                                            | -         | 205                                                    |           |
| BF <sub>3</sub>                                                                      | 346 [14]             | 342               | 330                   | 319              | 334       | 333                                                         | 335       | 337                                            | 336       | 343                                                    | 347       |
| SbF <sub>5</sub>                                                                     | 495 [14]             | 493               | 478                   | 466              | 482       | 482                                                         | 484       | 505                                            | 503       | 501                                                    | 505       |
| AlCl <sub>3</sub>                                                                    | 502 [14]             | 498               | 484                   | 472              | 488       | 488                                                         | 490       | 502                                            | 500       | 503                                                    | 507       |
| B(C <sub>6</sub> F <sub>5</sub> ) <sub>3</sub>                                       | -                    | 452               | 413                   | 398              | 417       | 422                                                         | 424       | 431                                            | 429       | 451                                                    | 454       |
| Al{OC(CF <sub>3</sub> ) <sub>3</sub> } <sub>3</sub>                                  | -                    | 543               | 541                   | 525              | 545       | 547                                                         | 549       | 552                                            | 551       | 547                                                    | 551       |
| Al{OC(CF <sub>3</sub> ) <sub>3</sub> } <sub>3</sub> ·C <sub>6</sub> H <sub>5</sub> F | -                    | -                 | 495                   | 492              | 499       | 470                                                         | 472       | 487                                            | 486       | 465                                                    | 468       |
| Al{OC(C <sub>6</sub> F <sub>5</sub> ) <sub>3</sub> } <sub>3</sub>                    | -                    | -                 | 536                   | 519              | 540       | 545                                                         | 547       | 549                                            | 547       | 555                                                    | 559       |

direct: Computed from the reaction LA + F<sup>-</sup> =LAF<sup>-</sup>.

direct. (BSSE): the same corrected to the basis set superposition energy (BSSE) error.

isodesmic: Computed from the reaction LA + COF<sub>3</sub><sup>-</sup> =LAF<sup>-</sup> + COF<sub>2</sub> coupled with the experimental value of FIA of COF<sub>2</sub> (209 kJ mol<sup>-1</sup>).

## Computation of FIA

In addition to the FIA computed using the reaction via direct F<sup>-</sup> addition to LA, these values were also computed using the isodesmic reaction LA + COF<sub>3</sub><sup>-</sup> → LAF<sup>-</sup> + COF<sub>2</sub> and experimental gas phase FIA value of COF<sub>2</sub> (209 kJ mol<sup>-1</sup>). This approach has been used by Christie et al.<sup>[16]</sup>, and more recently by Stephan and coworkers.<sup>[18]</sup> Values are given in Table S1. At the each employed level of theory, the differences between FIA values obtained from F<sup>-</sup> addition and the isodesmic reaction approach is less than 4 kJ mol<sup>-1</sup>, indicating that the chosen basis set is large enough to compute the absolute electron affinities. However, the values of FIA at B3LYP/6-311++G(2d,2p) method for reference compounds, such as BF<sub>3</sub>, SbF<sub>5</sub>, and AlCl<sub>3</sub> are underestimated by 15 kJ mol<sup>-1</sup>. BSSE corrected values are by circa 12 kJ mol<sup>-1</sup> lower. The inclusion of dispersion correction via single point energy computation at B3LYP/6-311++G(2d,2p) optimized geometries using D3 Grimme approach increases the FIA values by 5-7 kJ mol<sup>-1</sup>, and using M06 Truhlar functional by 11-20 kJ mol<sup>-1</sup>. However, in both cases the FIA of B(C<sub>6</sub>F<sub>5</sub>)<sub>3</sub> is underestimated compared to values obtained using isodesmic reactions at BP86/SVP level,<sup>[143]</sup> calibrated against the high level *ab initio* methods.<sup>[143]</sup> The most consistent set of FIA data was obtained using *ab initio* MP2/6-311++G(2d,2p) single point energies at B3LYP/6-311++G(2d,2p) optimized geometries.

**Table S4.** Total energies  $E^{\circ}_0$ , BSSE corrected energies  $E^{\circ}_{0(\text{BSSE})}$ , sum of electronic and thermal enthalpies  $H^{\circ}_{298}$  (Hartree) and standard entropies  $S^{\circ}_{298}$  ( $\text{cal mol}^{-1}\text{K}^{-1}$ ). B3LYP/6-311++(2d,2p) level of theory.

| Compound                                                                   | $E^{\circ}_0$ | $E^{\circ}_{0(\text{BSSE})}$ | $H^{\circ}_{298}$ | $S^{\circ}_{298}$ |
|----------------------------------------------------------------------------|---------------|------------------------------|-------------------|-------------------|
| $\text{C}_6\text{H}_5\text{F}$                                             | -331.5917371  |                              | -331.493652       | 72.147            |
| $\text{F}^-$                                                               | -99.8886932   |                              | -99.886333        | 34.767            |
| $\text{COF}_2$                                                             | -313.1241625  |                              | -313.106046       | 61.914            |
| $\text{COF}_3^-$                                                           | -413.090954   | -413.0866821                 | -413.07081        | 66.337            |
| $\text{BF}_3$                                                              | -324.6790842  |                              | -324.662383       | 60.888            |
| $\text{BF}_4^-$                                                            | -424.693655   | -424.6894409                 | -424.67446        | 64.574            |
| $\text{SbF}_5$                                                             | -739.8084345  |                              | -739.78908        | 86.136            |
| $\text{SbF}_6^-$                                                           | -839.879183   | -839.8746121                 | -839.856753       | 83.493            |
| $\text{AlCl}_3$                                                            | -1623.352313  |                              | -1623.341275      | 74.989            |
| $\text{AlCl}_3\text{F}^-$                                                  | -1723.425462  | -1723.420596                 | -1723.411014      | 83.089            |
| $\text{B}(\text{C}_6\text{F}_5)_3$                                         | -2208.990018  |                              | -2208.806451      | 192.195           |
| $[\text{B}(\text{C}_6\text{F}_5)_3\text{F}]^-$                             | -2309.036136  | -2309.030437                 | -2308.85032       | 196.628           |
| $\text{Al}(\text{OC}(\text{CF}_3)_3)_3$                                    | -3622.461268  |                              | -3622.253432      | 251.024           |
| $[\text{FAl}(\text{OC}(\text{CF}_3)_3)_3]^-$                               | -3722.555944  | -3722.549985                 | -3722.3453        | 265.125           |
| $\text{Al}(\text{OC}(\text{CF}_3)_3)_3 \cdot \text{C}_6\text{H}_5\text{F}$ | -3954.070266  | -3954.065487                 | -3953.762323      | 295.193           |
| $\text{Al}(\text{OCAr}^{\text{F}_3})_3$                                    | -7134.928079  |                              |                   |                   |
| $[\text{FAl}(\text{OCAr}^{\text{F}_3})_3]^-$                               | -7135.643522  | -7135.640927                 |                   |                   |

**Table S5.** Reaction energies  $\Delta E^{\circ}_0$ , standard enthalpies  $\Delta H^{\circ}_{298}$ , Gibbs energies  $\Delta G^{\circ}_{298}$  ( $\text{kJ mol}^{-1}$ ) and standard entropies  $\Delta S^{\circ}_{298}$  ( $\text{J mol}^{-1}\text{K}^{-1}$ ) for the considered gas phase processes. B3LYP/6-311++(2d,2p) level of theory.

| Process                                                                                                                                                             | $\Delta E^{\circ}_0$ | $\Delta E^{\circ}_{0(\text{BSSE})}$ | $\Delta H^{\circ}_{298}$ | $\Delta S^{\circ}_{298}$ | $\Delta G^{\circ}_{298}$ |
|---------------------------------------------------------------------------------------------------------------------------------------------------------------------|----------------------|-------------------------------------|--------------------------|--------------------------|--------------------------|
| $\text{COF}_2 + \text{F}^- = \text{COF}_3^-$                                                                                                                        | -205.0               | -193.8                              | -205.9                   | -127.0                   | -168.1                   |
| $\text{SbF}_5 + \text{F}^- = \text{SbF}_6^-$                                                                                                                        | -478.0               | -466.0                              | -476.1                   | -156.5                   | -429.4                   |
| $\text{AlCl}_3 + \text{F}^- = \text{AlCl}_3\text{F}^-$                                                                                                              | -484.3               | -471.5                              | -481.5                   | -111.6                   | -448.3                   |
| $\text{B}(\text{C}_6\text{F}_5)_3 + \text{F}^- = [\text{B}(\text{C}_6\text{F}_5)_3\text{F}]^-$                                                                      | -413.3               | -398.4                              | -413.6                   | -126.9                   | -375.8                   |
| $\text{Al}(\text{OC}(\text{CF}_3)_3)_3 + \text{F}^- = [\text{FAl}(\text{OC}(\text{CF}_3)_3)_3]^-$                                                                   | -540.8               | -525.2                              | -539.6                   | -86.5                    | -513.9                   |
| $\text{Al}(\text{OC}(\text{CF}_3)_3)_3 \cdot \text{C}_6\text{H}_5\text{F} + \text{F}^- = [\text{FAl}(\text{OC}(\text{CF}_3)_3)_3]^- + \text{C}_6\text{H}_5\text{F}$ | -495.5               | -492.4                              | -499.6                   | 30.6                     | -508.7                   |
| $\text{Al}(\text{OCAr}^{\text{F}_3})_3 + \text{F}^- = [\text{FAl}(\text{OCAr}^{\text{F}_3})_3]^-$                                                                   | -536.3               | -519.5                              |                          |                          |                          |

**Table S6.** Total energies  $E^0$  (Hartree) at different levels of theory computed at B3LYP/6-311++(2d,2p) optimized geometries.

| Compound\Level of theory                                                          | MP2/6-311++(2d,2p) | B3LYP-D3/6-311++(2d,2p) | M06/6-311++(2d,2p) |
|-----------------------------------------------------------------------------------|--------------------|-------------------------|--------------------|
| <b>C<sub>6</sub>H<sub>5</sub>F</b>                                                | -330.7390689       | -331.5974632            | -331.3643923       |
| <b>F<sup>-</sup></b>                                                              | -99.703831         | -99.88869321            | -99.8506077        |
| <b>COF<sub>2</sub></b>                                                            | -312.5122944       | -313.1247139            | -313.0023095       |
| <b>COF<sub>3</sub><sup>-</sup></b>                                                | -412.2943458       | -413.0922309            | -412.9331019       |
| <b>BF<sub>3</sub></b>                                                             | -324.0654386       | -324.6797683            | -324.566859        |
| <b>BF<sub>4</sub><sup>-</sup></b>                                                 | -423.8999748       | -424.695125             | -424.5460104       |
| <b>SbF<sub>5</sub></b>                                                            | -738.1934101       | -739.8111628            | -739.6389605       |
| <b>SbF<sub>6</sub><sup>-</sup></b>                                                | -838.0882096       | -839.8835084            | -839.6818793       |
| <b>AlCl<sub>3</sub></b>                                                           | -1621.203425       | -1623.355184            | -1623.218258       |
| <b>AlCl<sub>3</sub>F<sup>-</sup></b>                                              | -1721.098976       | -1723.429893            | -1723.260036       |
| <b>B(C<sub>6</sub>F<sub>5</sub>)<sub>3</sub></b>                                  | -2204.363648       | -2209.029893            | -2208.002474       |
| <b>[B(C<sub>6</sub>F<sub>5</sub>)<sub>3</sub>F]<sup>-</sup></b>                   | -2304.239165       | -2309.07918             | -2308.01706        |
| <b>Al(OC(CF<sub>3</sub>)<sub>3</sub>)<sub>3</sub></b>                             | -3615.582687       | -3622.527738            | -3621.225153       |
| <b>[FAl(OC(CF<sub>3</sub>)<sub>3</sub>)<sub>3</sub>]<sup>-</sup></b>              | -3715.494955       | -3722.624824            | -3721.286044       |
| <b>Al(OC(CF<sub>3</sub>)<sub>3</sub>)<sub>3</sub>·C<sub>6</sub>H<sub>5</sub>F</b> | -3946.353157       | -3954.154501            | -3952.614313       |
| <b>Al(OCAr<sup>F</sup>)<sub>3</sub></b>                                           | -7120.231972       | -7135.124771            | -7131.879806       |
| <b>[FAl(OCAr<sup>F</sup>)<sub>3</sub>]<sup>-</sup></b>                            | -7220.147278       | -7235.221196            | -7231.939365       |

## Electrostatic Potentials

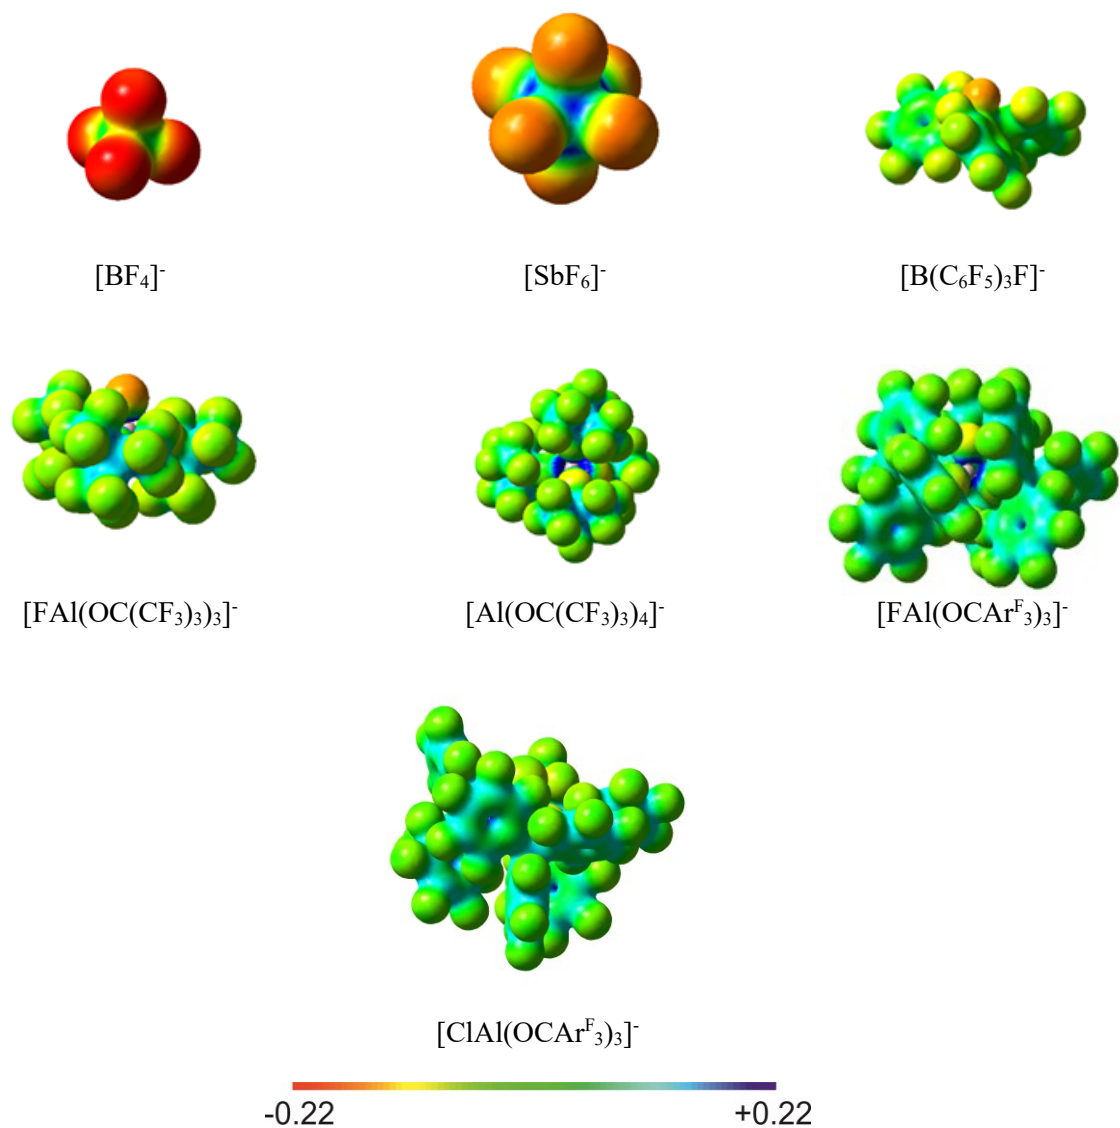

**Figure S26.** Projection of the calculated electrostatic potential onto a  $0.025 \text{ e}^- \text{ Bohr}^{-3}$  isodensity surface for studied WCA. B3LYP/6-311++G(2d,2p) level of theory. For  $[\text{ClAl}(\text{OCAr}^{\text{F}_3})_3]^-$  electrostatic potential was computed using experimental geometry in compound  $[\text{CPh}_3]^+[\text{ClAl}(\text{OCAr}^{\text{F}_3})_3]^-$ .



## Global Electrophilicity Index

The base-independent Lewis acidity criterion, global electrophilicity index GEI,<sup>[19,20]</sup> denoted as  $\omega$ , was recently used as a simple quantitative assessment of Lewis acidity of 20 fluorophenylboranes by Stephan.<sup>[18]</sup>

$$\omega = \frac{\chi^2}{2\eta}, \text{ where } \eta = E_{\text{LUMO}} - E_{\text{HOMO}}, \chi = \frac{1}{2}(E_{\text{LUMO}} + E_{\text{HOMO}}).^{[18]}$$

We have also explored a performance GEI for studied Lewis acids (Table S7). Our results indicate that GEI cannot be used for judging the Lewis acidity towards F<sup>-</sup> for Lewis acids of different types (Figure S2). The R<sup>2</sup> value for the linear correlation is close to zero, indicating the absence of the correlation.

**Table S7.** Energies of HOMO  $E_{\text{HOMO}}$ , LUMO  $E_{\text{LUMO}}$ , the Mulliken electronegativity  $\chi$ , chemical hardness  $\eta$  and Global Electrophilicity Index  $\omega$ , in eV, and FIA in kJ mol<sup>-1</sup> for studied Lewis acids.

| Lewis acid                                                        | $E_{\text{HOMO}}$ | $E_{\text{LUMO}}$ | $\chi$ | $\eta$ | $\omega$ | FIA |
|-------------------------------------------------------------------|-------------------|-------------------|--------|--------|----------|-----|
| COF <sub>2</sub>                                                  | -15.302           | 1.790             | 6.756  | 17.092 | 1.335    | 205 |
| SbF <sub>5</sub>                                                  | -17.863           | -0.362            | 9.113  | 17.502 | 2.372    | 501 |
| AlCl <sub>3</sub>                                                 | -12.681           | 0.762             | 5.959  | 13.443 | 1.321    | 503 |
| B(C <sub>6</sub> F <sub>5</sub> ) <sub>3</sub>                    | -10.526           | -0.236            | 5.381  | 10.290 | 1.407    | 451 |
| BF <sub>3</sub>                                                   | -18.096           | 1.446             | 8.325  | 19.541 | 1.773    | 343 |
| Al{OC(CF <sub>3</sub> ) <sub>3</sub> } <sub>3</sub>               | -14.112           | 1.586             | 6.263  | 15.698 | 1.249    | 547 |
| Al{OC(C <sub>6</sub> F <sub>5</sub> ) <sub>3</sub> } <sub>3</sub> | -10.416           | 0.912             | 4.752  | 11.328 | 0.997    | 555 |

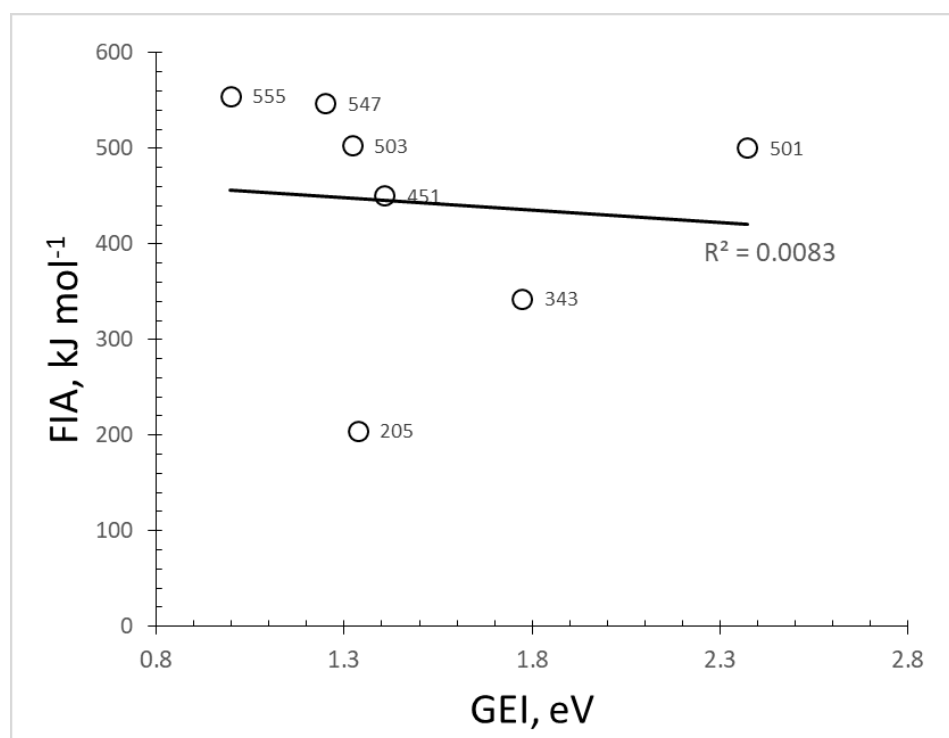

**Figure S27.** The GEI-FIA relationship for the studied Lewis acids.

**Table S8.** Optimized geometries of theoretically studied compounds. xyz coordinates in angstroms. B3LYP/6-311++(2d,2p) level of theory.

| <b>COF<sub>2</sub></b>               |              |              |              |
|--------------------------------------|--------------|--------------|--------------|
| 8                                    | 0.000000000  | 0.000000000  | 1.316226000  |
| 6                                    | 0.000000000  | 0.000000000  | 0.145728000  |
| 9                                    | 0.000000000  | -1.066025000 | -0.633565000 |
| 9                                    | 0.000000000  | 1.066025000  | -0.633565000 |
| <b>COF<sub>3</sub><sup>-</sup></b>   |              |              |              |
| 8                                    | 0.000000000  | 0.000000000  | 1.410573000  |
| 9                                    | 0.000000000  | 1.279482000  | -0.461961000 |
| 9                                    | 1.108064000  | -0.639741000 | -0.461961000 |
| 6                                    | 0.000000000  | 0.000000000  | 0.198058000  |
| 9                                    | -1.108064000 | -0.639741000 | -0.461961000 |
| <b>BF<sub>3</sub></b>                |              |              |              |
| 5                                    | 0.000000000  | 0.000000000  | 0.000000000  |
| 9                                    | 0.000000000  | 1.313903000  | 0.000000000  |
| 9                                    | 1.137874000  | -0.656952000 | 0.000000000  |
| 9                                    | -1.137874000 | -0.656952000 | 0.000000000  |
| <b>BF<sub>4</sub><sup>-</sup></b>    |              |              |              |
| 9                                    | 0.814433000  | 0.814433000  | 0.814433000  |
| 5                                    | 0.000000000  | 0.000000000  | 0.000000000  |
| 9                                    | -0.814433000 | -0.814433000 | 0.814433000  |
| 9                                    | -0.814433000 | 0.814433000  | -0.814433000 |
| 9                                    | 0.814433000  | -0.814433000 | -0.814433000 |
| <b>AlCl<sub>3</sub></b>              |              |              |              |
| 13                                   | 0.000000000  | 0.000000000  | 0.000000000  |
| 17                                   | 0.000000000  | 2.081028000  | 0.000000000  |
| 17                                   | 1.802223000  | -1.040514000 | 0.000000000  |
| 17                                   | -1.802223000 | -1.040514000 | 0.000000000  |
| <b>AlCl<sub>3</sub>F<sup>-</sup></b> |              |              |              |
| 13                                   | 0.000000000  | 0.000000000  | 0.294330000  |
| 9                                    | 0.000000000  | 0.000000000  | 1.980513000  |
| 17                                   | 0.000000000  | 2.052352000  | -0.424527000 |
| 17                                   | 1.777389000  | -1.026176000 | -0.424527000 |
| 17                                   | -1.777389000 | -1.026176000 | -0.424527000 |
| <b>C<sub>6</sub>H<sub>5</sub>F</b>   |              |              |              |
| 6                                    | 0.000000000  | 0.000000000  | 0.924363000  |
| 6                                    | 0.000000000  | 1.213504000  | 0.259260000  |
| 6                                    | 0.000000000  | -1.213504000 | 0.259260000  |
| 6                                    | 0.000000000  | 1.204520000  | -1.132386000 |
| 6                                    | 0.000000000  | -1.204520000 | -1.132386000 |
| 6                                    | 0.000000000  | 0.000000000  | -1.829860000 |
| 1                                    | 0.000000000  | 2.134294000  | 0.823970000  |
| 1                                    | 0.000000000  | -2.134294000 | 0.823970000  |
| 1                                    | 0.000000000  | 2.142698000  | -1.669715000 |
| 1                                    | 0.000000000  | -2.142698000 | -1.669715000 |
| 1                                    | 0.000000000  | 0.000000000  | -2.910601000 |
| 9                                    | 0.000000000  | 0.000000000  | 2.279176000  |
| <b>SbF<sub>5</sub></b>               |              |              |              |
| 9                                    | 0.000000000  | -0.003437000 | 1.866622000  |
| 51                                   | 0.000000000  | -0.000072000 | -0.000793000 |
| 9                                    | 0.000000000  | 1.622621000  | -0.925264000 |
| 9                                    | 0.000000000  | -1.619813000 | -0.930830000 |
| 9                                    | 1.876331000  | 0.000517000  | -0.003017000 |
| 9                                    | -1.876332000 | 0.000517000  | -0.003017000 |
| <b>SbF<sub>6</sub><sup>-</sup></b>   |              |              |              |
| 9                                    | 0.000000000  | 0.000000000  | 1.912776000  |
| 9                                    | 0.000000000  | 1.912776000  | 0.000000000  |

|    |              |              |              |
|----|--------------|--------------|--------------|
| 9  | 0.000000000  | -1.912776000 | 0.000000000  |
| 9  | 1.912776000  | 0.000000000  | 0.000000000  |
| 9  | -1.912776000 | 0.000000000  | 0.000000000  |
| 51 | 0.000000000  | 0.000000000  | 0.000000000  |
| 9  | 0.000000000  | 0.000000000  | -1.912776000 |

**B(C<sub>6</sub>F<sub>5</sub>)<sub>3</sub>**

|   |              |              |              |
|---|--------------|--------------|--------------|
| 6 | -0.000878000 | 1.563932000  | 0.006594000  |
| 6 | 1.356171000  | -0.784249000 | 0.003353000  |
| 6 | -1.358736000 | -0.785425000 | -0.005712000 |
| 6 | 0.004436000  | 4.389609000  | 0.011834000  |
| 6 | 0.886354000  | 2.306168000  | 0.790909000  |
| 6 | -0.885548000 | 2.312322000  | -0.774663000 |
| 6 | -0.889030000 | 3.696788000  | -0.794206000 |
| 6 | 0.895137000  | 3.690518000  | 0.815504000  |
| 9 | 1.760597000  | 1.680070000  | 1.593600000  |
| 9 | -1.762169000 | 1.692472000  | -1.579645000 |
| 9 | -1.737196000 | 4.368741000  | -1.573787000 |
| 9 | 1.746079000  | 4.356457000  | 1.597271000  |
| 9 | 0.006958000  | 5.717752000  | 0.014144000  |
| 6 | -3.808276000 | -2.195087000 | -0.021482000 |
| 6 | -2.458700000 | -0.378010000 | 0.754870000  |
| 6 | -1.551710000 | -1.937144000 | -0.774285000 |
| 6 | -2.748237000 | -2.633152000 | -0.804010000 |
| 6 | -3.661884000 | -1.062957000 | 0.768895000  |
| 9 | -2.368609000 | 0.702595000  | 1.544929000  |
| 9 | -0.564104000 | -2.397991000 | -1.556831000 |
| 9 | -2.892956000 | -3.714527000 | -1.570952000 |
| 9 | -4.676892000 | -0.649085000 | 1.528510000  |
| 9 | -4.959433000 | -2.857227000 | -0.028827000 |
| 6 | 3.807350000  | -2.190875000 | 0.006194000  |
| 6 | 1.553328000  | -1.937417000 | 0.768355000  |
| 6 | 2.452690000  | -0.373471000 | -0.760247000 |
| 6 | 3.656731000  | -1.056834000 | -0.780623000 |
| 6 | 2.750741000  | -2.632149000 | 0.791587000  |
| 9 | 0.569247000  | -2.400849000 | 1.553844000  |
| 9 | 2.357890000  | 0.709220000  | -1.547092000 |
| 9 | 4.668366000  | -0.639529000 | -1.542869000 |
| 9 | 2.899750000  | -3.715263000 | 1.555277000  |
| 9 | 4.959228000  | -2.851859000 | 0.007657000  |
| 5 | -0.001747000 | -0.002970000 | 0.001905000  |

**[B(C<sub>6</sub>F<sub>5</sub>)<sub>3</sub>F]<sup>-</sup>**

|   |              |              |              |
|---|--------------|--------------|--------------|
| 6 | 0.000000000  | 1.592458000  | 0.291493000  |
| 6 | 1.379109000  | -0.796229000 | 0.291493000  |
| 6 | -1.379109000 | -0.796229000 | 0.291493000  |
| 6 | 0.021093000  | 4.371968000  | -0.313184000 |
| 6 | 0.822942000  | 2.502809000  | 0.951931000  |
| 6 | -0.789657000 | 2.152756000  | -0.704194000 |
| 6 | -0.799779000 | 3.506950000  | -1.013384000 |
| 6 | 0.844408000  | 3.862397000  | 0.676519000  |
| 9 | 1.687864000  | 2.085355000  | 1.895905000  |
| 9 | -1.603360000 | 1.383682000  | -1.462499000 |
| 9 | -1.595616000 | 3.988429000  | -1.986567000 |
| 9 | 1.661923000  | 4.693395000  | 1.349624000  |
| 9 | 0.026118000  | 5.686056000  | -0.594372000 |
| 6 | -3.796782000 | -2.167717000 | -0.313184000 |
| 6 | -2.578967000 | -0.538716000 | 0.951931000  |
| 6 | -1.469513000 | -1.760241000 | -0.704194000 |
| 6 | -2.637218000 | -2.446104000 | -1.013384000 |
| 6 | -3.767138000 | -1.199920000 | 0.676519000  |
| 9 | -2.649902000 | 0.419056000  | 1.895905000  |
| 9 | -0.396623000 | -2.080391000 | -1.462499000 |

|   |              |              |              |
|---|--------------|--------------|--------------|
| 9 | -2.656273000 | -3.376058000 | -1.986567000 |
| 9 | -4.895561000 | -0.907430000 | 1.349624000  |
| 9 | -4.937328000 | -2.820409000 | -0.594372000 |
| 6 | 3.775689000  | -2.204251000 | -0.313184000 |
| 6 | 1.756025000  | -1.964093000 | 0.951931000  |
| 6 | 2.259170000  | -0.392515000 | -0.704194000 |
| 6 | 3.436997000  | -1.060846000 | -1.013384000 |
| 6 | 2.922730000  | -2.662477000 | 0.676519000  |
| 9 | 0.962038000  | -2.504411000 | 1.895905000  |
| 9 | 1.999984000  | 0.696710000  | -1.462499000 |
| 9 | 4.251888000  | -0.612370000 | -1.986567000 |
| 9 | 3.233638000  | -3.785965000 | 1.349624000  |
| 9 | 4.911210000  | -2.865647000 | -0.594372000 |
| 5 | 0.000000000  | 0.000000000  | 0.768230000  |
| 9 | 0.000000000  | 0.000000000  | 2.188569000  |

**Al(OC(CF<sub>3</sub>))<sub>3</sub>)<sub>3</sub>**

|    |              |              |              |
|----|--------------|--------------|--------------|
| 13 | 0.129918000  | -0.015124000 | -0.138108000 |
| 9  | 4.062961000  | -0.345317000 | -0.438424000 |
| 9  | 3.976004000  | -2.078372000 | -1.724421000 |
| 9  | 4.521765000  | -2.309108000 | 0.364769000  |
| 9  | 1.605284000  | -3.363249000 | -1.835564000 |
| 9  | 2.572390000  | -4.218187000 | -0.094329000 |
| 9  | 0.529072000  | -3.489556000 | 0.035297000  |
| 9  | 2.823493000  | -0.682646000 | 1.928831000  |
| 9  | 2.107071000  | -2.699464000 | 2.168560000  |
| 9  | 0.717285000  | -1.112472000 | 1.590682000  |
| 9  | -2.307126000 | -3.065117000 | -0.923189000 |
| 9  | -2.264887000 | -2.843554000 | 1.225796000  |
| 9  | -4.159304000 | -2.793517000 | 0.165386000  |
| 9  | -1.981233000 | -0.285456000 | 2.135567000  |
| 9  | -4.101034000 | -0.691417000 | 1.913147000  |
| 9  | -3.252776000 | 1.140115000  | 1.127654000  |
| 9  | -4.939974000 | -0.289210000 | -0.749677000 |
| 9  | -3.302949000 | 0.878240000  | -1.562558000 |
| 9  | -3.627712000 | -1.141122000 | -2.252685000 |
| 9  | -1.101296000 | 3.519982000  | 1.481204000  |
| 9  | -1.646102000 | 3.067333000  | -0.561670000 |
| 9  | -0.487882000 | 4.851404000  | -0.114528000 |
| 9  | 0.217286000  | 1.323494000  | -1.846991000 |
| 9  | 0.478615000  | 3.447910000  | -2.283191000 |
| 9  | 2.183406000  | 2.245587000  | -1.745805000 |
| 9  | 2.249854000  | 4.476344000  | -0.032435000 |
| 9  | 2.872990000  | 2.584726000  | 0.831075000  |
| 9  | 1.534386000  | 3.876968000  | 1.928003000  |
| 8  | 1.476781000  | -0.896945000 | -0.791184000 |
| 8  | -1.424349000 | -0.615947000 | -0.438305000 |
| 8  | 0.441197000  | 1.496972000  | 0.651986000  |
| 6  | 2.220775000  | -1.824968000 | -0.120025000 |
| 6  | 3.732110000  | -1.636437000 | -0.488894000 |
| 6  | 1.734398000  | -3.263826000 | -0.516216000 |
| 6  | 2.032932000  | -1.614809000 | 1.428230000  |
| 6  | -2.705749000 | -0.874872000 | -0.057178000 |
| 6  | -2.873764000 | -2.429127000 | 0.101641000  |
| 6  | -3.035187000 | -0.167585000 | 1.306437000  |
| 6  | -3.672097000 | -0.346534000 | -1.176494000 |
| 6  | 0.624597000  | 2.710180000  | 0.048656000  |
| 6  | -0.676805000 | 3.569772000  | 0.222133000  |
| 6  | 0.911030000  | 2.494224000  | -1.484363000 |
| 6  | 1.848718000  | 3.431471000  | 0.709554000  |

| <b>[Al(OC(CF<sub>3</sub>)<sub>3</sub>)<sub>3</sub>F]<sup>-</sup></b>              |              |              |              |
|-----------------------------------------------------------------------------------|--------------|--------------|--------------|
| 13                                                                                | 0.019480000  | 0.008607000  | -0.950472000 |
| 9                                                                                 | 0.249413000  | 0.256764000  | -2.589599000 |
| 9                                                                                 | 0.346584000  | -4.143024000 | -0.890313000 |
| 9                                                                                 | -1.537891000 | -4.050059000 | -1.940419000 |
| 9                                                                                 | -1.429494000 | -4.984959000 | 0.015257000  |
| 9                                                                                 | -3.034073000 | -1.779704000 | -1.487670000 |
| 9                                                                                 | -3.575286000 | -3.308967000 | -0.050911000 |
| 9                                                                                 | -3.187141000 | -1.283760000 | 0.610223000  |
| 9                                                                                 | 0.252901000  | -3.234578000 | 1.664028000  |
| 9                                                                                 | -1.856122000 | -3.276516000 | 2.165638000  |
| 9                                                                                 | -0.819727000 | -1.383184000 | 1.958109000  |
| 9                                                                                 | -3.758976000 | 1.615259000  | -0.882288000 |
| 9                                                                                 | -3.590526000 | 1.706130000  | 1.269765000  |
| 9                                                                                 | -3.726010000 | 3.535786000  | 0.114531000  |
| 9                                                                                 | -1.051839000 | 1.752898000  | 2.259435000  |
| 9                                                                                 | -1.667207000 | 3.800559000  | 1.912575000  |
| 9                                                                                 | 0.269335000  | 3.112686000  | 1.224383000  |
| 9                                                                                 | -1.334609000 | 4.595069000  | -0.727817000 |
| 9                                                                                 | 0.060678000  | 3.115999000  | -1.472874000 |
| 9                                                                                 | -1.966135000 | 3.153840000  | -2.220263000 |
| 9                                                                                 | 2.474783000  | -0.141990000 | 2.374473000  |
| 9                                                                                 | 3.220149000  | 1.791539000  | 1.766933000  |
| 9                                                                                 | 4.536877000  | 0.068299000  | 1.749795000  |
| 9                                                                                 | 2.921195000  | 2.400975000  | -0.873655000 |
| 9                                                                                 | 4.824941000  | 1.395820000  | -0.637552000 |
| 9                                                                                 | 3.462487000  | 0.795686000  | -2.213267000 |
| 9                                                                                 | 4.588909000  | -1.363712000 | -0.613368000 |
| 9                                                                                 | 2.622472000  | -1.674873000 | -1.467713000 |
| 9                                                                                 | 2.978748000  | -2.143631000 | 0.611302000  |
| 8                                                                                 | -0.490165000 | -1.651642000 | -0.708238000 |
| 8                                                                                 | -1.244898000 | 1.038868000  | -0.298244000 |
| 8                                                                                 | 1.481489000  | 0.318113000  | -0.022663000 |
| 6                                                                                 | -1.257015000 | -2.553524000 | -0.081582000 |
| 6                                                                                 | -0.964965000 | -3.959645000 | -0.727770000 |
| 6                                                                                 | -2.791525000 | -2.228550000 | -0.253931000 |
| 6                                                                                 | -0.919774000 | -2.615201000 | 1.454660000  |
| 6                                                                                 | -1.633521000 | 2.289705000  | -0.001151000 |
| 6                                                                                 | -3.203598000 | 2.291730000  | 0.125208000  |
| 6                                                                                 | -1.012768000 | 2.749704000  | 1.373525000  |
| 6                                                                                 | -1.212086000 | 3.310875000  | -1.121073000 |
| 6                                                                                 | 2.817238000  | 0.182631000  | 0.025227000  |
| 6                                                                                 | 3.274518000  | 0.475721000  | 1.503322000  |
| 6                                                                                 | 3.521682000  | 1.211445000  | -0.939917000 |
| 6                                                                                 | 3.266052000  | -1.273189000 | -0.368077000 |
| <b>Al(OC(CF<sub>3</sub>)<sub>3</sub>)<sub>3</sub>·C<sub>6</sub>H<sub>5</sub>F</b> |              |              |              |
| 13                                                                                | 0.031531000  | 0.021550000  | 0.190890000  |
| 9                                                                                 | -0.147236000 | -0.215708000 | 2.089045000  |
| 9                                                                                 | 1.280121000  | 3.908072000  | 0.625800000  |
| 9                                                                                 | -0.770864000 | 4.396626000  | 1.089582000  |
| 9                                                                                 | 0.130053000  | 5.129206000  | -0.746020000 |
| 9                                                                                 | -2.641203000 | 2.645746000  | 0.196648000  |
| 9                                                                                 | -2.308565000 | 4.060544000  | -1.410925000 |
| 9                                                                                 | -2.308138000 | 1.929202000  | -1.814318000 |
| 9                                                                                 | 1.668708000  | 2.903603000  | -1.841785000 |
| 9                                                                                 | -0.122875000 | 3.359556000  | -2.969049000 |
| 9                                                                                 | 0.301472000  | 1.314749000  | -2.369565000 |
| 9                                                                                 | -3.936553000 | -0.858531000 | -0.625258000 |
| 9                                                                                 | -3.161360000 | -0.968818000 | -2.639164000 |
| 9                                                                                 | -3.997888000 | -2.737857000 | -1.700649000 |
| 9                                                                                 | -0.492528000 | -1.523006000 | -2.825591000 |

|   |              |              |              |
|---|--------------|--------------|--------------|
| 9 | -1.590967000 | -3.392423000 | -2.856694000 |
| 9 | 0.135526000  | -3.162651000 | -1.566703000 |
| 9 | -2.180125000 | -4.288230000 | -0.270989000 |
| 9 | -0.854210000 | -3.087134000 | 0.955676000  |
| 9 | -2.987086000 | -2.766309000 | 1.045786000  |
| 9 | 3.266800000  | -0.221984000 | -2.022789000 |
| 9 | 3.454615000  | -2.316100000 | -1.529319000 |
| 9 | 4.989302000  | -0.916955000 | -0.903834000 |
| 9 | 2.308243000  | -3.083193000 | 0.785603000  |
| 9 | 4.312193000  | -2.454093000 | 1.314577000  |
| 9 | 2.604050000  | -1.738639000 | 2.448662000  |
| 9 | 4.576793000  | 0.260976000  | 1.591766000  |
| 9 | 2.525351000  | 0.909617000  | 1.858529000  |
| 9 | 3.603376000  | 1.455813000  | 0.068254000  |
| 8 | -0.151267000 | 1.731739000  | 0.201831000  |
| 8 | -1.326966000 | -0.833613000 | -0.387617000 |
| 8 | 1.557422000  | -0.685081000 | -0.061455000 |
| 6 | -0.405167000 | 2.778160000  | -0.635143000 |
| 6 | 0.072925000  | 4.084960000  | 0.088047000  |
| 6 | -1.948263000 | 2.866218000  | -0.927064000 |
| 6 | 0.374782000  | 2.605826000  | -1.987021000 |
| 6 | -1.844071000 | -1.976819000 | -0.912089000 |
| 6 | -3.268616000 | -1.634064000 | -1.482414000 |
| 6 | -0.935196000 | -2.532202000 | -2.069488000 |
| 6 | -1.975662000 | -3.061443000 | 0.213944000  |
| 6 | 2.872565000  | -0.822250000 | 0.252957000  |
| 6 | 3.669286000  | -1.074389000 | -1.078022000 |
| 6 | 3.039990000  | -2.054263000 | 1.213986000  |
| 6 | 3.421582000  | 0.471870000  | 0.955244000  |
| 6 | -1.182623000 | 0.067761000  | 3.046879000  |
| 6 | -1.708796000 | -1.017180000 | 3.701497000  |
| 6 | -1.522522000 | 1.381769000  | 3.245602000  |
| 6 | -2.689153000 | -0.746290000 | 4.653314000  |
| 6 | -2.506720000 | 1.621162000  | 4.203267000  |
| 6 | -3.084707000 | 0.565100000  | 4.900992000  |
| 1 | -1.376137000 | -2.018707000 | 3.478698000  |
| 1 | -1.056485000 | 2.174284000  | 2.682769000  |
| 1 | -3.139165000 | -1.565091000 | 5.195599000  |
| 1 | -2.815510000 | 2.638173000  | 4.396531000  |
| 1 | -3.846960000 | 0.764549000  | 5.640346000  |

**[Al(OC(CF<sub>3</sub>)<sub>3</sub>)<sub>4</sub>]<sup>-</sup>**

|    |              |              |              |
|----|--------------|--------------|--------------|
| 8  | 1.390838000  | 0.471468000  | 0.946478000  |
| 13 | 0.000000000  | 0.000000000  | 0.000000000  |
| 8  | -1.390838000 | -0.471468000 | 0.946478000  |
| 8  | 0.471468000  | -1.390838000 | -0.946478000 |
| 8  | -0.471468000 | 1.390838000  | -0.946478000 |
| 6  | 2.423863000  | 0.166265000  | 1.750039000  |
| 6  | 0.166265000  | -2.423863000 | -1.750039000 |
| 6  | -2.423863000 | -0.166265000 | 1.750039000  |
| 6  | -0.166265000 | 2.423863000  | -1.750039000 |
| 6  | 2.418786000  | -1.347632000 | 2.184791000  |
| 6  | 2.337655000  | 1.066936000  | 3.039786000  |
| 6  | 3.774225000  | 0.472371000  | 1.001114000  |
| 6  | 0.472371000  | -3.774225000 | -1.001114000 |
| 6  | 1.066936000  | -2.337655000 | -3.039786000 |
| 6  | -1.347632000 | -2.418786000 | -2.184791000 |
| 6  | -2.337655000 | -1.066936000 | 3.039786000  |
| 6  | -3.774225000 | -0.472371000 | 1.001114000  |
| 6  | -2.418786000 | 1.347632000  | 2.184791000  |
| 6  | -0.472371000 | 3.774225000  | -1.001114000 |
| 6  | -1.066936000 | 2.337655000  | -3.039786000 |

|   |              |              |              |
|---|--------------|--------------|--------------|
| 6 | 1.347632000  | 2.418786000  | -2.184791000 |
| 9 | 4.840616000  | -0.077582000 | 1.617259000  |
| 9 | 3.992611000  | 1.795022000  | 0.928479000  |
| 9 | 3.735991000  | 0.000000000  | -0.245464000 |
| 9 | 1.171118000  | -1.746968000 | 2.446679000  |
| 9 | 3.161555000  | -1.572790000 | 3.285716000  |
| 9 | 2.899454000  | -2.132631000 | 1.210097000  |
| 9 | 1.392759000  | 0.606966000  | 3.874798000  |
| 9 | 2.015932000  | 2.320696000  | 2.717151000  |
| 9 | 3.498533000  | 1.107560000  | 3.724449000  |
| 9 | 2.320696000  | -2.015932000 | -2.717151000 |
| 9 | 0.606966000  | -1.392759000 | -3.874798000 |
| 9 | 1.107560000  | -3.498533000 | -3.724449000 |
| 9 | 0.000000000  | -3.735991000 | 0.245464000  |
| 9 | 1.795022000  | -3.992611000 | -0.928479000 |
| 9 | -0.077582000 | -4.840616000 | -1.617259000 |
| 9 | -2.132631000 | -2.899454000 | -1.210097000 |
| 9 | -1.572790000 | -3.161555000 | -3.285716000 |
| 9 | -1.746968000 | -1.171118000 | -2.446679000 |
| 9 | -3.498533000 | -1.107560000 | 3.724449000  |
| 9 | -1.392759000 | -0.606966000 | 3.874798000  |
| 9 | -2.015932000 | -2.320696000 | 2.717151000  |
| 9 | -4.840616000 | 0.077582000  | 1.617259000  |
| 9 | -3.992611000 | -1.795022000 | 0.928479000  |
| 9 | -3.735991000 | 0.000000000  | -0.245464000 |
| 9 | -3.161555000 | 1.572790000  | 3.285716000  |
| 9 | -2.899454000 | 2.132631000  | 1.210097000  |
| 9 | -1.171118000 | 1.746968000  | 2.446679000  |
| 9 | -2.320696000 | 2.015932000  | -2.717151000 |
| 9 | -0.606966000 | 1.392759000  | -3.874798000 |
| 9 | -1.107560000 | 3.498533000  | -3.724449000 |
| 9 | 2.132631000  | 2.899454000  | -1.210097000 |
| 9 | 1.572790000  | 3.161555000  | -3.285716000 |
| 9 | 1.746968000  | 1.171118000  | -2.446679000 |
| 9 | -1.795022000 | 3.992611000  | -0.928479000 |
| 9 | 0.077582000  | 4.840616000  | -1.617259000 |
| 9 | 0.000000000  | 3.735991000  | 0.245464000  |

**Al(OCAr<sup>F</sup><sub>3</sub>)<sub>3</sub>**

|    |              |              |              |
|----|--------------|--------------|--------------|
| 13 | -0.122957000 | -0.027929000 | -0.035400000 |
| 9  | -0.587785000 | 0.409189000  | 2.041389000  |
| 9  | -0.714362000 | 0.707672000  | 4.627855000  |
| 9  | -2.735870000 | 2.102156000  | 5.815761000  |
| 9  | -4.691361000 | 3.196662000  | 4.263610000  |
| 9  | -4.643417000 | 2.898946000  | 1.620498000  |
| 9  | -0.650480000 | 3.611674000  | 0.692659000  |
| 9  | -0.718990000 | 6.144339000  | -0.085090000 |
| 9  | -2.815567000 | 7.090278000  | -1.549542000 |
| 9  | -4.867535000 | 5.412938000  | -2.181728000 |
| 9  | -4.859578000 | 2.905253000  | -1.407794000 |
| 9  | -2.752028000 | 1.171057000  | -2.647417000 |
| 9  | -4.431777000 | -0.482567000 | -3.872112000 |
| 9  | -6.320218000 | -1.838895000 | -2.451331000 |
| 9  | -6.430682000 | -1.538526000 | 0.254631000  |
| 9  | -4.721219000 | -0.005631000 | 1.523895000  |
| 9  | -0.262062000 | -0.766411000 | -2.029118000 |
| 9  | -0.920843000 | -1.099683000 | -4.533419000 |
| 9  | -1.504057000 | -3.564863000 | -5.547082000 |
| 9  | -1.376625000 | -5.740658000 | -3.913497000 |
| 9  | -0.680924000 | -5.483902000 | -1.366291000 |
| 9  | 0.868372000  | -2.492034000 | 2.562767000  |
| 9  | 3.391028000  | -2.814810000 | 3.305338000  |

---

|   |              |              |              |
|---|--------------|--------------|--------------|
| 9 | 5.237909000  | -3.795632000 | 1.557276000  |
| 9 | 4.477095000  | -4.421498000 | -0.983222000 |
| 9 | 1.993599000  | -4.103216000 | -1.773933000 |
| 9 | -2.987197000 | -2.585121000 | -0.020398000 |
| 9 | -4.764941000 | -3.937120000 | 1.408467000  |
| 9 | -3.984461000 | -6.038488000 | 2.965264000  |
| 9 | -1.355906000 | -6.748592000 | 3.028668000  |
| 9 | 0.440809000  | -5.441664000 | 1.624400000  |
| 9 | 3.529763000  | 3.866404000  | 1.078809000  |
| 9 | 2.998957000  | 6.176236000  | -0.049692000 |
| 9 | 1.581834000  | 6.318649000  | -2.372848000 |
| 9 | 0.683914000  | 4.023270000  | -3.534468000 |
| 9 | 1.216319000  | 1.664557000  | -2.453691000 |
| 9 | 1.358619000  | 2.477208000  | 2.080856000  |
| 9 | 2.027370000  | 2.321405000  | 4.643695000  |
| 9 | 4.190109000  | 0.850699000  | 5.424552000  |
| 9 | 5.651331000  | -0.472751000 | 3.542295000  |
| 9 | 5.003798000  | -0.378285000 | 1.001738000  |
| 9 | 2.418585000  | -1.138915000 | -2.004770000 |
| 9 | 4.233821000  | -1.762819000 | -3.774338000 |
| 9 | 6.586892000  | -0.398889000 | -3.941279000 |
| 9 | 7.056270000  | 1.666939000  | -2.218012000 |
| 9 | 5.239066000  | 2.338555000  | -0.396266000 |
| 8 | -1.324587000 | 1.154995000  | -0.326393000 |
| 8 | -0.486846000 | -1.652482000 | 0.391811000  |
| 8 | 1.519228000  | 0.398013000  | -0.094247000 |
| 6 | -2.560922000 | 1.613722000  | 0.116110000  |
| 6 | -2.614367000 | 1.681340000  | 1.670461000  |
| 6 | -1.651359000 | 1.136361000  | 2.509258000  |
| 6 | -1.672616000 | 1.263252000  | 3.890502000  |
| 6 | -2.697146000 | 1.969213000  | 4.495460000  |
| 6 | -3.686741000 | 2.529357000  | 3.701211000  |
| 6 | -3.633224000 | 2.375354000  | 2.327286000  |
| 6 | -2.706709000 | 3.091615000  | -0.379559000 |
| 6 | -1.692316000 | 3.996499000  | -0.055899000 |
| 6 | -1.714749000 | 5.327637000  | -0.438363000 |
| 6 | -2.781885000 | 5.816065000  | -1.174078000 |
| 6 | -3.818929000 | 4.959199000  | -1.494851000 |
| 6 | -3.778857000 | 3.630605000  | -1.090535000 |
| 6 | -3.638307000 | 0.679287000  | -0.498448000 |
| 6 | -3.616382000 | 0.489908000  | -1.885725000 |
| 6 | -4.497532000 | -0.346520000 | -2.546014000 |
| 6 | -5.467107000 | -1.030877000 | -1.827981000 |
| 6 | -5.523010000 | -0.871767000 | -0.457346000 |
| 6 | -4.611670000 | -0.042039000 | 0.186334000  |
| 6 | -0.191790000 | -2.953323000 | -0.009456000 |
| 6 | -0.499926000 | -3.124400000 | -1.525266000 |
| 6 | -0.558461000 | -2.054412000 | -2.409935000 |
| 6 | -0.889672000 | -2.173157000 | -3.750355000 |
| 6 | -1.182664000 | -3.424069000 | -4.267290000 |
| 6 | -1.122150000 | -4.527280000 | -3.430301000 |
| 6 | -0.778907000 | -4.366192000 | -2.097645000 |
| 6 | 1.293645000  | -3.237061000 | 0.343371000  |
| 6 | 1.730873000  | -2.931377000 | 1.637099000  |
| 6 | 3.037384000  | -3.112302000 | 2.052670000  |
| 6 | 3.979537000  | -3.619027000 | 1.170762000  |
| 6 | 3.586844000  | -3.938080000 | -0.115308000 |
| 6 | 2.267118000  | -3.750644000 | -0.509708000 |
| 6 | -1.164867000 | -3.875308000 | 0.791624000  |
| 6 | -2.527716000 | -3.575350000 | 0.760022000  |
| 6 | -3.478086000 | -4.279765000 | 1.480135000  |
| 6 | -3.086446000 | -5.351115000 | 2.266447000  |

---



|   |              |              |              |
|---|--------------|--------------|--------------|
| 6 | -1.749325000 | -5.704314000 | 2.299127000  |
| 6 | -0.817120000 | -4.982303000 | 1.564578000  |
| 6 | 2.662244000  | 1.183116000  | -0.076537000 |
| 6 | 2.351379000  | 2.628370000  | -0.594700000 |
| 6 | 2.804279000  | 3.828585000  | -0.045588000 |
| 6 | 2.548220000  | 5.063160000  | -0.628031000 |
| 6 | 1.829059000  | 5.141627000  | -1.806516000 |
| 6 | 1.370547000  | 3.972361000  | -2.390915000 |
| 6 | 1.641071000  | 2.752756000  | -1.793362000 |
| 6 | 3.176094000  | 1.120636000  | 1.389433000  |
| 6 | 2.437363000  | 1.745507000  | 2.396689000  |
| 6 | 2.762806000  | 1.674249000  | 3.738498000  |
| 6 | 3.863047000  | 0.932122000  | 4.138991000  |
| 6 | 4.604795000  | 0.268240000  | 3.180141000  |
| 6 | 4.249190000  | 0.353289000  | 1.838503000  |
| 6 | 3.722112000  | 0.663254000  | -1.102472000 |
| 6 | 3.529434000  | -0.390865000 | -1.992812000 |
| 6 | 4.481408000  | -0.748970000 | -2.943066000 |
| 6 | 5.675511000  | -0.059553000 | -3.034694000 |
| 6 | 5.907772000  | 0.992418000  | -2.162107000 |
| 6 | 4.943873000  | 1.329438000  | -1.230343000 |

**[FAI(OCa<sup>r</sup>F<sub>3</sub>)<sub>3</sub>]<sup>-</sup>**

|    |              |              |              |
|----|--------------|--------------|--------------|
| 13 | 0.000000000  | 0.000000000  | 0.343885000  |
| 9  | 0.000000000  | 0.000000000  | 2.043162000  |
| 9  | -2.579777000 | -1.374415000 | 2.543478000  |
| 9  | 0.389563000  | -1.544881000 | -2.637936000 |
| 9  | 1.296789000  | -2.188682000 | 4.827374000  |
| 9  | 0.099610000  | 2.921359000  | 2.543478000  |
| 9  | -0.793930000 | 3.278896000  | -1.945328000 |
| 9  | 2.480166000  | -1.546945000 | 2.543478000  |
| 9  | -5.201879000 | -1.164498000 | 1.762221000  |
| 9  | 1.592455000  | 5.087208000  | 1.762221000  |
| 9  | 4.029006000  | 1.592279000  | 0.210857000  |
| 9  | -0.635549000 | -4.285361000 | 0.210857000  |
| 9  | -6.335314000 | -3.530026000 | 1.621502000  |
| 9  | 1.143124000  | 1.109812000  | -2.637936000 |
| 9  | -2.442642000 | -2.327012000 | -1.945328000 |
| 9  | 1.247060000  | 2.217393000  | 4.827374000  |
| 9  | -1.532687000 | 0.435069000  | -2.637936000 |
| 9  | -1.860696000 | 7.493190000  | -0.246797000 |
| 9  | -2.279849000 | 5.460172000  | -2.017050000 |
| 9  | 5.125893000  | 0.905537000  | 2.499664000  |
| 9  | 3.236572000  | -0.951884000 | -1.945328000 |
| 9  | 3.781200000  | 1.204634000  | 4.853933000  |
| 9  | 0.110565000  | 7.251556000  | 1.621502000  |
| 9  | -0.847356000 | -3.876932000 | 4.853933000  |
| 9  | 0.719497000  | -5.754201000 | -4.601851000 |
| 9  | 6.224750000  | -3.721530000 | 1.621502000  |
| 9  | 2.265174000  | -5.183666000 | -0.219145000 |
| 9  | 4.623536000  | 3.500203000  | -4.601851000 |
| 9  | 3.356599000  | 4.553532000  | -0.219145000 |
| 9  | -2.712341000 | 1.565971000  | -4.685807000 |
| 9  | -1.778728000 | -4.891923000 | 2.499664000  |
| 9  | 0.000000000  | -3.131941000 | -4.685807000 |
| 9  | -2.543849000 | -0.028711000 | 4.827374000  |
| 9  | 3.609424000  | -3.922710000 | 1.762221000  |
| 9  | -3.588724000 | -4.704493000 | -2.017050000 |
| 9  | 1.865002000  | -6.759397000 | -2.333158000 |
| 9  | 2.712341000  | 1.565971000  | -4.685807000 |
| 9  | 5.868572000  | -0.755679000 | -2.017050000 |
| 9  | -5.558945000 | -5.358005000 | -0.246797000 |

---

|   |              |              |              |
|---|--------------|--------------|--------------|
| 9 | -5.621774000 | 0.630135000  | -0.219145000 |
| 9 | -3.393457000 | 2.693082000  | 0.210857000  |
| 9 | 4.921309000  | 4.994838000  | -2.333158000 |
| 9 | 7.419641000  | -2.135185000 | -0.246797000 |
| 9 | -2.933844000 | 2.672298000  | 4.853933000  |
| 9 | -5.343032000 | 2.253998000  | -4.601851000 |
| 9 | -6.786311000 | 1.764560000  | -2.333158000 |
| 9 | -3.347165000 | 3.986385000  | 2.499664000  |
| 8 | -1.575052000 | -0.537938000 | -0.215674000 |
| 8 | 0.321658000  | 1.633004000  | -0.215674000 |
| 8 | 1.253394000  | -1.095066000 | -0.215674000 |
| 6 | -0.562690000 | 4.195951000  | -1.001693000 |
| 6 | -4.732686000 | -1.991826000 | 0.816994000  |
| 6 | 1.040537000  | -2.929305000 | 1.256524000  |
| 6 | 2.016584000  | 2.365784000  | 1.256524000  |
| 6 | 1.355074000  | 2.457696000  | 2.484014000  |
| 6 | 0.435169000  | 4.010540000  | -0.036626000 |
| 6 | -2.910472000 | -0.259734000 | -0.056076000 |
| 6 | 3.293958000  | 1.811169000  | 1.315736000  |
| 6 | 1.349814000  | -3.283534000 | -1.300108000 |
| 6 | -0.245145000 | -3.570083000 | 3.703727000  |
| 6 | -1.337179000 | 5.344052000  | -1.074837000 |
| 6 | 0.770697000  | -2.805090000 | -2.477058000 |
| 6 | -3.518531000 | 0.472794000  | -1.300108000 |
| 6 | 1.929938000  | 2.089672000  | 3.686108000  |
| 6 | 1.230300000  | 2.650409000  | -0.056076000 |
| 6 | 0.844740000  | -2.716211000 | 3.686108000  |
| 6 | -3.959496000 | -3.830058000 | -1.074837000 |
| 6 | -0.708994000 | -4.085822000 | 2.509114000  |
| 6 | -0.121542000 | 6.254133000  | 0.759173000  |
| 6 | -0.078461000 | -3.758236000 | 1.315736000  |
| 6 | 2.043931000  | 2.069988000  | -2.477058000 |
| 6 | -3.352455000 | -2.585279000 | -1.001693000 |
| 6 | 0.641371000  | 5.094540000  | 0.816994000  |
| 6 | 1.450890000  | -2.402377000 | 2.484014000  |
| 6 | -1.122781000 | 6.381829000  | -0.184865000 |
| 6 | 3.255645000  | -2.382138000 | -0.036626000 |
| 6 | 2.866629000  | 2.299498000  | -3.579154000 |
| 6 | -3.690814000 | -1.628403000 | -0.036626000 |
| 6 | -2.805964000 | -0.055319000 | 2.484014000  |
| 6 | -4.965436000 | -4.163271000 | -0.184865000 |
| 6 | -5.355467000 | -3.232325000 | 0.759173000  |
| 6 | 3.892923000  | 1.428905000  | 2.509114000  |
| 6 | 3.156786000  | 3.796678000  | -1.313369000 |
| 6 | 4.091315000  | -3.102713000 | 0.816994000  |
| 6 | 3.982844000  | 4.040575000  | -2.393979000 |
| 6 | 3.214355000  | 1.572740000  | 3.703727000  |
| 6 | 1.680172000  | -2.390676000 | -0.056076000 |
| 6 | 6.088217000  | -2.218558000 | -0.184865000 |
| 6 | 3.915145000  | -1.610672000 | -1.001693000 |
| 6 | -4.866413000 | 0.835518000  | -1.313369000 |
| 6 | 5.296675000  | -1.513995000 | -1.074837000 |
| 6 | 1.507818000  | -5.469532000 | -2.393979000 |
| 6 | -2.814628000 | 0.735102000  | -2.477058000 |
| 6 | 0.923161000  | -4.963938000 | -3.543937000 |
| 6 | -2.774678000 | 0.626539000  | 3.686108000  |
| 6 | -4.760477000 | 1.682488000  | -3.543937000 |
| 6 | -3.424738000 | 1.332825000  | -3.579154000 |
| 6 | -5.490663000 | 1.428957000  | -2.393979000 |
| 6 | -3.215497000 | 1.947067000  | 1.315736000  |
| 6 | -2.969210000 | 1.997343000  | 3.703727000  |
| 6 | -3.057121000 | 0.563521000  | 1.256524000  |

---

|   |              |              |              |
|---|--------------|--------------|--------------|
| 6 | 0.558109000  | -3.632323000 | -3.579154000 |
| 6 | 1.709626000  | -4.632196000 | -1.313369000 |
| 6 | 2.168717000  | 2.810740000  | -1.300108000 |
| 6 | -3.183929000 | 2.656918000  | 2.509114000  |
| 6 | 3.837316000  | 3.281450000  | -3.543937000 |
| 6 | 5.477009000  | -3.021808000 | 0.759173000  |

- [1] a) R. D. Chambers and D. J. Spring, *J. Chem. Soc. C* 1968, 2394; b) S. V. Kulkarni, R. Schure and R. Filler, *J. Am. Chem. Soc.*, 1973, **95**, 1859.
- [2] The low solubility of  $\text{Al}(\text{OCaR}^{\text{F}_3})_3$  in non-coordinating solvents such as  $\text{C}_6\text{D}_6$  or  $\text{CD}_2\text{Cl}_2$  required the usage of THF- $d_8$ . Hence, the  $^{13}\text{C}$  NMR spectrum of the corresponding THF- $d_8$  adduct was measured.
- [3] G. A. Olah, P. Schilling and I. M. Gross, *J. Am. Chem. Soc.* 1974, **96**, 876.
- [4] a) G. M. Sheldrick, *Acta Cryst. A*, 2008, **64**, 112; b) L. J. Farrugia, *J. Appl. Crystallogr.*, 1999, **32**, 837.
- [5] C. F. Macrae, I. J. Bruno, J. A. Chisholm, P. R. Edgington, P. McCabe, E. Pidcock, L. Rodriguez-Monge, R. Taylor, J. van de Streek and P. A. Wood, *J. Appl. Cryst.*, 2008, **41**, 466.
- [6] A. L. Spek, *PLATON, A Multipurpose Crystallographic Tool*, 2011, Utrecht University, NL.
- [7] K. Brandenburg and H. Putz: *Diamond - Crystal and Molecular Structure Visualization v3.2i*, Crystal Impact GbR, Bonn, Germany, 2012.
- [8] a) A. D. Becke, *J. Chem. Phys.*, 1993, **98**, 5648; b) C. Lee, W. Yang and R. G. Parr, *Phys. Rev. B.*, 1988, **37**, 785.
- [9] a) R. Krishnan, J. S. Binkley, R. Seeger and J. A. Pople, *J. Chem. Phys.*, 1980, **72**, 650; b) A. D. McLean and G. S. Chandler, *J. Chem. Phys.*, 1980, **72**, 5639; c) M. J. Frisch, J. A. Pople and J. S. Binkley, *Chem. Phys.* 1984, **80**, 3265; d) T. Clark, J. Chandrasekhar, G. W. Spitznagel and P. V. R. Schleyer, *J. Comp. Chem.*, 1983, **4**, 294.
- [10] M. J. Frisch, G. W. Trucks, H. B. Schlegel, G. E. Scuseria, M. A. Robb, J. R. Cheeseman, G. Scalmani, V. Barone, B. Mennucci, G. A. Petersson, H. Nakatsuji, M. Caricato, X. Li, H. P. Hratchian, A. F. Izmaylov, J. Bloino, G. Zheng, J. L. Sonnenberg, M. Hada, M. Ehara, K. Toyota, R. Fukuda, J. Hasegawa, M. Ishida, T. Nakajima, Y. Honda, O. Kitao, H. Nakai, T. Vreven, J. A. Montgomery, Jr., J. E. Peralta, F. Ogliaro, M. Bearpark, J. J. Heyd, E. Brothers, K. N. Kudin, V. N. Staroverov, T. Keith, R. Kobayashi, J. Normand, K. Raghavachari, A. Rendell, J. C. Burant, S. S. Iyengar, J. Tomasi, M. Cossi, N. Rega, J. M. Millam, M. Klene, J. E. Knox, J. B. Cross, V. Bakken, C. Adamo, J. Jaramillo, R. Gomperts, R. E. Stratmann, O. Yazyev, A. J. Austin, R. Cammi, C. Pomelli, J. W. Ochterski, R. L. Martin, K. Morokuma, V. G. Zakrzewski, G. A. Voth, P. Salvador, J. J. Dannenberg, S. Dapprich, A. D. Daniels, O. Farkas, J. B. Foresman, J. V. Ortiz, J. Cioslowski and D. J. Fox, *Gaussian 09, Revision E.01*, Gaussian, Inc., Wallingford CT, 2013.
- [11] a) S. F. Boys and F. Bernardi, *Mol. Phys.*, 1970, **19**, 553; b) S. Simon, M. Duran and J. J. Dannenberg, *J. Chem. Phys.*, 1996, **105**, 11024.
- [12] A. Y. Timoshkin, E. I. Davydova, T. N. Sevastianova, A. V. Suvorov and H. F. Schaefer, *Int. J. Quant. Chem.*, 2002, **88**, 436.

- 
- [13] H. Böhler, N. Trapp, D. Himmel, M. Schleep and I. Krossing, *Dalton Trans.* 2015, **44**, 7489.
- [14] A. Kraft, N. Trapp, D. Himmel, H. Böhler, P. Schlüter, H. Scherer and I. Krossing, *Chem. Eur. J.*, 2012, **18**, 9371.
- [15] K. O. Christe, D. A. Dixon, D. McLemore, W. W. Wilson, J. Sheehy and J. A. Bootz, *J. Fluorine Chem.*, 2000, **101**, 151.
- [16] I. Krossing and I. Raabe, *Chem. Eur. J.*, 2004, **10**, 5017.
- [17] J. F. Kögel, D. A. Sorokin, A. Khvorost, M. Scott, K. Harms, D. Himmel, I. Krossing and J. Sundermeyer, *Chem. Sci.*, 2018, **9**, 245.
- [18] R. Jupp, T. C. Johnstone and D. W. Stephan, *Dalton Trans.* 2018, **47**, 7029.
- [19] R. G. Parr, L. v. Szentpály and S. Liu, *J. Am. Chem. Soc.* 1999, **121**, 1922.
- [20] A. T. Maynard, M. Huang, W. G. Rice and D. G. Covell, *Proc. Natl. Acad. Sci. U. S. A.* 1998, **95**, 11578.
